# Vascular Endothelial Growth Factor: Basic Science and Clinical Progress

NAPOLEONE FERRARA

Department of Molecular Oncology, Genentech, Inc., South San Francisco, California 94080

Vascular endothelial growth factor (VEGF) is an endothelial cell-specific mitogen *in vitro* and an angiogenic inducer in a variety of *in vivo* models. Hypoxia has been shown to be a major inducer of VEGF gene transcription. The tyrosine kinases Flt-1 (VEGFR-1) and Flk-1/KDR (VEGFR-2) are high-affinity VEGF receptors. The role of VEGF in developmental angiogenesis is emphasized by the finding that loss of a single VEGF allele results in defective vascularization and early embryonic lethality. VEGF is critical also for reproductive and bone angiogenesis. Substantial evidence also implicates VEGF as a mediator of pathological angiogenesis. *In situ* hybridization studies demonstrate expression of VEGF mRNA in

the majority of human tumors. Anti-VEGF monoclonal antibodies and other VEGF inhibitors block the growth of several tumor cell lines in nude mice. Clinical trials with various VEGF inhibitors in a variety of malignancies are ongoing. Very recently, an anti-VEGF monoclonal antibody (bevacizumab; Avastin) has been approved by the Food and Drug Administration as a first-line treatment for metastatic colorectal cancer in combination with chemotherapy. Furthermore, VEGF is implicated in intraocular neovascularization associated with diabetic retinopathy and age-related macular degeneration. (*Endocrine Reviews* 25: 581–611, 2004)

- I. Introduction
- II. Historical Note on Angiogenic Factors
- III. Identification of VEGF
- IV. Activities of VEGF
  - A. Mitogenesis, angiogenesis, and endothelial survival
  - B. Effects of VEGF on bone marrow cells and hematopoiesis
  - C. Enhancement of vascular permeability and hemodynamic effects
- V. VEGF Isoforms
- VI. Regulation of VEGF Gene Expression
  - A. Oxygen tension
  - B. Growth factors, hormones, and oncogenes
- VII. VEGFRs
  - A. VEGFR-1 (Flt-1)
  - B. VEGFR-2 (KDR, human; Flk-1, mouse)
  - C. Neuropilin (NP)1 and NP2
- VIII. Role of VEGF in Physiological Angiogenesis
  - A. Embryonic and postnatal development
  - B. Skeletal growth and endochondral bone formation
  - C. Angiogenesis in endocrine glands

- IX. Role of VEGF in Pathological Conditions
  - A. Solid tumors
  - B. Hematological malignancies
  - C. Intraocular neovascular syndromes
  - D. Inflammatory disorders and brain edema
  - E. Pathology of the female reproductive tract
- X. VEGF and Therapeutic Angiogenesis
- XI. Perspectives

## I. Introduction

THE CARDIOVASCULAR SYSTEM is the first organ system to develop and reach a functional state in an embryo (1). The initial steps consist of “vasculogenesis,” the *in situ* differentiation of endothelial cell precursors, the angioblasts, from the hemangioblasts (2). The juvenile vascular system evolves from the primary capillary plexus by subsequent pruning and reorganization of endothelial cells in a process called “angiogenesis” (3). More recent evidence suggests that incorporation of bone marrow-derived endothelial precursor cells contributes to the growing vessels, complementing the sprouting of resident endothelial cells (4), although the precise contribution of these elements in various pathophysiological circumstances has been a matter of debate (5–9).

The development of a vascular supply is essential also for tissue repair and reproductive functions in the adult (10). Angiogenesis is also implicated in the pathogenesis of a variety of disorders: proliferative retinopathies, age-related macular degeneration (AMD), tumors, rheumatoid arthritis (RA), and psoriasis (10, 11).

In endocrine glands, vascularization serves a unique exchange role for secretory products between interstitial fluid surrounding the parenchymal cells and plasma. Endothelial cells of endocrine glands frequently display fenestrae, which

Abbreviations: aFGF, Acidic fibroblast growth factor; AMD, age-related macular degeneration; bFGF, basic fibroblast growth factor; BMP, bone morphogenetic protein; CL, corpus luteum; CRC, colorectal carcinoma; ECM, extracellular matrix; EG-VEGF, endocrine gland-derived VEGF; eNOS, endothelial NOS; HIF, hypoxia-inducible factor; HSC, hematopoietic stem cell; IFL, irinotecan, 5-fluorouracil, and leucovorin; LSEC, liver sinusoidal endothelial cell; MMP-9, matrix metalloproteinase 9; NO, nitric oxide; NOS, NO synthase; NP, neuropilin; OHSS, ovarian hyperstimulation syndrome; PCOS, polycystic ovary syndrome; PDGF, platelet-derived growth factor; PDGFR, PDGF receptor; PI3 kinase, phosphatidylinositol 3-kinase; PIGF, placenta growth factor; RA, rheumatoid arthritis; RTK, receptor tyrosine kinase; VEGF, vascular endothelial growth factor; VEGFR, VEGF receptor; VHL, von Hippel-Lindau; VPF, vascular permeability factor.

*Endocrine Reviews* is published bimonthly by The Endocrine Society (<http://www.endo-society.org>), the foremost professional society serving the endocrine community.

are highly permeable to fluid and small solutes, thus facilitating bidirectional transport (12).

For more than a decade, the role of vascular endothelial growth factor (VEGF) in the regulation of angiogenesis has been the object of intense investigation (13). Recent evidence indicates that new vessel growth and maturation are highly complex and coordinated processes, requiring the sequential activation of a series of receptors [*e.g.*, Tie1, Tie2, and platelet-derived growth factor (PDGF) receptor- $\beta$  (PDGFR- $\beta$ )] by numerous ligands in endothelial and mural cells (for recent reviews see Refs. 14–16). However, VEGF signaling often represents a critical rate-limiting step in physiological angiogenesis. VEGF (referred to also as VEGF-A) belongs to a gene family that includes placenta growth factor (PlGF) (17, 18), VEGF-B (19), VEGF-C (20, 21), and VEGF-D (22, 23). Additionally, homologs of VEGF have been identified in the genome of the parapoxvirus, Orf virus (24), and shown to have VEGF-like activities (25, 26). Importantly, VEGF-C and VEGF-D regulate lymphatic angiogenesis (27, 28), emphasizing the unique role of this gene family in controlling growth and differentiation of multiple anatomic components of the vascular system.

The main focus of this review is the progress in the biology and clinical applications of the prototype member, VEGF-A. For additional reviews on this topic, see Refs. 29–35.

Importantly, very recent data have shown that inhibiting VEGF results in a clinical benefit, including increased survival, in patients with advanced malignancies, providing the first clinical validation of the hypothesis that blocking angiogenesis is a strategy to treat cancer (36, 37).

## II. Historical Note on Angiogenic Factors

The observation that tumor growth can be accompanied by increased vascularity was reported more than one century ago (for review, see Ref. 13). In 1939, Ide *et al.* (38) postulated the existence of a tumor-derived blood vessel growth-stimulating factor on the basis of the strong neovascular response induced by tumors transplanted in transparent chambers. These authors proposed that such a factor may be responsible for inducing a neovascularization and thus for delivery of nutrients to the growing tumor (38). In 1945, Algire *et al.* (39) advanced this concept, proposing that “the rapid growth of tumor transplants is dependent upon the development of a rich vascular supply,” and speculated that capillary proliferation elicited by tumor cells is mediated by chromatin breakdown products, in agreement with a view prevalent at that time that such products have growth-promoting activity. These investigators also suggested that the acquisition by tumor cells of the ability to promote vascular proliferation is a critical step in tumorigenesis, because it is expected to confer on the tumor cells a growth advantage relative to normal cells (39).

In 1948, Michaelson (40) proposed that a diffusible angiogenic “factor X” produced by the retina is responsible for retinal and iris neovascularization that occurs in proliferative diabetic retinopathy and other retinal disorders, such as central retinal vein occlusion.

In 1968, the first experiments to directly test the hypothesis

that tumors produce angiogenic factors were performed. Greenblatt and Shubik (41) and Ehrmann and Knott (42) demonstrated that transplantation of melanoma or choriocarcinoma cells promoted blood vessel proliferation even when a Millipore filter is interposed between the tumor and the host, thus providing evidence that tumor angiogenesis was mediated by diffusible factor(s) produced by the tumor cells.

In 1971, Folkman (43) proposed that antiangiogenesis might be an effective approach to treat human cancer. Folkman *et al.* (44) initiated initial efforts aimed to isolate a “tumor angiogenesis factor” from human and animal tumors. Subsequently, the angiogenic effects of various factors, including epidermal growth factor, TGF- $\alpha$ , TGF- $\beta$ , TNF- $\alpha$ , angiogenin, *etc.*, were reported. These molecules all were shown to have activity in angiogenesis bioassays—either directly, by promoting endothelial cell proliferation or indirectly, via recruitment of inflammatory cells that could, in turn, release endothelial mitogens (45). However, much of the attention was directed toward two related potent endothelial cell mitogens and angiogenic factors, acidic and basic fibroblast growth factors (aFGF and bFGF) (46). In 1985, the purification to homogeneity and sequencing of both aFGF (47) and bFGF (48) were reported, and the subsequent year their cDNAs were cloned (49, 50). An unexpected finding was that the genes for both aFGF and bFGF do not encode for a conventional secretory signal peptide. Accordingly, it became clear that these molecules are not efficiently secreted and are mostly cell associated (46). Yet, as previously noted, earlier reports had pointed toward the involvement of diffusible factors in tumor angiogenesis (41, 42). This requirement appeared to be true also for physiological angiogenesis such as that associated with corpus luteum (CL) development (51). Vlodavsky *et al.* (52) suggested that the FGFs are sequestered and stored in the extracellular matrix (ECM) bound to heparan sulfate-containing proteoglycans and can be released in a soluble form when the ECM is degraded. However, several studies suggested that immunoneutralization of bFGF had little or no effect on tumor angiogenesis (53, 54). Furthermore, bFGF-null mice, and even double knockout mice with disruptions in aFGF and bFGF genes, do not develop vascular defects (55, 56). A plausible explanation is that several soluble members of the FGF family compensate for the absence of the cell-associated forms. Thus, the ability of growth factors to promote angiogenesis in *in vitro* or *in vivo* bioassays does not necessarily predict a role for such factors in physiological or pathological angiogenesis (57, 58).

## III. Identification of VEGF

Independent and unrelated lines of research converged toward the identification of VEGF (see Ref. 13 for additional details).

In 1983, Senger *et al.* (59) described the partial purification from the conditioned medium of a guinea-pig tumor cell line of a protein able to induce vascular leakage in the skin, which was named “tumor vascular permeability factor” (VPF). The authors proposed that VPF could be a mediator of the high permeability of tumor blood vessels. Because VPF was not

isolated and sequenced, this factor remained molecularly unknown at that time. Senger *et al.* (60) reported the purification and NH<sub>2</sub>-terminal amino acid sequencing of guinea pig VPF in 1990.

In 1989, Ferrara and Henzel (61) reported the isolation of a diffusible endothelial cell-specific mitogen from medium conditioned by bovine pituitary follicular cells, which they named “vascular endothelial growth factor” to reflect the restricted target cell specificity of this molecule. NH<sub>2</sub>-terminal amino acid sequencing of purified VEGF proved that this protein was distinct from the known endothelial cell mitogens such as aFGF or bFGF and indeed did not match any known protein in available databases (61). Subsequently, Connolly *et al.* (62) followed up on the work by Senger *et al.* and independently reported the isolation and sequencing of human VPF from U937 cells. cDNA cloning of VEGF (63) and VPF (64), reported also in 1989, demonstrated that VEGF and VPF were the same molecule. This was surprising, considering that other endothelial cell mitogens such as FGF do not increase vascular permeability. The finding that VEGF is potent, diffusible, and specific for vascular endothelial cells led to the hypothesis that this molecule might play a role in the regulation of physiological and pathological growth of blood vessels (61, 63, 65).

#### IV. Activities of VEGF

##### A. Mitogenesis, angiogenesis, and endothelial survival

A well-documented *in vitro* activity of VEGF is the ability to promote growth of vascular endothelial cells derived from arteries, veins, and lymphatics (for review see Ref. 30). VEGF promotes angiogenesis in tridimensional *in vitro* models, inducing confluent microvascular endothelial cells to invade collagen gels and form capillary-like structures (66, 67). Also, VEGF induces sprouting from rat aortic rings embedded in a collagen gel (68). VEGF also elicits a pronounced angiogenic response in a variety of *in vivo* models including the chick chorioallantoic membrane (63, 69), the rabbit cornea (70), the matrigel plug in mice (71), the primate iris (72), *etc.* VEGF delivery also induces lymphangiogenesis in mice, at least in some circumstances (73). Ergun *et al.* (74) recently proposed that induction of carcinoembryonic antigen-related cell adhesion 1, a membrane glycoprotein expressed in some microvascular endothelial cells, mediates some of the angiogenic effects of VEGF.

VEGF is also a survival factor for endothelial cells, both *in vitro* and *in vivo* (75–79). *In vitro*, VEGF prevents endothelial apoptosis induced by serum starvation. Such activity is mediated by the phosphatidylinositol 3-kinase (PI3 kinase)/Akt pathway (77, 80). Also, VEGF induces expression of the antiapoptotic proteins Bcl-2, A1 (76), XIAP (81), and survivin (82) in endothelial cells. *In vivo*, the prosurvival effects of VEGF are developmentally regulated. VEGF inhibition results in extensive apoptotic changes in the vasculature of neonatal, but not adult, mice (83). Furthermore, a marked VEGF dependence has been demonstrated in endothelial cells of newly formed but not of established vessels within tumors (78, 79). Coverage by pericytes has been proposed to

be one of the key events resulting in loss of VEGF dependence (78).

Although endothelial cells are the primary targets of VEGF, several studies have reported mitogenic effects also on certain nonendothelial cell types, such as retinal pigment epithelial cells (84), pancreatic duct cells (85), and Schwann cells (86). Compennolle *et al.* (87) have also shown that VEGF stimulates surfactant production by alveolar type II cells, resulting in a protective effect from respiratory distress syndrome in mice. Recent studies have emphasized the potential role of VEGF as a neuronal protective factor, and a haplotype in the VEGF gene promoter associated with reduced VEGF expression has been reported to be a risk factor for amyotrophic lateral sclerosis (88).

##### B. Effects of VEGF on bone marrow cells and hematopoiesis

The earliest evidence that VEGF can affect blood cells came from a report describing its ability to promote monocyte chemotaxis (89). Subsequently, VEGF was reported to have hematopoietic effects, inducing colony formation by mature subsets of granulocyte-macrophage progenitor cells (90). Interestingly, VEGF delivery to adult mice inhibits dendritic cell development (91, 92), leading to the hypothesis that VEGF facilitates tumor growth by allowing escape of tumors from the host immune system. Also, VEGF increased production of B cells and the generation of immature myeloid cells (93). Recently, conditional gene knockout technology has been employed to achieve selective VEGF gene ablation in bone marrow cell isolates and hematopoietic stem cells (HSCs) (94). VEGF-deficient HSCs and bone marrow mononuclear cells failed to repopulate lethally irradiated hosts, despite coadministration of a large excess of wild-type cells. These studies elucidated an internal autocrine loop, not blocked by extracellular inhibitors such as antibodies, whereby VEGF controls HSC survival during hematopoietic repopulation (94).

Interestingly, a VEGF-dependent pathway has been shown to play an important role in hematopoiesis even in *Drosophila*, where it controls migration (95) and proliferation (96) of blood cells. Three VEGF-like ligands and a single receptor, known as PDGF/VEGF receptor or PVR, have been identified in *Drosophila* (97). Because *Drosophila* is devoid of a vascular system, these findings indicate that one ancestral, conserved role of VEGF is indeed the regulation of blood cell function (97).

##### C. Enhancement of vascular permeability and hemodynamic effects

As previously noted, VEGF is known also as VPF, based on its ability to induce vascular leakage (59, 98). Such permeability-enhancing activity underlies important roles of this molecule in inflammation and other pathological circumstances (see Section IX.D). Bates and Curry (99) have shown that VEGF induces an increase in hydraulic conductivity of isolated microvessels, an effect that is mediated by increased calcium influx (100). Consistent with a role in the regulation of vascular permeability, VEGF induces endothe-



lial fenestration in some vascular beds (101) and in cultured adrenal endothelial cells (102).

Several studies have pointed to the critical role of nitric oxide (NO) in VEGF-induced vascular permeability, as well as angiogenesis (103–105). Recently, Fukumura *et al.* (106) assessed the relative contribution of the NO synthase (NOS) isoforms, inducible NOS and endothelial NOS (eNOS) to these processes. Angiogenesis, vessel diameter, blood flow rate, and vascular permeability were proportional to NO levels and were most impaired in eNOS<sup>-/-</sup> mice. VEGF significantly increased permeability in both wild-type and inducible NOS<sup>-/-</sup> mice, but not in eNOS<sup>-/-</sup> mice. VEGF-induced angiogenesis was markedly reduced in eNOS<sup>-/-</sup> mice, although the mice develop normally and have no apparent defect in the vasculature. These findings suggest that, although eNOS plays a predominant role in angiogenesis and vascular permeability in response to exogenous VEGF, this pathway is dispensable for developmental angiogenesis.

An issue that has been long debated is whether a correlation exists between vascular permeability and angiogenesis. It has been proposed that increase in microvascular permeability is a step necessary and sufficient for angiogenesis, by providing extravasation of fibrin, which represents a scaffold for endothelial cell proliferation and migration (107). However, as previously mentioned, factors such as bFGF are not known to induce vascular permeability and yet potently induce angiogenesis. Furthermore, vascular leakage is not necessarily followed by angiogenesis. For example, in background diabetic retinopathy, vascular leakage and fibrin deposition (108) may occur in the retina for decades before the onset of angiogenesis in the proliferative phase (109, 110). The report by Eliceiri *et al.* (111) that members of the Src family are differentially involved in mediating VEGF-dependent permeability and angiogenesis showed that the permeability-enhancing activity specifically depends on Src, or Yes. Mice lacking src and Yes display a normal angiogenic response to VEGF without any overt defects in the vasculature, suggesting that enhanced vascular permeability is not a requirement for VEGF-dependent angiogenesis, at least in the circumstances examined to date. Recently, Gratton *et al.* (112) have reported that a peptide that prevents the association of eNOS with caveolin inhibits vascular permeability and tumor progression in mice. However, additional studies have emphasized the complexity of the role of eNOS in tumorigenesis, including a role in the recruitment of endothelial progenitor cells (113) as well as a requirement for angiogenesis (114). Clearly, further studies are needed to fully elucidate this complex issue.

VEGF induces vasodilatation *in vitro* in a dose-dependent fashion (115, 116) and produces transient tachycardia, hypotension, and a decrease in cardiac output when injected iv in conscious, instrumented rats (116). Such effects appear to be caused by a decrease in venous return, mediated primarily by endothelial cell-derived NO (116). Hypotension was a dose-limiting side effect in human trials in which VEGF was systemically administered (117). Conversely, administration of anti-VEGF monoclonal antibodies to cancer patients resulted in elevation of blood pressure (36), indicating that VEGF signaling plays a tonic homeostatic role in the regu-

lation of blood pressure. The mechanism is likely to involve eNOS, but remains to be fully elucidated.

## V. VEGF Isoforms

VEGF has significant homology to PDGF, and all the eight cysteines found in the A and B chains of PDGF are conserved in VEGF (63, 64). The human VEGF-A gene is organized in eight exons, separated by seven introns (118, 119) and is localized in chromosome 6p21.3 (120). Alternative exon splicing results in the generation of four different isoforms, having 121, 165, 189, and 206 amino acids, respectively, after signal sequence cleavage (VEGF<sub>121</sub>, VEGF<sub>165</sub>, VEGF<sub>189</sub>, VEGF<sub>206</sub>) (118, 119). VEGF<sub>165</sub>, the predominant isoform, lacks the residues encoded by exon 6, whereas VEGF<sub>121</sub> lacks the residues encoded by exons 6 and 7. Less frequent splice variants have been also reported, including VEGF<sub>145</sub> (121), VEGF<sub>183</sub> (122), VEGF<sub>162</sub> (123), and VEGF<sub>165b</sub>, a variant reported to have paradoxically an inhibitory effect on VEGF-induced mitogenesis (124).

VEGF is a heparin-binding homodimeric glycoprotein of 45 kDa (61). Such properties closely correspond to those of VEGF<sub>165</sub>, which is indeed the major VEGF isoform (125).

Solution of the crystal structure of VEGF has shown that VEGF forms an antiparallel homodimer covalently linked by two disulfide bridges between Cys-51 and Cys-60 (126). This mode of dimerization is similar to that of the PDGF monomers. The dominant feature within the VEGF monomer is the cystine knot motif that is found in other growth factors (126). Although the VEGF monomer resembles that of PDGF, its NH<sub>2</sub>-terminal segment is helical rather than extended (126).

VEGF<sub>121</sub> is an acidic polypeptide that fails to bind to heparin (125). VEGF<sub>189</sub> and VEGF<sub>206</sub> are highly basic and bind to heparin with high affinity (125). VEGF<sub>121</sub> is a freely diffusible protein. In contrast, VEGF<sub>189</sub> and VEGF<sub>206</sub> are almost completely sequestered in the ECM. VEGF<sub>165</sub> has intermediate properties, because it is secreted, but a significant fraction remains bound to the cell surface and ECM (127). The ECM-bound isoforms may be released in a diffusible form by heparin or heparinase, which displaces them from their binding to heparin-like moieties, or by plasmin cleavage at the COOH terminus, which generates a bioactive fragment consisting of the first 110 NH<sub>2</sub>-terminal amino acids (125). Given the important role of plasminogen activation during physiological and pathological angiogenesis processes (128), this proteolytic mechanism can be particularly important in regulating locally the activity and bioavailability of VEGF.

Plouet *et al.* (129) have proposed a role for urokinase in the generation of bioactive VEGF. Recombinant VEGF<sub>189</sub> from insect cells infected with a recombinant baculovirus was purified as a nonmitogenic 50-kDa precursor that binds to the receptor VEGFR-1 but not to VEGFR-2. However, it could be matured by urokinase as a 38-kDa fragment able to promote endothelial cell proliferation (129). Figure 1 illustrates the properties of the VEGF isoforms.

Importantly, loss of the heparin-binding domain results in a reduction in the mitogenic activity of VEGF (130). These findings suggest that VEGF<sub>165</sub> has optimal characteristics of bioavailability and biological potency. In agreement with

FIG. 1. VEGF isoforms and their interaction with VEGFRs. The diffusible VEGF isoforms, VEGF<sub>121</sub> and VEGF<sub>165</sub>, are released by a variety of normal and transformed cells (the figure shows tumor cells) and may bind to VEGFR-1 (R1) and VEGFR-2 (R2). VEGF<sub>165</sub>, but not VEGF<sub>121</sub>, interacts also with NP1 and NP2. This binding results in enhancement of VEGFR-2-dependent signaling in endothelial cells. After plasmin generation and ECM breakdown, VEGF<sub>189</sub> is cleaved at the COOH terminus, and the resulting 110-amino acid NH<sub>2</sub>-terminal fragment is diffusible and bioactive.

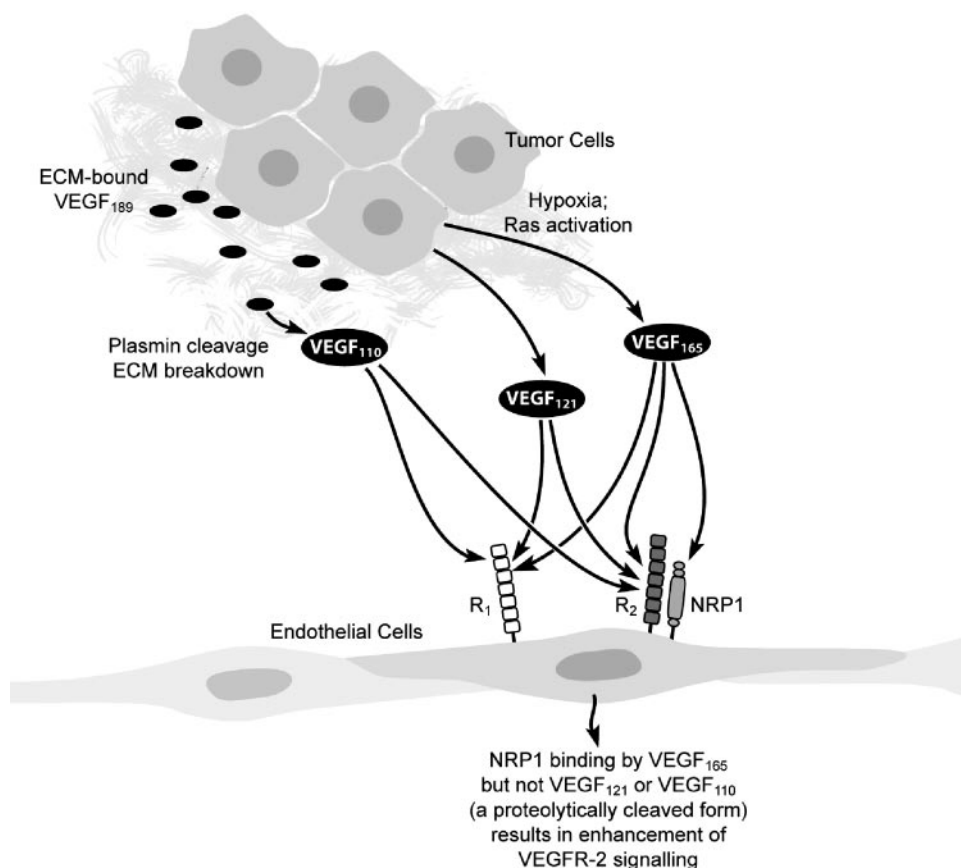

such conclusions, only VEGF<sub>164</sub> (murine VEGF is shorter by one amino acid) is able to fully rescue a tumorigenic phenotype in mouse VEGF<sup>-/-</sup> cells (131). The significance of the heparin-binding VEGF isoform(s) is also emphasized by the finding that 50% of the mice expressing exclusively VEGF<sub>120</sub> (VEGF<sup>120/120</sup>) die shortly after delivery, whereas the rest die within 2 wk (132). Recent studies have also evidenced a deficit in the distribution of endothelial cells and impaired filopodia extension in VEGF<sup>120/120</sup> mice, suggesting that the heparin-binding VEGF isoforms provide essential stimulatory cues to initiate vascular branch formation (133).

## VI. Regulation of VEGF Gene Expression

### A. Oxygen tension

Oxygen tension plays a key role in regulating the expression of a variety of genes (134). VEGF mRNA expression is induced by exposure to low pO<sub>2</sub> in a variety of pathophysiological circumstances (135, 136). Earlier studies indicated similarities between the mechanisms leading to hypoxic regulation of VEGF and erythropoietin (Epo) (137). Hypoxia inducibility is conferred on both genes by homologous sequences. A 28-base sequence has been identified in the 5'-promoter of the rat and human VEGF gene, which mediates hypoxia-induced transcription (138, 139). Such sequence reveals a high degree of homology and similar protein binding characteristics as the hypoxia-inducible factor 1 (HIF-1) binding site within the Epo gene (140). HIF-1 is a basic, het-

erodimeric, helix-loop-helix protein consisting of two subunits, HIF-1 $\alpha$  and aryl hydrocarbon receptor nuclear translocator, known also as HIF-1 $\beta$  (141). It is now well established that HIF-1 is a key mediator of hypoxic responses (142). In response to hypoxia, HIF-1 binds to specific enhancer elements, resulting in increased gene transcription. A gene highly homologous to HIF-1, HIF-2, also forms heterodimers with aryl hydrocarbon receptor nuclear translocator and regulates VEGF expression (143). Recent studies have uncovered the critical role of the product of the von Hippel-Lindau (VHL) tumor suppressor gene in HIF-1-dependent hypoxic responses (for review see Ref. 144). The VHL gene is inactivated in patients with von Hippel-Lindau disease, an autosomal-dominant neoplasia syndrome characterized by capillary hemangioblastomas in retina and cerebellum, and in most sporadic clear cell renal carcinomas (145). Also, the mitogenic activity for endothelial cells in the conditioned medium of renal cell carcinoma cells expressing a mutant VHL was largely neutralized by anti-VEGF antibodies (146). Earlier studies indicated that a function of the VHL protein is to provide negative regulation of VEGF and other hypoxia-inducible genes (147). The spectrum of activities of the VHL protein remains to be fully elucidated, and multiple functions have been proposed, including interaction with fibronectin (148). However, the VHL protein is known to interact with a series of proteins including elongins B and C and CUL2, a member of the Cullin family (149), suggesting homology to yeast ubiquitin ligase complexes known as "SCF complexes." HIF-1 was shown to be consti-

tutively activated in VHL-deficient renal cell carcinoma cell lines (150). More recent studies demonstrated that, indeed, one of the functions of VHL is to be part of a ubiquitin ligase complex that targets HIF subunits for proteasomal degradation after covalent attachment of a polyubiquitin chain (151, 152). Oxygen promotes the hydroxylation of HIF at a proline residue, a requirement for the association with VHL (151, 152). Recently, a family of prolyl hydroxylases related to *Egl-9* *Caenorhabditis elegans* gene product were identified as HIF prolyl hydroxylases (134, 153, 154).

Importantly, other studies have implicated the PI3 kinase/Akt pathway in the regulation of HIF-mediated responses in a hypoxia-independent manner. Zundel *et al.* (155) have shown that mutations resulting in loss of function of the tumor suppressor PTEN, which negatively regulates effectors of PI3 kinase/Akt and is mutated in glioblastoma and other tumors (156, 157), result in increased activation of HIF-1 and increased VEGF transcription. Tang and Lasky (158) have recently elucidated the role of the Forkhead transcription factor (FOXO4) in this pathway. Nuclear localization of Forkhead, which is inhibited by PI3 kinase activation, normally down-regulates the HIF-1 protein. These findings emphasize the multiple advantages conferred on tumor cells by PI3 kinase/Akt activation.

#### B. Growth factors, hormones, and oncogenes

Several major growth factors, including epidermal growth factor, TGF- $\alpha$ , TGF- $\beta$ , keratinocyte growth factor, IGF-I, FGF, and PDGF, up-regulate VEGF mRNA expression (159–161), suggesting that paracrine or autocrine release of such factors cooperates with local hypoxia in regulating VEGF release in the microenvironment. Also, inflammatory cytokines such as IL-1- $\alpha$  and IL-6 induce expression of VEGF in several cell types, including synovial fibroblasts, in agreement with the hypothesis that VEGF may be a mediator of angiogenesis/permeability in inflammatory disorders (162, 163).

Hormones are also important regulators of VEGF gene expression. TSH has been shown to induce VEGF expression in several thyroid carcinoma cell lines (164). Shifren *et al.* (165) have also shown that ACTH is able to induce VEGF expression in cultured human fetal adrenal cortical cells, suggesting that VEGF may be a local regulator of adrenal cortical angiogenesis and an important mediator of the tropic action of ACTH. Gonadotropins have been shown to be potent inducers of VEGF transcription in the ovary, both *in vivo* (166, 167) and *in vitro* (168). Also, human chorionic gonadotropin results in increased VEGF mRNA transcription and protein levels in cultured Leydig cells (169). Several studies have implicated sex steroids as an important stimulus for VEGF regulation in hormone-sensitive tissues. *In vitro*, androgen deprivation of LnCaP prostate cancer cells led to decreased VEGF mRNA and protein expression as well as a 5-fold destabilization in VEGF mRNA transcripts. In mice bearing LnCaP tumors, castration resulted in a rapid decrease in mRNA expression and markedly reduced tumor neovascularization (170). Mueller *et al.* (171) have reported that estradiol is a direct transcriptional activator of VEGF, mediated by a variant estrogen response element located 1.5 kb from the transcription start. Progestins have also been

reported to induce VEGF gene transcription in endometrial carcinoma cells (172).

Specific transforming events also result in induction of VEGF gene expression. Oncogenic mutations or amplification of ras leads to VEGF up-regulation (173, 174). These studies indicate that mutant ras-dependent VEGF expression is necessary, albeit not sufficient, for progressive tumor growth *in vivo* (173–175). Mutations in the Wnt-signaling pathway, which are frequently associated with premalignant colonic adenomas, result in up-regulation of VEGF (176). K-ras activation appeared to enhance Wnt signaling, which suggests an interaction between these two pathways (176). Interestingly, VEGF is up-regulated in polyps of Apc knock-out (Apc $\delta$ 716) mice, a model for human familial adenomatous polyposis (177). In both benign and malignant mouse intestinal tumors, stromal expression of cyclooxygenase 2 results in elevated PGE2 levels that stimulate, in turn, cell surface receptor EP2, followed by induction of VEGF and angiogenesis (177–179). In this context, Amano *et al.* (180) have recently shown that PGE2-EP3 receptor signaling also plays a significant role in up-regulating VEGF in stromal cells and thus potentially in tumor angiogenesis.

### VII. VEGFRs

Initially, VEGF binding sites were identified on the cell surface of vascular endothelial cells *in vitro* (181, 182) and *in vivo* (183, 184). Subsequently, VEGFRs were shown to exist also on bone marrow-derived cells such as monocytes (185). VEGF binds two highly related receptor tyrosine kinases (RTKs), VEGFR-1 and VEGFR-2. Both VEGFR-1 and VEGFR-2 have seven Ig-like domains in the extracellular domain, a single-transmembrane region, and a consensus tyrosine kinase sequence that is interrupted by a kinase-insert domain (186–188). A member of the same family of RTKs is VEGFR-3 (Flt-4) (189), which, however, is not a receptor for VEGF, but instead binds VEGF-C and VEGF-D (27). In addition to these RTKs, VEGF interacts with a family of coreceptors, the neuropilins (NP). Figure 2 summarizes the interaction of the members of the VEGF gene family with the VEGF RTKs.

#### A. VEGFR-1 (Flt-1)

Although Flt-1 (fms-like tyrosine kinase) was the first RTK to be identified as a VEGFR more than a decade ago (190), the precise function of this molecule is still the object of debate. Recent evidence indicates that the conflicting reports may be due, at least in part, to the fact that VEGFR-1 functions and signaling properties can be different depending on the developmental stage and the cell type, *e.g.*, endothelial *vs.* hematopoietic cells. VEGFR-1 expression is up-regulated by hypoxia via a HIF-1-dependent mechanism (191). VEGFR-1 binds not only VEGF-A but also PlGF (192) and VEGF-B (193), which fail to bind VEGFR-2. An alternatively spliced soluble form of VEGFR-1 (sFlt-1) has been shown to be an inhibitor of VEGF activity (194). The binding site for VEGF (and PlGF) has been mapped primarily to the second Ig-like domain (195–197). The crystal structure of a VEGF-Flt-1 domain 2 complex has shown the poles of the VEGF dimer to



FIG. 2. Role of the VEGFR tyrosine kinases in endothelial cells. VEGFR-1 (R1) and VEGFR-2 (R2) are expressed in the cell surface of most blood endothelial cells. In contrast, VEGFR-3 (R3) is largely restricted to lymphatic endothelial cells. VEGF-A binds both VEGFR-1 and VEGFR-2. In contrast, PLGF and VEGF-B interact only with VEGFR-1. VEGF-C and VEGF-D bind VEGFR-2 and VEGFR-3. There is much evidence that VEGFR-2 is the major mediator of endothelial cell mitogenesis, survival, and microvascular permeability. In contrast, VEGFR-1 does not mediate an effective mitogenic signal in endothelial cells and it may, especially during early embryonic development, perform an inhibitory role by sequestering VEGF and preventing its interaction with VEGFR-2. Such a “decoy” role could be also performed by the alternatively spliced soluble VEGFR-1. EC, Endothelial cell; uPA, urokinase-type plasminogen activator; tPA, tissue-type plasminogen activator.

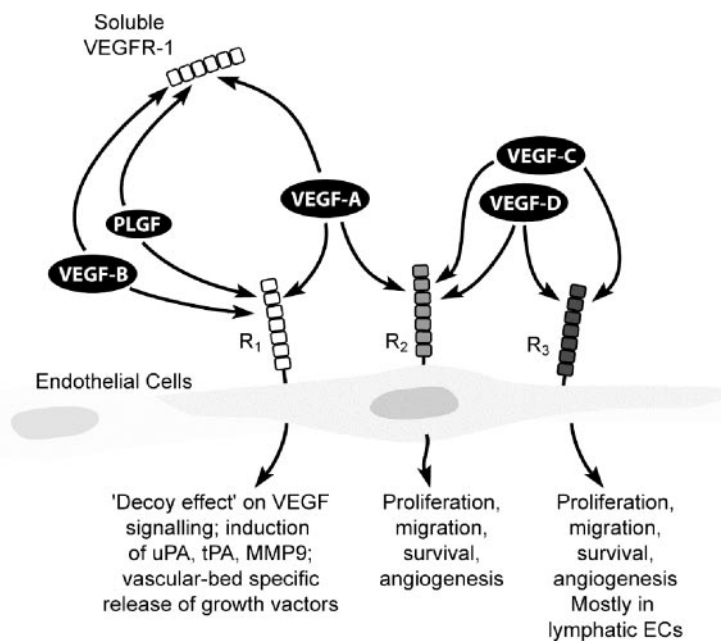

FIG. 3. Ribbon representation of the VEGF-VEGFR1-domain 2 complex. The two VEGF monomers are shown in blue and yellow, and the two receptor molecules are depicted in green. This is a “top down” view and shows the complex looking toward the membrane. The termini are labeled. [Reproduced with permission from C. Wiesmann.]

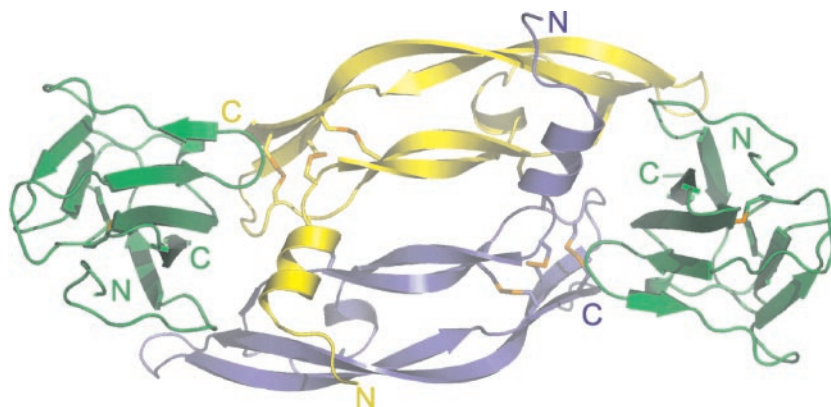

be in a predominantly hydrophobic interaction with domain 2 (198). Figure 3 illustrates the complex VEGF-VEGFR-1 domain 2 in a ribbon format.

Flt-1 reveals a weak tyrosine autophosphorylation in response to VEGF (190, 199). Park *et al.* (192) initially proposed that VEGFR-1 may be not primarily a receptor transmitting a mitogenic signal, but rather a “decoy” receptor, able to regulate in a negative fashion the activity of VEGF on the vascular endothelium, by sequestering and rendering this factor less available to VEGFR-2 (see Fig. 2). Thus, the observed potentiation of the action of VEGF by PLGF could be explained, at least in part, by displacement of VEGF from VEGFR-1 binding (192). Not only the full-length membrane-bound form of VEGFR-1, but also sFlt-1, could perform such a decoy function (200). Recent studies have shown that, indeed, a synergism exists between VEGF and PLGF *in vivo*, especially during pathological situations, as evidenced by impaired tumorigenesis and vascular leakage in *Plgf*<sup>-/-</sup> mice (200). Gille *et al.* (201) have identified a repressor motif in the juxtamembrane region of VEGFR-1 that impairs PI3 kinase activation and endothelial cell migration in response to VEGF. Zeng *et al.* (202) have proposed that VEGFR-1

activation results in inhibition of VEGFR-2-dependent endothelial cell proliferation and that this inhibitory pathway is PI3 kinase dependent. However, other studies indicated that VEGFR-1 is able to interact with various signal-transducing proteins and generate, in some circumstances, a mitogenic signal (203, 204). Very recently, Autiero *et al.* (205) have proposed that PLGF regulates inter- and intramolecular cross-talk between the VEGF RTKs. Activation of VEGFR-1 by PLGF resulted in transphosphorylation of VEGFR-2, thus amplifying VEGF-driven angiogenesis through VEGFR-2. According to these studies, although VEGF and PLGF both bind VEGFR-1, PLGF uniquely stimulated the phosphorylation of specific VEGFR-1 tyrosine residues, and this results in the expression of distinct target genes (205). This finding is somewhat surprising, considering that PLGF and VEGF bind to the same binding interface of VEGFR-1 in a very similar fashion (206).

Irrespective of the conflicting evidence on the role of VEGFR-1 as a signaling receptor, gene-targeting studies have demonstrated the essential role of this molecule during embryogenesis. *Flt-1*<sup>-/-</sup> mice die *in utero* between d 8.5 and d 9.5 (207, 208). Endothelial cells develop but fail to organize

in vascular channels. Excessive proliferation of angioblasts has been reported to be responsible for such disorganization and lethality (208), indicating that, at least during early development, VEGFR-1 is a negative regulator of VEGF action. More compelling evidence in support of this view stems from the report that a targeted mutation resulting in a VEGFR-1 lacking the tyrosine kinase (TK) domain, but able to bind VEGF, does not result in lethality or any overt defect in vascular development (209). Nevertheless, one specific biological response, the migration of monocytes in response to VEGF (or PlGF) has been shown to require the tyrosine kinase domain of VEGFR-1 (209, 210) (Fig. 4). Selvaraj *et al.* (211) have shown recently that PlGF binding to VEGFR-1 in monocytes results in activation of PI3 kinase/AKT and ERK-1/2 pathways, leading to chemotaxis as well as to the induction of a series of inflammatory cytokines. Furthermore, Lewis lung carcinoma cells overexpressing PlGF grow in wild-type mice faster than in VEGFR-1 tyrosine kinase-deficient mice, suggesting that VEGFR-1 may be a positive regulator under pathological conditions when a VEGFR-1-specific ligand is highly expressed (212). These findings suggest that VEGFR-1 has a dual function in angiogenesis, acting in a positive or negative manner in different circumstances. Recently, VEGFR-1 signaling has been also linked to the induction of matrix metalloproteinase 9 (MMP-9) in lung endothelial cells and to the facilitation of lung metastases (213). Recent studies have emphasized the effects of VEGFR-1 in hematopoiesis and recruitment of endothelial progenitors. Hattori *et al.* (214) have shown that VEGFR-1 activation by PlGF is able to reconstitute hematopoiesis by recruiting VEGFR-1<sup>+</sup> HSC. In addition, Gerber *et al.* (94) have shown that VEGFR-1 activation by enforced expression of PlGF rescues survival and ability to repopulate in VEGF<sup>-/-</sup> HSC. Furthermore, PlGF can promote collateral vessel

FIG. 4. Role of VEGFR-1 (R1) in monocyte chemotaxis. VEGFR-1 activation by VEGF-A, PlGF, or VEGF-B (data not shown) results in monocyte recruitment in normal or transformed tissues. Monocytes may, in turn, produce VEGF-A and other angiogenic factors, which may amplify the angiogenesis cascade.

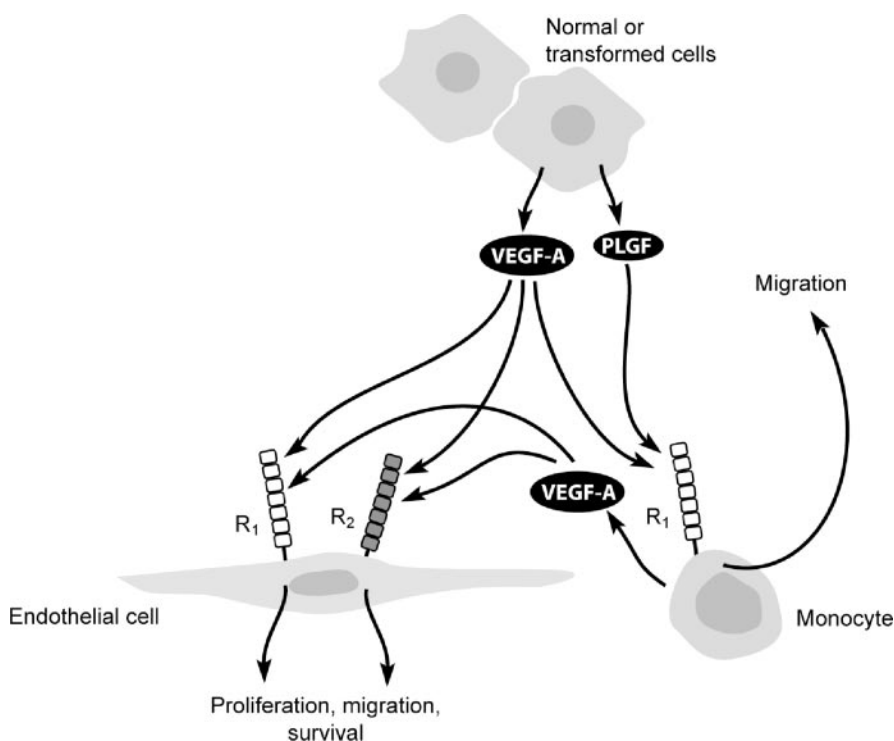

growth and arteriogenesis in models of myocardial and limb ischemia through the recruitment of bone marrow cells such as monocytes (215, 216).

LeCouter *et al.* (217) recently provided evidence for a novel function of VEGFR-1 in liver sinusoidal endothelial cells (LSECs). VEGFR-1 activation achieved with a receptor-selective VEGF mutant or PlGF resulted in the paracrine release of hepatocyte growth factor, IL-6, and other hepatotrophic molecules by LSECs, to the extent that hepatocytes were stimulated to proliferate when cocultured with LSECs. VEGF had no direct mitogenic effect on hepatocytes. A VEGFR-1 agonist protected the liver from CCl<sub>4</sub>-induced damage, in spite of the inability to induce LSEC proliferation (Fig. 5). These findings suggest that a key function of VEGFR-1 signaling in the vascular endothelium is not the regulation of angiogenesis but, rather, the paracrine release of tissue-specific growth/survival factors, possibly in a vascular bed-specific fashion (217). In this context, liver and pancreas morphogenesis is induced by endothelial cells before the establishment of a blood flow, indicating that a paracrine function of gut endothelial cells plays a critical role during organogenesis (218, 219).

#### B. VEGFR-2 (KDR, human; Flk-1, mouse)

VEGFR-2 binds VEGF, albeit with lower affinity relative to VEGFR-1 [dissociation constant ( $K_d$ ) 75–250 pM *vs.* 25 pM] (220–222). The key role of this receptor in developmental angiogenesis and hematopoiesis is evidenced by lack of vasculogenesis and failure to develop blood islands and organized blood vessels in Flk-1 null mice, resulting in death *in utero* between d 8.5 and d 9.5 (223). Consistent with a role in hematopoiesis, VEGFR-2 has been identified on a subset of multipotent human HSCs (224). There is now general agree-



FIG. 5. Differential effects of VEGFR-1 and VEGFR-2 in LSECs. In response to VEGFR-1 activation, LSECs are not stimulated to proliferate but are instructed to up-regulate a series of hepatotrophic genes, including hepatocyte growth factor (HGF), IL-6, and heparin-binding epidermal growth factor (HB-EGF). Thus, VEGFR-1 agonists may result in significant hepatocellular protection from hepatotoxins, without stimulation of angiogenesis. VEGFR-2 activation not only mediates LSEC proliferation, migration, and survival, but also results in induction of a subset of hepatotrophic genes. CTGF, Connective tissue growth factor.

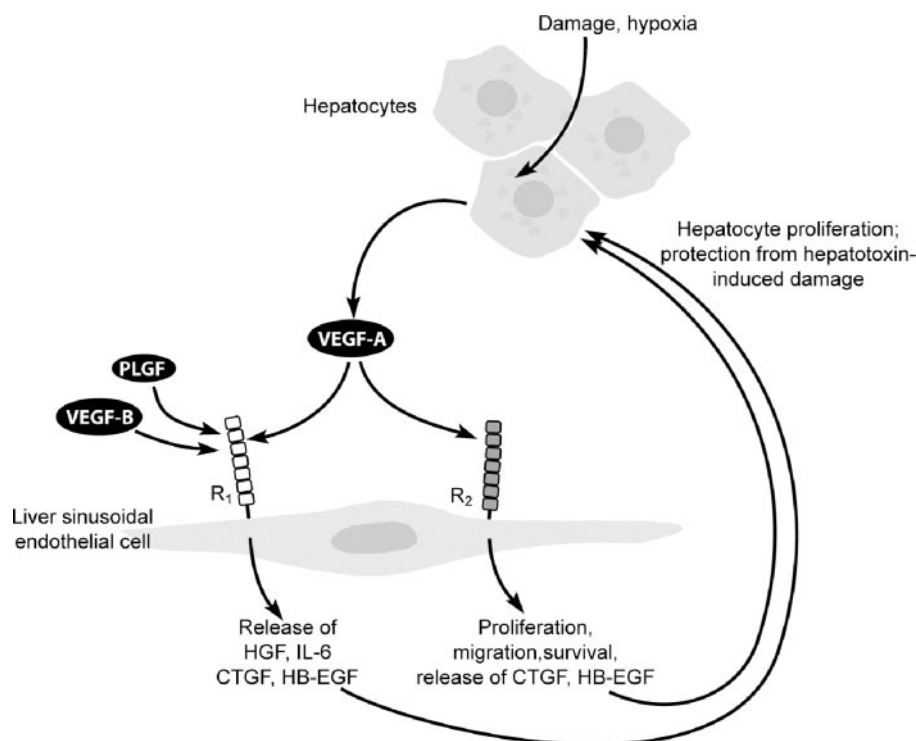

ment that VEGFR-2 is the major mediator of the mitogenic, angiogenic, and permeability-enhancing effects of VEGF.

The binding site for VEGF has been mapped to the second and third Ig-like domains (225). VEGFR-2 undergoes dimerization and strong ligand-dependent tyrosine phosphorylation in intact cells and results in a mitogenic, chemotactic, and pro-survival signal. Several tyrosine residues have been shown to be phosphorylated (for review see Ref. 226). Takahashi *et al.* (227) have shown that Y1175 and Y1214 are the two major VEGF-A-dependent autophosphorylation sites in VEGFR-2. However, only autophosphorylation of Y1175 is crucial for VEGF-dependent endothelial cell proliferation. Also, VEGF has been shown to induce the phosphorylation of at least 11 proteins in bovine aortic endothelial cells (228). Among these, VEGF induces phosphorylation of phospholipases C $\gamma$ , PI3-kinase, ras GTPase activating protein (228), src family (111), and several other signal transduction molecules (226). Byzova *et al.* (229) have reported that VEGFR-2 activation by VEGF results in PI3 kinase/Akt-dependent activation of several integrins. VEGF enhanced cell adhesion, migration, soluble ligand binding, and adenovirus gene transfer mediated by  $\alpha v\beta 3$  and also activated other integrins known to be involved in angiogenesis,  $\alpha v\beta 5$ ,  $\alpha 5\beta 1$ , and  $\alpha 2\beta 1$  (229). VEGFR-2 activation induces endothelial cell growth by activating the Raf-Mek-Erk pathway. An unusual feature of VEGFR-2 activation of this pathway is the requirement for protein kinase C but not ras (230, 231). VEGF mutants that bind selectively to VEGFR-2 are fully active endothelial cell mitogens, chemoattractants, and permeability-enhancing agents, whereas mutants specific for VEGFR-1 are devoid of all three activities (232). Also, VEGF-E, a homolog of VEGF identified in the genome of the parapoxvirus Orf virus (24), which shows VEGF-like mitogenic and permeability-

enhancing effects, binds and activates VEGFR-2 but fails to bind VEGFR-1 (25, 26). Interestingly, similar biological effects and receptor selectivity have been recently reported with snake-derived VEGF (233). Furthermore, VEGFR-2 (but not VEGFR-1) activation has been shown to be required for the antiapoptotic effects of VEGF for human umbilical vein endothelial cells (77). As previously noted, such a pro-survival effect of VEGF is mediated by the PI3 kinase/Akt pathway (77). This pathway is critical also for VEGF-dependent endothelial chemotaxis (201, 232, 234). Recent studies suggest, however, that at least in some circumstances, VEGFR-1 may transmit a pro-survival signal in endothelial cells, possibly mediated by induction of the antiapoptotic gene survivin (235).

### C. Neuropilin (NP)1 and NP2

Earlier studies indicated that certain tumor and endothelial cells express cell surface VEGF-binding sites distinct in affinity and molecular mass from the two known VEGF RTKs (236). Interestingly, VEGF<sub>121</sub> failed to bind these sites, indicating that exon 7-encoded basic sequences are required for binding to this putative receptor (236). Subsequently, Soker *et al.* (237) identified such isoform-specific VEGF receptor as NP1, a molecule that had been previously shown to bind the collapsin/semaphorin family and was implicated in neuronal guidance (for review see Ref. 238). When coexpressed in cells with VEGFR-2, NP1 enhanced the binding of VEGF<sub>165</sub> to VEGFR-2 and VEGF<sub>165</sub>-mediated chemotaxis (237). NP1 appears to present VEGF<sub>165</sub> to the VEGFR-2 in a manner that enhances the effectiveness of VEGFR-2-mediated signal transduction (237). Fuh *et al.* (239) have shown that NP1 is able to directly bind VEGFR-1, suggesting that one of the

mechanisms by which VEGFR-1 functions as a negative regulator of VEGF activity is competing for NP1 binding. Binding to NP1 may help to explain the greater mitogenic potency of VEGF<sub>165</sub> relative to VEGF<sub>121</sub>. So far, there is no clear evidence that NP1 or the related NP2 signals after VEGF binding (238). In contrast, in response to semaphorin binding, NP1 and NP2 signals axon repulsion. Interestingly, collapsin 1 is able to inhibit the motility of porcine aortic endothelial cells expressing NP1 (240). Recent evidence indicates that the formation of complexes with plexins is a requirement for NP signaling in neurons (241, 242). The role of NP1 in the development of the vascular system has been demonstrated by gene-targeting studies, documenting embryonic lethality in null mice (243). Furthermore, Lee *et al.* (244) have shown that, in the zebrafish, NP1 is required for vascular development and mediates VEGF-dependent angiogenesis. Interestingly, recent studies have linked NP2 to lymphatic vessel development (245).

### VIII. Role of VEGF in Physiological Angiogenesis

#### A. Embryonic and postnatal development

In 1996, two studies demonstrated an essential role of VEGF in embryonic vasculogenesis and angiogenesis in the mouse (246, 247). Inactivation of a single VEGF allele resulted in embryonic lethality between d 11 and d 12. The *vegfr*<sup>+/−</sup> embryos exhibited a number of developmental anomalies, defective vascularization in several organs, and a markedly reduced number of nucleated red blood cells within the blood islands in the yolk sac, indicating that VEGF regulates both vasculogenesis and early hematopoiesis. Conditional VEGF gene inactivation in VEGF *loxP* mice, using a Nestin promoter-driven Cre-recombinase, has shown that the dosage of VEGF from neural progenitor cells is a critical determinant in the development and density of vascular plexus in the developing nervous system, to the extent that severe reductions in VEGF led to decreases in vascularity and subsequent hypoxia, resulting in the specific degeneration of the cerebral cortex and neonatal lethality (248, 249). Conversely, even modest increases in VEGF gene expression, achieved by the insertion of a LacZ cassette in the 3′-untranslated region of the VEGF gene, result in severe abnormalities in heart development and embryonic lethality at embryonic d 12.5 (E12.5)–E14 (250). These findings indicate a critical VEGF gene-dosage dependence during development. In contrast, inactivation of PlGF (200) or VEGF-B (251) genes did not result in any major development abnormalities, although VEGF-B inactivation in mice results in reduced heart size and impaired recovery from experimentally induced myocardial ischemia (251). So far, it appears that, among the other members of the VEGF gene family, only VEGF-C plays an essential role in development, because its inactivation results in embryonic lethality due to defective lymphatic development and fluid accumulation in tissues (252).

To determine the role of VEGF in early postnatal life, several strategies have been employed (83). Partial inhibition of VEGF achieved by Cre-*loxP*-mediated gene targeting resulted in increased mortality, stunted body growth, and impaired organ development. Administration of a soluble

VEGFR-1 chimeric protein, which achieves a nearly complete VEGF inhibition, results in almost complete growth arrest, when the treatment is initiated at d 1 or d 8 postnatally. Endothelial cells isolated from the liver of VEGFR1-IgG-treated neonates demonstrated increased apoptotic index, indicating that VEGF is required not only for proliferation but also for survival of endothelial cells (83). Such treatment is also accompanied by rapid lethality, primarily due to inhibition of glomerular development leading to kidney failure (83). Defective glomerular endothelial development in neonates was also observed in studies using anti-VEGF antibodies (253). The pivotal role of VEGF in kidney development was also demonstrated by a very recent study showing that selective VEGF deletion in podocytes, using a Nephin promoter-driven Cre recombinase, leads to glomerular disease in a gene dosage-dependent fashion (254). Heterozygous mice developed renal disease by 2.5 wk of age, characterized by proteinuria and endotheliosis. Homozygosity resulted in perinatal lethality (254). However, VEGF neutralization in fully developed normal mice (83) or rats (255) had no significant effects on glomerular function. In contrast, VEGF inhibition in adult rats with mesangioproliferative nephritis led to a reduction of glomerular endothelial regeneration and an increase in endothelial cell death, indicating that VEGF may be important for glomerular endothelial cell repair after injury, but not for endothelial survival in a healthy animal (255). In apparent conflict with these conclusions, Sugimoto *et al.* (256) have recently reported that the administration of anti-VEGF antibodies or sFlt-1 to adult mice results in proteinuria accompanied by glomerular endothelial cell detachment and hypertrophy, in association with down-regulation of nephrin. The reason for such discrepancies is unclear.

Importantly, VEGF neutralization in juvenile primates using a humanized anti-VEGF monoclonal antibody (bevacizumab) did not result in any renal or other significant abnormalities, except the suppression of growth plate and ovarian angiogenesis, as described below (257). Furthermore, as discussed in Section IX.A, long-term administration of bevacizumab to cancer patients resulted in minimal kidney toxicity (36, 258).

#### B. Skeletal growth and endochondral bone formation

Endochondral bone formation is a fundamental mechanism for longitudinal bone growth. Cartilage, an avascular tissue, is replaced by bone in a process named endochondral ossification (259). VEGF mRNA is expressed by hypertrophic chondrocytes in the epiphyseal growth plate, suggesting that a VEGF gradient is needed for directional growth and cartilage invasion by metaphyseal blood vessels (260, 261). After VEGF blockade with a soluble VEGFR-1 chimeric protein or an anti-VEGF monoclonal antibody, blood vessel invasion is almost completely suppressed, concomitant with impaired trabecular bone formation, in developing mice and primates (257, 260). Although proliferation, differentiation, and maturation of chondrocytes were apparently normal, resorption of hypertrophic chondrocytes was inhibited, resulting in a marked expansion of the hypertrophic chondrocyte zone. Importantly, cessation of the anti-VEGF treatment is fol-

lowed by capillary invasion, restoration of bone growth, and normalization of the growth plate architecture. Recent studies indicate that VEGF mRNA in osteoblasts is induced by bone morphogenetic proteins (BMPs), suggesting that VEGF produced by osteoblasts in response to BMPs may couple angiogenesis to bone formation (262). Conversely, VEGF may induce BMP-2 expression in endothelial cells, suggesting that endothelial cells may play also an osteogenic role by a BMP-2-dependent stimulation of osteoblasts (263).

Interestingly, a growth plate abnormality similar to that induced by VEGF inhibitors was observed in MMP-9<sup>-/-</sup> mice (264). Recent evidence indicates that a function of MMP-9 is to render VEGF bioavailable to its receptors (265). VEGF blockade inhibits bone repair (266); MMP-9<sup>-/-</sup> mice have delayed healing of fractures, and administration of exogenous VEGF corrects this defect (267). Furthermore, VEGF has direct chemotactic and other effects on osteoblasts (268) and osteoclasts (269). These findings indicate not only that VEGF-dependent blood vessel recruitment is essential for coupling cartilage resorption with bone formation, but also that the effects of VEGF on bone homeostasis are complex and involve direct effects on bone cells (270).

A similar, although less dramatic, phenotype was obtained, when VEGF was deleted in the cartilage of developing mice by means of Cre-*loxP*-mediated, tissue-specific gene ablation (271). Furthermore, examination of VEGF<sup>120/120</sup> mice not only revealed a delayed recruitment of blood vessels into the perichondrium but also showed delayed invasion of vessels into the primary ossification center, demonstrating a significant role of heparin-binding VEGF isoform at both an early and later stage of cartilage vascularization (272).

### C. Angiogenesis in endocrine glands

Angiogenesis is a key aspect of normal cyclical ovarian function. Follicular growth and the development of the CL are dependent on the proliferation of new capillary vessels (273). The process of selection of a dominant follicle in monovular species has been also associated with angiogenesis, as there is evidence that selected follicles possess a more elaborate microvascular network than other follicles (274). The angiogenesis that accompanies CL development also plays a key role in the delivery of cholesterol to luteal cells for progesterone biosynthesis (275). Subsequently, the blood vessels regress, suggesting the coordinated action of inducers as well as inhibitors of angiogenesis in the course of the ovarian cycle (276, 277).

Previous studies have shown that the VEGF mRNA expression is temporally and spatially related to the proliferation of blood vessels in the ovary (278, 279). Administration of VEGF inhibitors delays follicular development (280) and suppresses luteal angiogenesis in rodents (167, 281) as well as in primates (257, 282–284). These studies have established that VEGF is indeed the principal regulator of ovarian angiogenesis and that blockade of the VEGF pathway is sufficient to disrupt angiogenesis. Figure 6 illustrates the experiments that demonstrated, for the first time, such a key role of VEGF, using VEGF-soluble receptors in a rat model of hormonally induced ovulation (167).

More recent studies have indicated that endocrine gland-derived VEGF (EG-VEGF), a novel angiogenic factor that is selectively expressed in steroidogenic tissues, plays a cooperative role with VEGF in the regulation of angiogenesis in the human ovary (285). EG-VEGF is not structurally related

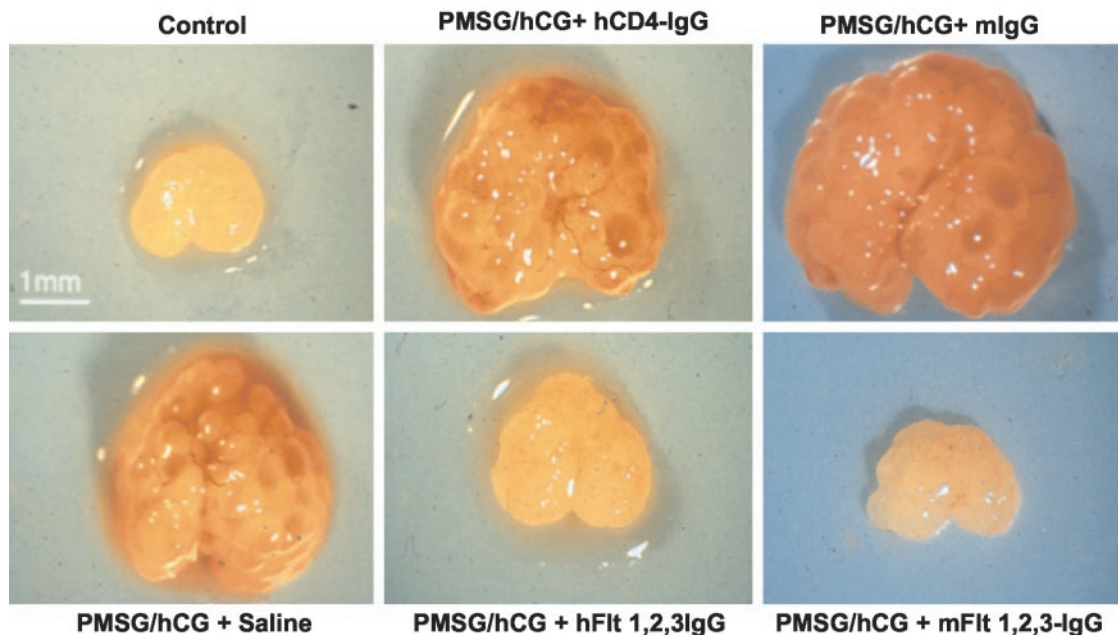

FIG. 6. VEGF is essential for CL angiogenesis (167). Ovulation was hormonally induced in rats using PMSG, followed by human chorionic gonadotropin (hCG), and this treatment resulted in a dramatic increase in ovarian weight and vascularity 5 d after PMSG administration. Animals were given human (h) or mouse (m) Flt(1–3)-IgG, which potently inhibits VEGF, or control proteins (CD4-IgG or mIgG). Note the complete suppression of ovarian angiogenesis and growth after administration of the VEGF inhibitors. PMSG, Pregnant mare's serum gonadotropin.



to VEGF but belongs to a unique gene family having distant homology to Dickopf, an inhibitor of Wnt signaling (286, 287). A sequential activation of the two genes occurs in the human ovary (288). Whereas VEGF mRNA is strongly expressed in early-stage CL, coincident with the initial development of a capillary plexus, its expression is markedly reduced by midluteal phase. In contrast, EG-VEGF starts being expressed later than VEGF but persists throughout mid- and early-late luteal phase, suggesting that EG-VEGF may be important for the persistence and adequacy of luteal function (288). Thus, the ovary has apparently developed a highly specific local mechanism to complement the action of VEGF. Interestingly, such an acquisition seems to be, at least in part, a late event in evolution and may reflect a greater functional/morphological complexity of organs like the ovary. Although association of human EG-VEGF expression with steroidogenic cells is compelling, the mouse ortholog of this gene has a different expression pattern (289). In this context, a consensus binding site for the NR5A1 orphan nuclear receptor is present within the human EG-VEGF promoter (289). NR5A1, considered to be a key regulator of endocrine development and function (290, 291), regulates multiple target genes involved in gonadal and adrenal determination and development, steroidogenesis, and reproduction (for review see Ref. 292). Although rodents have served as models for endocrinology and ovarian physiology, clear differences exist between the rodent and human ovary. The length of the ovarian cycle also distinguishes the human or primate from the rodent. In humans the cycle is 28 d, and in rodents the cycle is completed every 4 d (293). The primate CL is functional for 2 wk before its regression in the infertile cycle, whereas the rodent CL is active for less than 1 d (294).

Recently, the role of VEGF in the development of pancreatic islets has been investigated (295). Deletion of VEGF in the mouse pancreas reveals that endocrine cells signal back to the adjacent endothelial cells to induce the formation of a dense network of fenestrated capillaries in islets. Interestingly, VEGF is not required for the development of all islet capillaries. However, the remaining capillaries found in the VEGF-deficient islets were not fenestrated and contained an unusual number of caveolae. In addition, glucose tolerance tests reveal that the VEGF-induced capillary network is not strictly required for blood glucose control but is essential for fine tuning blood glucose regulation (295).

## IX. Role of VEGF in Pathological Conditions

### A. Solid tumors

Many tumor cell lines secrete VEGF *in vitro*, suggesting the possibility that this diffusible molecule may be a mediator of tumor angiogenesis (29). *In situ* hybridization studies have demonstrated that the VEGF mRNA is expressed in the vast majority of human tumors so far examined, including carcinoma of the lung (296, 297), breast (298, 299), gastrointestinal tract (300–303), kidney (304–306), bladder (304), ovary (307–309), and endometrium (310) and several intracranial tumors including glioblastoma multiforme (311–313) and sporadic, as well as VHL syndrome-associated, capillary hemangioblastoma (314, 315). In glioblastoma multiforme and

other tumors with significant necrosis, the expression of VEGF mRNA is highest in hypoxic tumor cells adjacent to necrotic areas (311–313).

VEGF mRNA is also expressed in endocrine tumors. Expression of VEGF has been demonstrated in a variety of pituitary tumors. Lloyd *et al.* (316) examined a series of 148 tumors and found that VEGF expression, as assessed by immunohistochemistry, although in general less intense than in normal pituitary tissue, is more prominent in certain adenoma subtypes, especially GH adenomas. Furthermore, carcinomas show increased VEGF expression relative to adenomas, suggesting an up-regulation of VEGF during pituitary tumor progression (316). Soh *et al.* (317) found the VEGF mRNA to be higher in thyroid cancer cell lines compared with primary cultures of normal thyroid cells and higher in thyroid cancers of follicular than those of parafollicular cell origin. Furthermore, Klein *et al.* (318) have shown that expression of VEGF by immunohistochemistry is a negative prognostic marker in papillary thyroid carcinoma. The distribution of VEGF and other angiogenic factors in endocrine tumors has been recently reviewed by Turner *et al.* (319).

In 1993, Kim *et al.* (320) reported that anti-VEGF monoclonal antibodies exert a potent inhibitory effect on the growth of several tumor cell lines in nude mice, whereas the antibody had no effect on the tumor cells *in vitro*. Subsequently, many other tumor cell lines were found to be inhibited *in vivo* by anti-VEGF monoclonal antibodies (321–327). Tumor growth inhibition was demonstrated also with other anti-VEGF treatments, including a retrovirus-delivered dominant negative Flk-1 mutant (328), small molecule inhibitors of VEGFR-2 signaling (329–331), antisense oligonucleotides (332, 333), anti-VEGFR-2 antibodies (334), and soluble VEGF receptors (335–339).

Tumors of endocrine origin are also substantially growth inhibited by anti-VEGF treatment. Treatment with an anti-human VEGF monoclonal antibody resulted in more than 90% inhibition of tumor growth in a model of thyroid cancer (340). Also, administration of PTK787, a small molecule VEGFR-2 kinase inhibitor, led to a 41% reduction of tumor volume in a nude mouse model of poorly differentiated thyroid carcinoma (341).

Although tumor cells usually represent the major source of VEGF, tumor-associated stroma is also an important site of VEGF production (337, 342–344). As illustrated in Fig. 7, chemotactic signals from tumor cells recruit stromal cells, which also produce VEGF and other angiogenic factors. The growth of a variety of human tumor cell lines transplanted in nude mice is substantially reduced, but not completely suppressed, by antihuman VEGF monoclonal antibodies (320). Administration of mFlt (1–3)-IgG, a chimeric receptor containing the first three Ig-like domains of VEGFR-1, that binds both human and mouse VEGF, results in a nearly complete suppression of tumor growth, accompanied by dramatic tumor cells necrosis, in a nude mouse model of human rhabdomyosarcoma (Fig. 8) (337). Similar results were obtained using a chimeric soluble receptor consisting of domain 2 of VEGFR-1 fused with domain 3 of VEGFR-2, referred to as “VEGF-trap” (339). Therefore, the use of VEGF inhibitors that only target human VEGF in human xenograft models

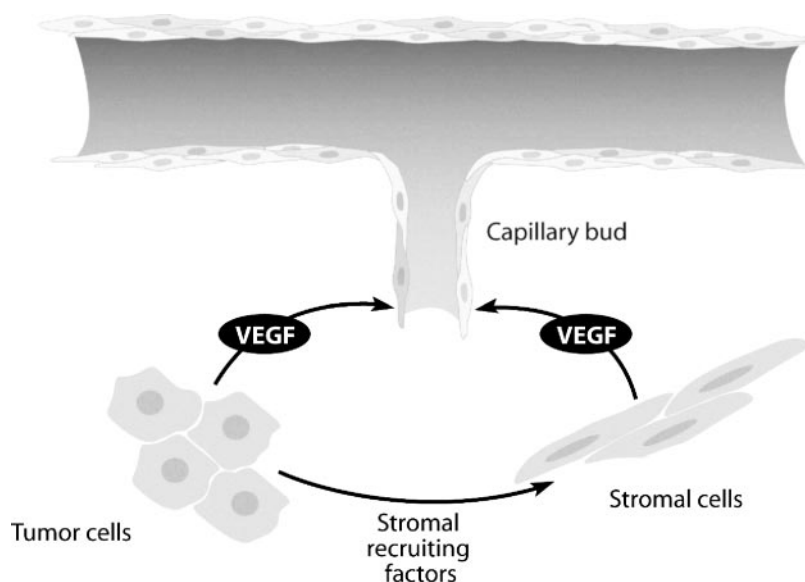

FIG. 7. Both tumor and stromal VEGF contribute to tumor angiogenesis. In response to chemotactic stimuli, stromal cells are recruited into the tumor and produce VEGF and other angiogenic factors.

frequently results in underestimating the contribution of VEGF to the process of tumor angiogenesis.

Cre-LoxP-mediated gene targeting has been used to show that VEGF inactivation suppresses tumor angiogenesis in the Rip-Tag model, a well-established genetic model of insulinoma (345). Furthermore, at least in the Rip-Tag model, MMP-9-mediated proteolytic events have been shown to determine an “angiogenic switch,” mediated by enhancement of the activity of low constitutive levels of VEGF that become available to bind VEGFR-2 (265, 346).

Several studies have shown that combining anti-VEGF treatment with chemotherapy (347) or radiation therapy (348, 349) results in greater antitumor effects than either treatment alone. An issue that is being debated is the mechanism of such potentiation, and various hypotheses, not mutually exclusive, have been proposed. Klement *et al.* (347) proposed that chemotherapy, especially when delivered at low doses, preferentially damages endothelial cells, and the blockade of VEGF blunts a key survival signal for endothelial cells, thus amplifying the antitumor cell effects of chemotherapy. Jain (350) proposed that antiangiogenic therapy “normalizes” the tumor vasculature, leading to pruning of excessive endothelial cells and perivascular cells, reduction in vessel tortuosity, and drop in interstitial pressure and improved delivery of chemotherapy to tumor cells. These effects would provide an explanation for the apparent paradox that administration of VEGF inhibitors leads to a reduction in vascular permeability (79, 351), which would be expected to reduce the delivery of protein-bound chemotherapy into the tumor cells.

Most recently, Willett *et al.* (352) have shown that VEGF blockade using an anti-VEGF monoclonal antibody (bevacizumab) decreases tumor perfusion, vascular volume, microvascular density, interstitial fluid pressure, and the number of viable, circulating endothelial and progenitor cells in colorectal cancer patients, providing direct evidence for antivasculature effects after VEGF blockade.

Clinical trials in cancer patients are ongoing with several VEGF inhibitors, including a humanized anti-VEGF mono-

clonal antibody (rhuMab VEGF; bevacizumab; Avastin, Genentech, South San Francisco, CA) (353), an anti-VEGFR-2 antibody (334), small molecules inhibiting VEGFR-2 signal transduction (330, 331), and a VEGFR chimeric protein (339). Phase II clinical data provided initial evidence that bevacizumab, in combination with 5-fluorouracil/leucovorin, results in increase in time to progression and survival in patients with metastatic colorectal carcinoma (CRC) (258). Thrombosis and increased blood pressure, as well as some proteinuria, were among the side effects of treatment observed in such a trial.

A double-blind placebo-controlled phase II trial demonstrated a significant increase in time to progression in renal cell carcinoma patients treated with bevacizumab as a single agent (36). Interestingly, the toxicity of the treatment was very modest and consisted of asymptomatic proteinuria and hypertension. In light of the fact that many renal cell carcinoma patients harbor mutations in the VHL gene, which result in altered regulation of VEGF (145), these results are particularly significant.

Recently, Hurwitz *et al.* (37) presented the results of a large randomized placebo-controlled phase III trial in which bevacizumab was tested in combination with chemotherapy as first-line therapy for previously untreated metastatic CRC. Patients were randomized to receive weekly bolus irinotecan, 5-fluorouracil, and leucovorin (IFL) plus bevacizumab (5 mg/kg every 2 wk), or IFL plus bevacizumab placebo. Survival was significantly increased in the IFL/bevacizumab arm compared with the IFL/placebo arm. Progression-free survival, response rate, and duration of response were also significantly increased in the bevacizumab group. Hypertension was more common in the IFL/bevacizumab-treated group but was readily managed in all cases with oral antihypertensive agents (37). Interestingly, the increased incidence of thrombosis and proteinuria, which was observed in phase II, was not observed in this phase III study. The prolongation of survival and improvement in other markers of clinical benefit observed with the addition of bevacizumab to standard chemotherapy confirms the importance of angio-



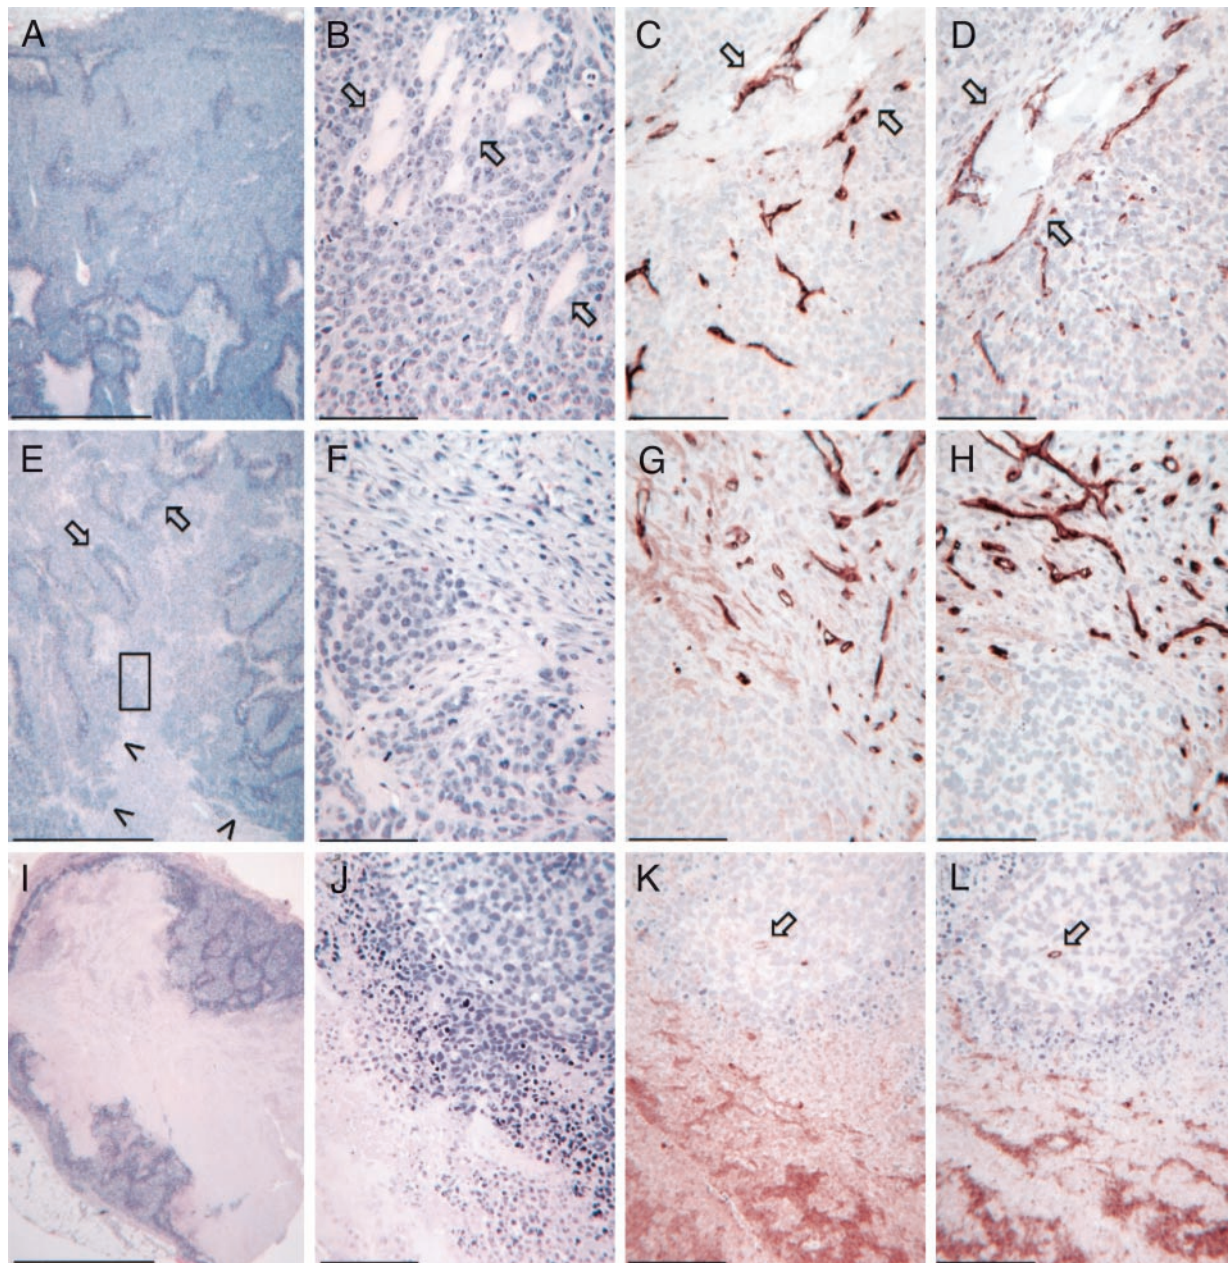

FIG. 8. Complete suppression of tumor angiogenesis requires inhibition of both tumor and stromal VEGF in a nude mouse model of human A673 rhabdomyosarcoma. To test whether the incomplete inhibition of tumor growth achieved with systemic administration of an antihuman VEGF monoclonal antibody is due to incomplete tumor penetration of the antibody or up-regulation of host-derived murine VEGF, systemic administration of the antibody was performed in conjunction with intratumoral administration of an antihuman VEGF Fab (E–H) or mFlt(1–3)-IgG (I–L), which blocks both human and mouse VEGF. A–D, Control antibody. Note the extensive tumor cell necrosis in the mFlt(1–3)-IgG-treated animals (panels I and J), which is not observed in the other groups, although the monoclonal antibody treatment resulted in more than 90% inhibition of tumor growth. Systemic administration of mFlt(1–3)-IgG as a single agent resulted in tumor cell necrosis indistinguishable from that induced by intratumoral mFlt(1–3)-IgG. Note also the nearly complete suppression of vascularization in the mFlt(1–3)-IgG-treated group, as assessed by two vascular-specific markers, Flk-1 (C, G, and K) and CD31 (D, H, and L). Arrows in B point to entrapped host-derived elements such as skeletal muscle fibers. Arrows in C and D point to microvessels, often present in greater number around host-entrapped elements. Arrows in E point to pyknotic areas, staining more deeply than the viable tumor, at the interface between viable and necrotic regions. However, other regions (box and arrowheads) in E lack such pyknotic changes. Arrows in K and L point to a single blood vessel visible within viable tumor, verifying the dramatic reduction in vascularization. [Reproduced with permission from H. P. Gerber *et al.*: *Cancer Res.* 60:6253–6258, 2000 (337).]

genesis in the clinical outcome of patients with CRC. Based on these results, Avastin was approved by the Food and Drug Administration on February 26, 2004 as a first-line treatment for metastatic CRC.

Several additional phase III studies are currently ongoing to fully assess the benefit of bevacizumab and other anti-VEGF therapies, such as small-molecule kinase inhibitors, in patients with advanced cancer.



### B. Hematological malignancies

VEGF is expressed in a wide variety of cell lines derived from various hematological malignancies, including T cell lymphoma, acute lymphoblastic leukemia, Burkitt's lymphoma, acute lymphocytic leukemia, histiocytic lymphoma, promyelocytic leukemia, *etc.* (for review see Ref. 354). Expression of both VEGFRs has been detected in some, but not all, leukemia cell lines, and VEGFR-1 was found to be more frequently expressed than VEGFR-2. These findings suggest that the production of VEGF by malignant myeloid precursors might serve both as an autocrine growth stimulus and a diffusible, paracrine, signal-mediating angiogenesis within the bone marrow. The inhibitory effects of small molecule inhibitors targeting VEGFR-1 and VEGFR-2 on the growth of human myeloid leukemia cell lines have been documented (355). Further evidence for a functional role of VEGFR-2 in leukemic cell growth was provided by experiments showing that an anti-VEGFR-2 antibody inhibits proliferation of xenotransplanted human leukemia cells and significantly increased survival of nude mice (356). Recently, Fiedler *et al.* (357) reported a multicenter phase II trial of SU5416, a small-molecule inhibitor of phosphorylation of VEGF receptors, c-kit, the SCF receptor, and FLT3 in patients with advanced acute myelogenous leukemia, and some preliminary evidence of efficacy was evidenced. One patient had a morphological remission lasting for 2 months, and seven patients achieved a partial response. Interestingly, patients with acute myelogenous leukemia blasts expressing high levels of VEGF had a higher response rate and reduction of bone marrow microvessel density than patients with low VEGF expression, consistent with the antiangiogenic effects of SU5416. Taken together, these findings suggest that inhibition of VEGF or VEGFR signaling may be effective in the treatment of hematological malignancies. Currently, several clinical trials are testing this hypothesis.

### C. Intraocular neovascular syndromes

Diabetes mellitus, occlusion of central retinal vein, or prematurity with subsequent exposure to oxygen can all be associated with retinal ischemia and intraocular neovascularization, which may result in vitreous hemorrhages, retinal detachment, neovascular glaucoma, and blindness (11, 358). As previously mentioned, in 1948 Michaelson (40) postulated the existence of a diffusible angiogenic factor, released by the ischemic retina. Given its hypoxia inducibility, VEGF became an attractive candidate as a mediator of pathological intraocular neovascularization.

Hypoxia-regulated VEGF release likely plays a key role in the normal development of the retinal vasculature. Stone *et al.* (359) proposed that hypoxia caused by the onset of neuronal activity leads to the release of VEGF by populations of astrocytes, resulting in induction of the superficial and deep layers of retinal vessels. As vessels become patent and perfusion begins, the hypoxic stimulus recedes. Retinal vessels are initially dependent on VEGF as a survival factor (75), but such dependence is lost as soon as capillaries are covered by pericytes, a process mediated by endothelial cell-derived PDGF-BB acting through PDGFR $\beta$  (360, 361).

Expression of VEGF mRNA spatially and temporally cor-

relates with neovascularization in several animal models of retinal ischemia (75, 362, 363). Interestingly, down-regulation of VEGF expression by hyperoxia is likely to be, at least in part, responsible for the vasoobliteration and cessation of normal retinal blood vessel growth observed in premature infants in whom retinopathy of prematurity develops (75, 363). The subsequent retinal hypoxia leads to VEGF up-regulation and neovascularization, when normoxia is restored. Administration of VEGF during the hyperoxic phase significantly prevented the vascular regressive changes and the neovascularization (75, 363).

Elevations of VEGF levels in the aqueous and vitreous humor of human eyes with proliferative retinopathy secondary to diabetes and other conditions have been previously described (364, 365). Similar to the animal models, these studies demonstrated a temporal correlation between VEGF elevations and active proliferative retinopathy (364). Subsequently, animal studies using various VEGF inhibitors, including soluble VEGF receptor chimeric proteins (366), monoclonal antibodies (367), antisense oligonucleotides (368), and small molecule VEGFR-2 kinase inhibitors (369), have directly demonstrated the role of VEGF as a key mediator of ischemia-induced intraocular neovascularization. Activation of protein kinase C  $\beta$  2 isoform has been reported to be important for VEGF-dependent retinal neovascularization (370).

Neovascularization and vascular leakage are major causes of visual loss also in the wet form of AMD, the overall leading cause of blindness (11). Earlier studies demonstrated the immunohistochemical localization of VEGF in surgically resected choroidal neovascular membranes from AMD patients (371), suggesting a role for VEGF in the progression of AMD-related choroidal neovascularization. Whether such VEGF up-regulation is hypoxia related is unclear (372). Currently, anti-VEGF strategies are being explored in clinical trials in AMD patients, using either a recombinant humanized anti-VEGF Fab (rhuFab VEGF) (373) or 2'-fluoropyrimidine RNA oligonucleotide ligand (aptamers) (374). rhuFab VEGF has been recently found to reduce angiogenesis and vascular leakage in a primate model of AMD (375). Both the aptamer and rhuFab VEGF, administered intravitreally, are currently in phase III trials. Most recently, preliminary results of a phase III study with Macugen (Eyetechnology, Boston, MA) (aptamer) in patients with wet AMD indicate reduced vision loss compared with placebo (C. Puliafito: Abstract Proc. American Academy of Ophthalmology Subspecialty Day - Retina The Retina Debates 2003: New Technology & Controversies from the Posterior Segment). However, the magnitude of the effect did not appear markedly greater than that achieved by photodynamic therapy (Visudyne, QLT, Vancouver, British Columbia, Canada), the only approved treatment for wet AMD. However, Macugen neutralizes only intact VEGF<sub>165</sub> and does not bind VEGF<sub>121</sub> or bioactive proteolytic fragments of VEGF<sub>165</sub> lacking the heparin-binding domain that may be generated after plasminogen activation (374). In contrast, rhuFab VEGF neutralizes all VEGF isoforms and bioactive fragments (373). Whether a more complete VEGF neutralization will translate in greater clinical efficacy remains to be established. For review of anti-VEGF approaches in AMD clinical trials, see Ref. 372.

VEGF is implicated also in the corneal angiogenesis associated with herpes simplex infection (376). After viral infection in mice, VEGF was expressed by stromal as well as by corneal epithelial cells. Administration of a soluble VEGF receptor markedly reduces angiogenesis and severity of lesions associated with the viral infection, suggesting that the control of angiogenesis represents a useful adjunct to therapy of herpetic ocular disease, an important cause of human blindness (376).

#### D. Inflammatory disorders and brain edema

VEGF up-regulation has been implicated in various inflammatory disorders (for review see Ref. 34). VEGF is strongly expressed by epidermal keratinocytes in wound healing and psoriasis, conditions that are characterized by increased microvascular permeability and angiogenesis (377). Transgenic overexpression of VEGF in the skin results in increased density of tortuous cutaneous blood capillaries and enhanced leukocyte rolling and adhesion in postcapillary skin venules, suggesting that overexpression of VEGF in the epidermis is sufficient to induce features of chronic skin inflammation. Interestingly, no changes in lymphatic vessels were detected in these studies (378). Very recent studies have shown, however, that myeloid cell activation and infiltration, key aspects of acute inflammatory responses, require HIF-1 $\alpha$  but are largely independent of VEGF (379).

VEGF has been implicated also in the pathogenesis of RA, an inflammatory disease in which angiogenesis plays a significant role (380, 381). Levels of immunoreactive VEGF were found to be high in the synovial fluid of RA patients, whereas they were very low or undetectable in the synovial fluid of patients affected by other forms of arthritis or by degenerative joint disease (380, 381). Interestingly, administration of VEGF inhibitors significantly delayed the development of arthritis and decreased clinical score and paw thickness as well as histological severity (382–384). Recent studies have also emphasized the importance of VEGFR-1 signaling in the development of an inflammatory exudate in RA (385–387).

Recently, Reinders *et al.* (388) provided evidence for a role of VEGF as a proinflammatory mediator in allograft rejection. VEGF was found to be functional in the trafficking of human T cells into skin allografts *in vivo* in the humanized SCID mouse. *In vitro*, VEGF enhanced endothelial cell expression of several chemokines and, in combination with interferon- $\gamma$  (IFN- $\gamma$ ), synergistically induced endothelial cell production of the potent T cell chemoattractant IFN- $\gamma$ -inducible protein-10 (IP-10). Treatment of BALB/c recipients of fully major histocompatibility complex-mismatched C57BL/6 donor hearts with an anti-VEGF antibody markedly reduced T cell infiltration of allografts and acute rejection (388).

VEGF up-regulation has been also implicated in the development of brain edema. Diffuse, low-abundance, VEGF mRNA expression has been observed in the adult rat brain (389). However, as previously noted, hypoxia is a major trigger for VEGF expression, and enhanced levels of VEGF, together with VEGFR-1 and VEGFR-2, have been reported by several groups in the rat brain after the induction of focal cerebral ischemia (390–392). Because brain edema is a major determinant of morbidity in patients with cerebral ischemia,

the hypothesis that VEGF blockade may be beneficial was tested. van Bruggen *et al.* (393) have shown that administration of a soluble VEGF receptor has beneficial effects in a murine model of cortical ischemia, resulting in a significant reduction in the volume of the edematous tissue shortly after the onset of ischemia and in the infarct size measured several weeks later. As previously noted, some members of the src family may mediate VEGF-dependent vascular permeability (111). In this context, Paul *et al.* (394) reported that src<sup>-/-</sup> mice have reduced brain damage after induction of cortical ischemia and that a src inhibitor has protective effects in wild-type mice in a similar brain injury model. However, other studies have shown that infusion of VEGF itself may have protective effects in similar models, reducing infarct size (395) and even brain edema formation (396) by virtue of its endothelial and possibly also neuronal protective effects. Such conflicting results likely reflect a “double-edged sword” role of VEGF in stroke, such that the timing of administration and the dose of VEGF (or the VEGF inhibitor) will determine whether the treatment will be beneficial or detrimental.

#### E. Pathology of the female reproductive tract

Angiogenesis is a prominent feature of polycystic ovary syndrome (PCOS), a leading cause of infertility affecting as many as 5–10% of women of reproductive age. PCOS was originally described as a disorder characterized by the association of hirsutism, obesity, reduced fertility, and enlarged, polycystic ovaries (397). Hyperplasia of the theca interna and stroma and excessive production of androgens are hallmarks of PCOS (for review see Ref. 398). Indeed, ultrasonographic assessment of stromal area (399) and blood flow (400) is currently used as a diagnostic test. Although PCOS was described more than 50 yr ago, its etiology has remained largely unclear. However, increased LH/FSH ratio, defective selection of a dominant follicle, and anovulation are considered to be key aspects of the pathogenesis. Recent evidence also indicates that PCOS is part of a complex endocrine/metabolic disorder in which insulin resistance plays a major role (401).

Interestingly, VEGF levels have been reported to be elevated in the serum of PCOS patients compared with normal controls, although the degree of increase varied among different studies, being as little as 25% (402) or approximately 2- to 3-fold (403). *In situ* analysis indicated that both VEGF and EG-VEGF are expressed in all PCOS ovaries examined, but with an almost mutually exclusive expression pattern (288, 404). Somewhat surprisingly, expression of VEGF mRNA is largely limited to the cyst walls, with little or no expression in the stroma. Cysts appear to express VEGF only, EG-VEGF only, or to express VEGF in an inner rim surrounded by an outer rim of EG-VEGF expression. Some VEGF expression was seen in theca interna, although not as consistently as in granulosa cells (Fig. 9). EG-VEGF expression was strongest in theca interna of follicles in various stages of atresia. Importantly, thecal and stromal tissue expressing EG-VEGF maintain an abundant vascular supply, despite lacking significant VEGF expression. Endothelial immunostaining with anti-CD34 demonstrates persistent vas-

cularity in these areas (288). These findings raise the possibility that, whereas VEGF is an essential player in normal cycling ovaries, EG-VEGF might be particularly significant for the acyclical angiogenesis occurring during chronic anovulation. However, tumor studies have shown that even a low, constitutive VEGF expression may be of great pathophysiological significance as assessed by loss of function studies (343). Therefore, studies with specific inhibitors will be crucial to determine the respective roles of VEGF and EG-VEGF in models of ovarian dysfunction.

Previous studies (405, 406) have implicated VEGF also in the pathogenesis of ovarian hyperstimulation syndrome (OHSS), a potentially fatal condition characterized by ovarian enlargement, with multiple follicular cysts and increased vascular permeability (407, 408). PCOS is a well-established risk factor for OHSS (409). However, other studies have cast doubt on the hypothesis that VEGF may be the causative factor in the vascular permeability associated with OHSS and suggested that the kallikrein system is of greater importance (410). Such discrepancies may be due, at least in part, to the fact that although VEGF may be an important mediator in OHSS, it is by itself insufficient, and the symptoms reflect the contribution of other factors, such as EG-VEGF.

Angiogenesis is important in the pathogenesis of endometriosis, a condition characterized by ectopic endometrium implants in the peritoneal cavity. High levels of VEGF have been measured in the peritoneal fluid of patients with endometriosis (411–413). Recently, a model in which human endometrium is implanted into nude mice was used to test the effects of two VEGF inhibitors, a soluble truncated Flt-1 receptor and an antibody to human VEGF. Both agents significantly inhibited the growth of nude mouse explants, suggesting that antiangiogenic agents may provide a novel therapeutic approach for the treatment of endometriosis (413).

According to Maynard *et al.* (414), circulating levels of sFlt-1 derived from placenta are increased in preeclampsia, resulting in reduced free VEGF and PlGF. Thus, endothelial dysfunction of preeclampsia may be due to excess VEGF/PlGF neutralization by circulating sFlt-1. Furthermore, recent studies have indicated that increased levels of sFlt-1 and reduced levels of PlGF predict the subsequent development of preeclampsia (415).

## X. VEGF and Therapeutic Angiogenesis

The development of pharmacological treatments for disorders characterized by inadequate tissue perfusion would fulfill an unmet medical need, as there are no effective alternatives to surgical reconstruction procedures. For example, chronic limb ischemia, most frequently caused by obstructive atherosclerosis affecting the superficial femoral artery, is associated with a high rate of morbidity and mortality, and treatment is currently limited to surgical revascularization or endovascular interventional therapy (416). The hypothesis that “therapeutic angiogenesis” may be beneficial for these conditions generated a high level of enthusiasm in the field of cardiovascular medicine over the last several years and led to several clinical trials.

Early studies indicated that intraarterial or im adminis-

tration of VEGF<sub>165</sub> may significantly augment perfusion and development of collateral vessels in a rabbit model of chronic hindlimb ischemia (417). Arterial gene transfer with cDNA encoding VEGF also led to revascularization in the same rabbit model to an extent comparable to that achieved with the recombinant protein (418, 419). Other studies have shown that VEGF administration also leads to a recovery of normal endothelial reactivity in dysfunctional endothelium (420). Furthermore, adenovirus-delivered VEGF<sub>165</sub> stimulated an angiogenic response that protected against acute vascular occlusion in the setting of preexisting limb ischemia in a rat model (421). VEGF gene transfer was also reported to prevent the ischemic peripheral neuropathy associated with lower extremity vascular insufficiency in a rabbit model (422). In addition, extraluminal administration of as little as 2 µg of recombinant human VEGF was reported to result in a significant increase in coronary blood flow in a pig model of chronic myocardial ischemia (423). Adenoviral-mediated gene transfer of VEGF<sub>121</sub> has also been found to result in collateral vessel growth and functional improvement in a porcine model (424).

The hypothesis that VEGF may result in therapeutically significant angiogenesis in humans was initially tested by Isner *et al.* (425) using a gene therapy approach. Arterial gene transfer of naked plasmid DNA encoding VEGF<sub>165</sub> was reported to result in angiographic and histological evidence of angiogenesis in the knee midtibial and ankle levels 4 wk after the transfer in a single patient with severe limb ischemia. In a subsequent study, the VEGF<sub>165</sub> cDNA was injected im in 10 limbs of nine patients with nonhealing ischemic ulcers and/or rest pain due to peripheral arterial disease and was reported to improve distal blood flow in several patients (426). The same group also reported that local injection of naked plasmid DNA encoding VEGF<sub>165</sub> results in a therapeutic effect in patients with myocardial ischemia (427). However, none of these studies were placebo controlled. A relatively large (174 patients) placebo-controlled phase II study in which recombinant human VEGF<sub>165</sub> was delivered as a single intracoronary infusion, followed by three iv injections, did not demonstrate clinical benefit. The treatment was not superior to the placebo in treadmill time and pain relief, at least at a 60-d assessment, although some improvement in angina class was measured at a later time point (117). This study indicated that the placebo effect is considerably greater than initially suspected and that even patients with markedly compromised myocardial function may show, at least initially, a significant improvement in response to placebo. A major difference between animal models and human patients may lie in the fact that young and otherwise healthy animals are able to mount an effective endogenous angiogenic response that can be maximized by an additional stimulus provided by recombinant protein or gene therapy, whereas patients with extensive atherosclerotic disease may have an impaired response to endogenous and exogenous factors. However, an increase in vascularity was recently reported in a controlled trial with adenovirus-mediated delivery of VEGF<sub>165</sub> in limb ischemia patients (428).

Currently, several laboratories are exploring the possibility that a more persistent exposure than that achieved in the early trials may achieve better results. In this context, recent



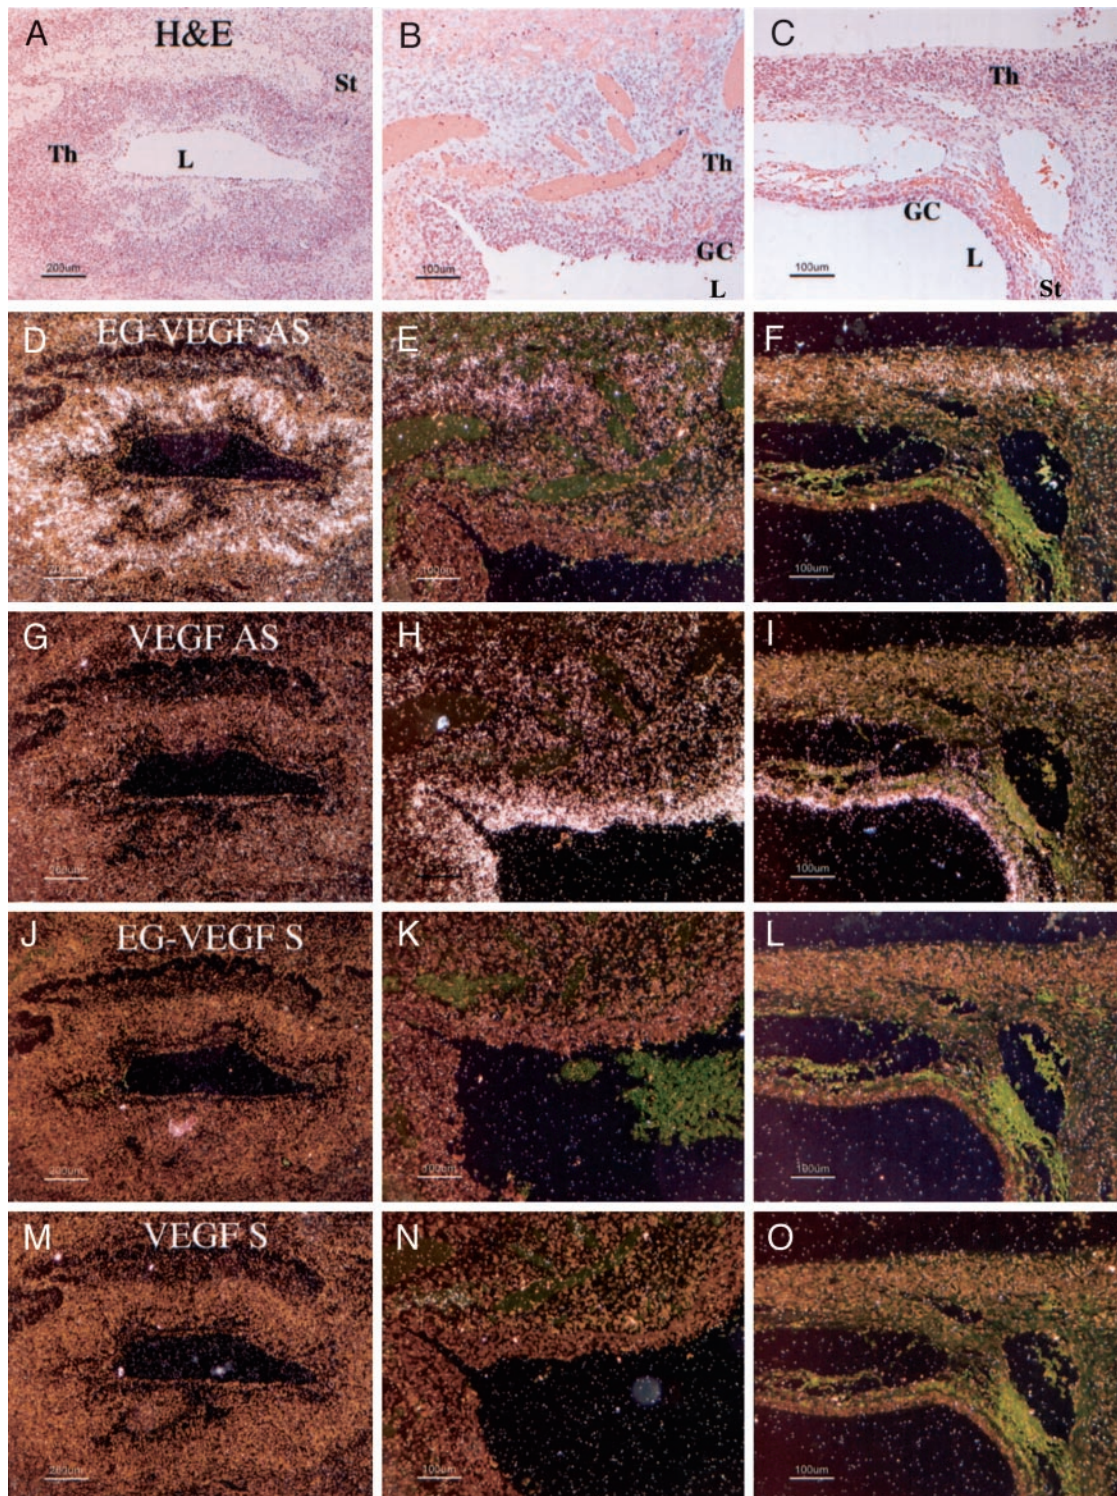

FIG. 9. Distribution of VEGF and EG-VEGF mRNA in parallel sections of cysts in individual PCOS ovaries. Parallel sections were hybridized with EG-VEGF antisense (D–F), VEGF antisense (G–I), EG-VEGF sense (J–L), and VEGF sense (M–O) riboprobes. Hematoxylin and eosin (H&E) images (A–C) are shown for reference. Panels A, D, G, J, and M, Detail of late-stage atretic follicle; EG-VEGF (D) is strongly expressed in theca cells surrounding follicle lumen in which the granulosa cell layer has degenerated. Panels B, E, H, K, and N, Detail of early-stage atretic follicle; VEGF (H) is strongly expressed in granulosa cells surrounding the follicle lumen; some surrounding thecal cells are weakly VEGF positive; EG-VEGF (C) is expressed in clusters of surrounding thecal cells. VEGF (I) is strongly expressed in granulosa cells surrounding lower follicle lumen; the surrounding thin layer of thecal cells are weakly VEGF positive, and EG-VEGF (F) is expressed in the thecal cells of the upper follicle in which the granulosa cell layer has degenerated. GC, Granulosa cells; Th, theca; St, stroma; L, lumen. Scale bars are 200  $\mu$ m (A, D, G, J, and M) and 100  $\mu$ m (B, C, E, F, H, I, K, L, N, and O). [Reproduced with permission from N. Ferrara *et al.*: *Am J Pathol* 162:1881–1893, 2003 (288).]



studies using a conditional VEGF switch have shown that early cessation of the VEGF stimulus results in regression of newly formed vessels in the heart or in the liver. However, after a critical duration of exposure, the vessels persisted for months after VEGF withdrawal and resulted in an improvement in organ perfusion (429). Furthermore, a combination of growth factors offers the theoretical advantage of recapitulating at least some of the events leading to the correct assembly of the vessel wall. Coadministration of VEGF and angiopoietin-1 has been proposed to result in more normal and less leaky vessels than those induced by VEGF alone (430). Likewise, delivery of both bFGF and PDGF-BB has been reported to result in the induction of stable vascular networks in a model of limb ischemia (431).

A greater understanding of the differential role of VEGF receptors may open additional avenues. In particular, recent studies have emphasized that VEGFR-1, a molecule with highly complex and apparently conflicting roles, possesses important activities in hematopoiesis and in the recruitment of mononuclear cells. The fact that VEGFR-1 activation is associated with fewer side effects relative to VEGF makes it a particularly attractive target. Furthermore, the recent report that a VEGFR-1 agonist protects the liver from toxic damage, by instructing the quiescent endothelium to produce a series of tissue-specific growth factors, extends the potential clinical applications of VEGFR-1 agonists (217).

Other activities of VEGF may have interesting clinical implications. For example, on the basis of the key role played by VEGF in angiogenesis and endochondral bone formation (258), the application of this factor might be useful to enhance revascularization and healing of fractures and other skeletal conditions (for review, see Ref. 270). Recent studies have shown that both recombinant (266) and adenovirus-delivered (432) VEGF leads to enhanced blood vessel formation and ossification in models of bone damage. Figure 10 illustrates the effects of recombinant VEGF in a rabbit model of segmental gap defect.

## XI. Perspectives

The VEGF family clearly plays an essential role in the regulation of embryonic and postnatal physiological angio-

genesis processes, such as normal growth processes (83, 260) and cyclical ovarian function (167). Furthermore, VEGF inhibition has been shown to suppress pathological angiogenesis in a wide variety of models, including genetic models of cancer, leading to the clinical development of a variety of VEGF inhibitors. An important question is what impact VEGF inhibition will have in human patients, especially those with highly advanced malignancies. Initial encouraging phase II results were followed by setbacks, such as the lack of efficacy of SU5416 in a phase III study in metastatic CRC in combination with chemotherapy, or the lack of survival benefit in patients with refractory metastatic breast cancer treated with bevacizumab plus chemotherapy as a third-line therapy (433). Most recently, however, a large phase III study has provided unequivocal evidence that VEGF inhibition, using bevacizumab in combination with chemotherapy, may provide a substantial clinical benefit, including increased survival, in patients with previously untreated metastatic CRC (37). Bevacizumab is the first anti-angiogenic agent to be approved by the Food and Drug Administration as a cancer therapy.

It is unclear at present whether such differences in response to bevacizumab reflect a different biology/angiogenic profile between breast and CRC or simply a reduced response in more advanced disease. However, progression eventually occurs in many CRC patients, raising the question of what might mediate angiogenic escape after VEGF inhibition, although one cannot rule out the possibility that a different dosage/regimen of bevacizumab might achieve even greater efficacy. Different angiogenic mechanisms might be differentially important at various stages of the neoplastic progression, and some data suggest that VEGF may be especially important in the initial stages (434). Such a notion may be useful for the design of further clinical trials. The existence of organ-specific angiogenic pathways may be particularly important in some endocrine tumors, in which both VEGF and EG-VEGF are highly expressed (286).

Recent studies have proposed that pericyte recruitment into tumor vasculature, a process dependent on PDGFR $\beta$  signaling, is a mechanism of resistance in late-stage tumors to therapies that only target VEGF (435). These findings suggest that combination therapies that target both VEGF

FIG. 10. VEGF promotes bone repair. Three-dimensional (3D) renderings of CT images of radius critical defects at 28 d in vehicle and VEGF (250  $\mu$ g)-treated rabbits. Segmental defects in rabbit radii were created, and animals were implanted with a pump with various doses of VEGF (0, 50, 100, 250, and 1000  $\mu$ g) continuously released over the first 7 d after surgery. Consistent with the critical size (10 mm) of these defects, vehicle-treated defects were not able to create a bony bridge across the gap. In contrast, VEGF treatment caused significant filling with bone. VEGF, at 250  $\mu$ g, caused a 91% increase ( $P = 0.02$ ) in total callus volume and a 95% increase ( $P = 0.02$ ) in calcified callus volume. [Adapted with permission from Street *et al.*: *Proc Natl Acad Sci USA* 99:9656–9661, 2002 (266). © National Academy of Sciences, U.S.A.]

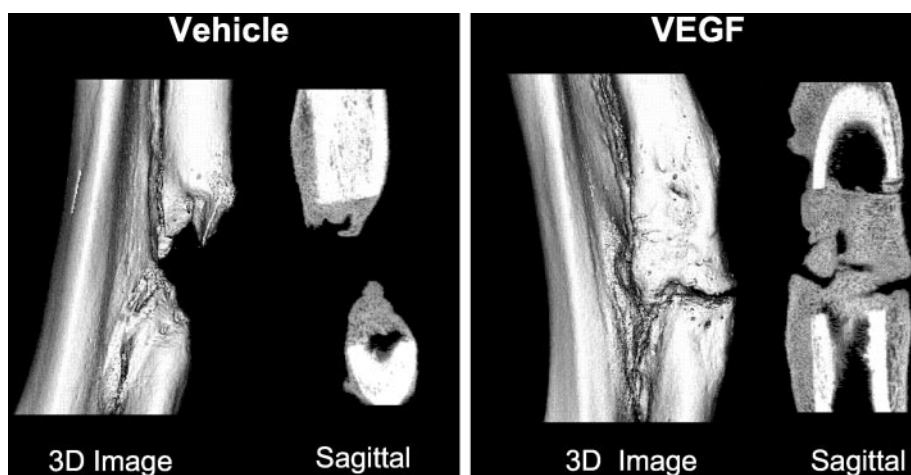

and PDGF may be promising. Furthermore, reliable markers that can predict which patients are more likely to respond to anti-VEGF therapy (or other antiangiogenic treatments) would be of utmost importance, but so far they have been elusive.

The potential clinical utility of VEGF inhibition is not limited to cancer. Trials in AMD patients are already in phase III and, as already noted, initial evidence indicates that the treatment has efficacy. Furthermore, gynecological conditions such as endometriosis or PCOS might also benefit from this approach.

Finally, the recent progress in the molecular and biological understanding of blood vessel growth and differentiation raises hope that a return to human trials for therapeutic angiogenesis may be more rewarding than the early attempts.

### Acknowledgments

Address all correspondence and requests for reprints to: Napoleone Ferrara, M.D., Department of Molecular Oncology, Genentech, Inc., 1 DNA Way, South San Francisco, California 94080. E-mail: nf@gene.com

### References

- Hamilton WJ, Boyd JD, Mossmann HW 1962 Human embryology. Baltimore: Williams & Wilkins
- Risau W, Flamme I 1995 Vasculogenesis. *Annu Rev Cell Dev Biol* 11:73–91
- Risau W 1997 Mechanisms of angiogenesis. *Nature* 386:671–674
- Asahara T, Murohara T, Sullivan A, Silver M, van der Zee R, Li T, Witzenbichler B, Schatteman G, Isner JM 1997 Isolation of putative progenitor endothelial cells for angiogenesis. *Science* 275:964–967
- Rafii S, Meeus S, Dias S, Hattori K, Heissig B, Shmelkov S, Rafii D, Lyden D 2002 Contribution of marrow-derived progenitors to vascular and cardiac regeneration. *Semin Cell Dev Biol* 13:61–67
- De Palma M, Venneri MA, Roca C, Naldini L 2003 Targeting exogenous genes to tumor angiogenesis by transplantation of genetically modified hematopoietic stem cells. *Nat Med* 9:789–795
- Garcia-Barros M, Paris F, Cordon-Cardo C, Lyden D, Rafii S, Haimovitz-Friedman A, Fuks Z, Kolesnick R 2003 Tumor response to radiotherapy regulated by endothelial cell apoptosis. *Science* 300:1155–1159
- Lyden D, Hattori K, Dias S, Costa C, Blaikie P, Butros L, Chadburn A, Heissig B, Marks W, Witte L, Wu Y, Hicklin D, Zhu Z, Hackett NR, Crystal RG, Moore MA, Hajjar KA, Manova K, Benezra R, Rafii S 2001 Impaired recruitment of bone-marrow-derived endothelial and hematopoietic precursor cells blocks tumor angiogenesis and growth. *Nat Med* 7:1194–1201
- Ruzinova MB, Schoer RA, Gerald W, Egan JE, Pandolfi PP, Rafii S, Manova K, Mittal V, Benezra R 2003 Effect of angiogenesis inhibition by Id loss and the contribution of bone-marrow-derived endothelial cells in spontaneous murine tumors. *Cancer Cell* 4:277–289
- Folkman J 1995 Angiogenesis in cancer, vascular, rheumatoid and other disease. *Nat Med* 1:27–31
- Garner A 1994 Vascular diseases. In: Garner A, Klintworth GK, eds. *Pathobiology of ocular disease*. New York: Marcel Dekker; 1625–1710
- Palade GE, Simionescu M, Simionescu N 1979 Structural aspects of the permeability of the microvascular endothelium. *Acta Physiol Scand Suppl* 463:11–32
- Ferrara N 2002 VEGF and the quest for tumour angiogenesis factors. *Nat Rev Cancer* 2:795–803
- Yancopoulos GD, Davis S, Gale NW, Rudge JS, Weigand SJ, Holash J 2000 Vascular-specific growth factors and blood vessel formation. *Nature* 407:242–248
- Carmeliet P 2003 Angiogenesis in health and disease. *Nat Med* 9:653–660
- Jain RK 2003 Molecular regulation of vessel maturation. *Nat Med* 9:685–693
- Maglione D, Guerriero V, Viglietto G, Delli-Bovi P, Persico MG 1991 Isolation of a human placenta cDNA coding for a protein related to the vascular permeability factor. *Proc Natl Acad Sci USA* 88:9267–9271
- Maglione D, Guerriero V, Viglietto G, Ferraro MG, Aprelikova O, Alitalo K, Del Vecchio S, Lei KJ, Chou JY, Persico MG 1993 Two alternative mRNAs coding for the angiogenic factor, placenta growth factor (PlGF), are transcribed from a single gene of chromosome 14. *Oncogene* 8:925–931
- Olofsson B, Pajusola K, Kaipainen A, von Euler G, Joukov V, Saksela O, Orpana A, Pettersson RF, Alitalo K, Eriksson U 1996 Vascular endothelial growth factor B, a novel growth factor for endothelial cells. *Proc Natl Acad Sci USA* 93:2576–2581
- Joukov V, Pajusola K, Kaipainen A, Chilov D, Lahtinen I, Kukk E, Saksela O, Kalkkinen N, Alitalo K 1996 A novel vascular endothelial growth factor, VEGF-C, is a ligand for the Flt4 (VEGFR-3) and KDR (VEGFR-2) receptor tyrosine kinases. *EMBO J* 15:1751–1758
- Lee J, Gray A, Yuan J, Luoh SM, Avraham H, Wood WI 1996 Vascular endothelial growth factor-related protein: a ligand and specific activator of the tyrosine kinase receptor Flt4. *Proc Natl Acad Sci USA* 93:1988–1992
- Orlandini M, Marconcini L, Ferruzzi R, Oliviero S 1996 Identification of a c-fos-induced gene that is related to the platelet-derived growth factor/vascular endothelial growth factor family. *Proc Natl Acad Sci USA* 93:11675–11680
- Achen MG, Jeltsch M, Kukk E, Makinen T, Vitali A, Wilks AF, Alitalo K, Stacker SA 1998 Vascular endothelial growth factor D (VEGF-D) is a ligand for the tyrosine kinases VEGF receptor 2 (Flk1) and VEGF receptor 3 (Flt4). *Proc Natl Acad Sci USA* 95:548–553
- Lytle DJ, Fraser KM, Flemings SB, Mercer AA, Robinson AJ 1994 Homologs of vascular endothelial growth factor are encoded by the poxvirus orf virus. *J Virol* 68:84–92
- Ogawa S, Oku A, Sawano A, Yamaguchi S, Yazaki Y, Shibuya M 1998 A novel type of vascular endothelial growth factor, VEGF-E (NZ-7 VEGF), preferentially utilizes KDR/Flk-1 receptor and carries a potent mitotic activity without heparin-binding domain. *J Biol Chem* 273:31273–31282
- Wise LM, Veikkola T, Mercer AA, Savory LJ, Fleming SB, Caesar C, Vitali A, Makinen T, Alitalo K, Stacker SA 1999 Vascular endothelial growth factor (VEGF)-like protein from orf virus NZ2 binds to VEGFR2 and neuropilin-1. *Proc Natl Acad Sci USA* 96:3071–3076
- Karkkainen MJ, Makinen T, Alitalo K 2002 Lymphatic endothelium: a new frontier of metastasis research. *Nat Cell Biol* 4:E2–E5
- Stacker SA, Achen MG, Jussila L, Baldwin ME, Alitalo K 2002 Lymphangiogenesis and cancer metastasis. *Nat Rev Cancer* 2:573–583
- Ferrara N, Houck K, Jakeman L, Leung DW 1992 Molecular and biological properties of the vascular endothelial growth family of proteins. *Endocr Rev* 13:18–32
- Ferrara N, Davis-Smyth T 1997 The biology of vascular endothelial growth factor. *Endocr Rev* 18:4–25
- Ortega N, Hutchings H, Plouet J 1999 Signal relays in the VEGF system. *Front Biosci* 4:D141–D152
- Neufeld G, Cohen T, Gengrinovitch S, Poltorak Z 1999 Vascular endothelial growth factor (VEGF) and its receptors. *FASEB J* 13:9–22
- Robinson CJ, Stringer SE 2001 The splice variants of vascular endothelial growth factor (VEGF) and their receptors. *J Cell Sci* 114:853–865
- Dvorak HF 2002 Vascular permeability factor/vascular endothelial growth factor: a critical cytokine in tumor angiogenesis and a potential target for diagnosis and therapy. *J Clin Oncol* 20:4368–4380
- Ferrara N, Gerber HP, LeCouter J 2003 The biology of VEGF and its receptors. *Nat Med* 9:669–676



36. Yang JC, Haworth L, Sherry RM, Hwu P, Schwartzentruber DJ, Tapalian SL, Steinberg SM, Chen HX, Rosenberg SA 2003 A randomized trial of bevacizumab, an anti-VEGF antibody, for metastatic renal cancer. *N Engl J Med* 349:427–434
37. Hurwitz H, Fehrenbacher L, Novotny W, Cartwright T, Hainsworth H, Helm W, Berlin J, Griffing S, Holmgren E, Ferrara N, Rogers B, Ross R, Baron A, Kabbinavar F 2004 Bevacizumab plus irinotecan, fluorouracil, and leucovorin for metastatic colorectal cancer. *N Engl J Med* 350:2335–2342
38. Ide AG, Baker NH, Warren SL 1939 Vascularization of the Brown Pearce rabbit epithelioma transplant as seen in the transparent ear chamber. *Am J Roentgenol* 42:891–899
39. Algire GH, Chalkley HW, Legallais FY, Park HD 1945 Vascular reactions of normal and malignant tissues in vivo. I. Vascular reactions of mice to wounds and to normal and neoplastic transplants. *J Natl Cancer Inst* 6:73–85
40. Michaelson IC 1948 The mode of development of the vascular system of the retina with some observations on its significance for certain retinal disorders. *Trans Ophthalmol Soc UK* 68:137–180
41. Greenblatt M, Shubik P 1968 Tumor angiogenesis: transfilter diffusion studies in the hamster by the transparent chamber technique. *J Natl Cancer Inst* 41:111–124
42. Ehrmann RL, Knoch M 1968 Choriocarcinoma. Transfilter stimulation of vasoproliferation in the hamster cheek pouch. Studied by light and electron microscopy. *J Natl Cancer Inst* 41:1329–1341
43. Folkman J 1971 Tumor angiogenesis: therapeutic implications. *N Engl J Med* 285:1182–1186
44. Folkman J, Merler E, Abernathy C, Williams G 1971 Isolation of a tumor factor responsible for angiogenesis. *J Exp Med* 133:275–288
45. Folkman J, Klagsbrun M 1987 Angiogenic factors. *Science* 235:442–447
46. Gospodarowicz D, Ferrara N, Schweigerer L, Neufeld G 1987 Structural characterization and biological functions of fibroblast growth factor. *Endocr Rev* 8:95–114
47. Thomas KA, Rios-Candelore M, Gimenez-Gallego G, DiSalvo J, Bennett C, Rodkey J, Fitzpatrick S 1985 Pure brain-derived acidic fibroblast growth factor is a potent angiogenic vascular endothelial cell mitogen with sequence homology to interleukin 1. *Proc Natl Acad Sci USA* 82:6409–6413
48. Esch F, Baird A, Ling N, Ueno N, Hill F, Denoroy L, Klepper R, Gospodarowicz D, Bohlen P, Guillemin R 1985 Primary structure of bovine pituitary basic fibroblast growth factor (FGF) and comparison with the amino-terminal sequence of bovine brain acidic FGF. *Proc Natl Acad Sci USA* 82:6507–6511
49. Jaye M, Howk R, Burgess W, Ricca GA, Chiu IM, Ravera MW, O'Brien SJ, Modi WS, Maciag T, Drohan WN 1986 Human endothelial cell growth factor: cloning, nucleotide sequence, and chromosome localization. *Science* 233:541–545
50. Abraham JA, Mergia A, Whang JL, Tumolo A, Friedman J, Hjerrild KA, Gospodarowicz D, Fiddes JC 1986 Nucleotide sequence of a bovine clone encoding the angiogenic protein, basic fibroblast growth factor. *Science* 233:545–548
51. Gospodarowicz D, Thakral KK 1978 Production of a corpus luteum angiogenic factor responsible for proliferation of capillaries and neovascularization of the corpus luteum. *Proc Natl Acad Sci USA* 75:847–851
52. Vlodavsky I, Folkman J, Sullivan R, Fridman R, Ishai-Michaeli R, Sasse J, Klagsbrun M 1987 Endothelial cell-derived basic fibroblast growth factor: synthesis and deposition into subendothelial extracellular matrix. *Proc Natl Acad Sci USA* 84:2292–2296
53. Matsuzaki K, Yoshitake Y, Matuo Y, Sasaki H, Nishikawa K 1989 Monoclonal antibodies against heparin-binding growth factor II/basic fibroblast growth factor that block its biological activity: invalidity of the antibodies for tumor angiogenesis. *Proc Natl Acad Sci USA* 86:9911–9915
54. Dennis PA, Rifkin DB 1990 Studies on the role of basic fibroblast growth factor in vivo: inability of neutralizing antibodies to block tumor growth. *J Cell Physiol* 144:84–98
55. Miller DL, Ortega S, Bashayan O, Basch R, Basilico C 2000 Compensation by fibroblast growth factor 1 (FGF1) does not account for the mild phenotypic defects observed in FGF2 null mice. *Mol Cell Biol* 20:2260–2268
56. Dono R, Texido G, Dussel R, Ehmke H, Zeller R 1998 Impaired cerebral cortex development and blood pressure regulation in FGF-2-deficient mice. *EMBO J* 17:4213–4225
57. Zetter BR 1988 Angiogenesis. State of the art. *Chest* 93:159S–166S
58. Klagsbrun M, D'Amore PA 1991 Regulators of angiogenesis. *Annu Rev Physiol* 53:217–239
59. Senger DR, Galli SJ, Dvorak AM, Perruzzi CA, Harvey VS, Dvorak HF 1983 Tumor cells secrete a vascular permeability factor that promotes accumulation of ascites fluid. *Science* 219:983–985
60. Senger DR, Connolly DT, Van de Water L, Feder J, Dvorak HF 1990 Purification and NH<sub>2</sub>-terminal amino acid sequence of guinea pig tumor-secreted vascular permeability factor. *Cancer Res* 50:1774–1778
61. Ferrara N, Henzel WJ 1989 Pituitary follicular cells secrete a novel heparin-binding growth factor specific for vascular endothelial cells. *Biochem Biophys Res Commun* 161:851–858
62. Connolly DT, Olander JV, Heuvelman D, Nelson R, Monsell R, Siegel N, Haymore BL, Leimgruber R, Feder J 1989 Human vascular permeability factor. Isolation from U937 cells. *J Biol Chem* 264:20017–20024
63. Leung DW, Cachianes G, Kuang WJ, Goeddel DV, Ferrara N 1989 Vascular endothelial growth factor is a secreted angiogenic mitogen. *Science* 246:1306–1309
64. Keck PJ, Hauser SD, Krivi G, Sanzo K, Warren T, Feder J, Connolly DT 1989 Vascular permeability factor, an endothelial cell mitogen related to PDGF. *Science* 246:1309–1312
65. Ferrara N, Houck KA, Jakeman LB, Winer J, Leung DW 1991 The vascular endothelial growth factor family of polypeptides. *J Cell Biochem* 47:211–218
66. Pepper MS, Ferrara N, Orci L, Montesano R 1992 Potent synergism between vascular endothelial growth factor and basic fibroblast growth factor in the induction of angiogenesis in vitro. *Biochem Biophys Res Commun* 189:824–831
67. Pepper MS, Wasi S, Ferrara N, Orci L, Montesano R 1994 In vitro angiogenic and proteolytic properties of bovine lymphatic endothelial cells. *Exp Cell Res* 210:298–305
68. Nicosia R, Nicosia SV, Smith M 1994 Vascular endothelial growth factor, platelet-derived growth factor and indulin-like growth factor stimulate angiogenesis in vitro. *Am J Pathol* 145:1023–1029
69. Plouet J, Schilling J, Gospodarowicz D 1989 Isolation and characterization of a newly identified endothelial cell mitogen produced by AtT20 cells. *EMBO J* 8:3801–3808
70. Phillips GD, Stone AM, Jones BD, Schultz JC, Whitehead RA, Knighton DR 1994 Vascular endothelial growth factor (rh-VEGF165) stimulates direct angiogenesis in the rabbit cornea. *In Vivo* 8:961–965
71. Mesri EA, Federoff HJ, Brownlee M 1995 Expression of vascular endothelial growth factor from a defective herpes simplex virus type 1 amplicon vector induces angiogenesis in mice. *Circ Res* 76:161–167
72. Tolentino MJ, Miller JW, Gragoudas ES, Chatzistefanou K, Ferrara N, Adamis AP 1996 Vascular endothelial growth factor is sufficient to produce iris neovascularization and neovascular glaucoma in a nonhuman primate. *Arch Ophthalmol* 114:964–970
73. Nagy JA, Vasile E, Feng D, Sundberg C, Brown LF, Detmar MJ, Lawitts JA, Benjamin L, Tan X, Manseau EJ, Dvorak AM, Dvorak HF 2002 Vascular permeability factor/vascular endothelial growth factor induces lymphangiogenesis as well as angiogenesis. *J Exp Med* 196:1497–1506
74. Ergun S, Kilik N, Ziegeler G, Hansen A, Nollau P, Gotze J, Wurmback JH, Horst A, Weil J, Fernando M, Wagener C 2000 CEA-related cell adhesion molecule 1: a potent angiogenic factor and a major effector of vascular endothelial growth factor. *Mol Cell* 5:311–320
75. Alon T, Hemo I, Itin A, Pe'er J, Stone J, Keshet E 1995 Vascular endothelial growth factor acts as a survival factor for newly formed retinal vessels and has implications for retinopathy of prematurity. *Nat Med* 1:1024–1028
76. Gerber HP, Dixit V, Ferrara N 1998 Vascular endothelial growth factor induces expression of the antiapoptotic proteins Bcl-2 and A1 in vascular endothelial cells. *J Biol Chem* 273:13313–13316
77. Gerber HP, McMurtrey A, Kowalski J, Yan M, Keyt BA, Dixit V, Ferrara N 1998 VEGF regulates endothelial cell survival by the

- PI3-kinase/Akt signal transduction pathway. Requirement for Flk-1/KDR activation. *J Biol Chem* 273:30336–30343
78. Benjamin LE, Golijanin D, Itin A, Pode D, Keshet E 1999 Selective ablation of immature blood vessels in established human tumors follows vascular endothelial growth factor withdrawal. *J Clin Invest* 103:159–165
  79. Yuan F, Chen Y, Dellian M, Safabakhsh N, Ferrara N, Jain RK 1996 Time-dependent vascular regression and permeability changes in established human tumor xenografts induced by an anti-vascular endothelial growth factor/vascular permeability factor antibody. *Proc Natl Acad Sci USA* 93:14765–14770
  80. Fujio Y, Walsh K 1999 Akt mediates cytoprotection of endothelial cells by vascular endothelial growth factor in an anchorage-dependent manner. *J Biol Chem* 274:16349–16354
  81. Tran J, Rak J, Sheehan C, Saibil SD, LaCasse E, Korneluk RG, Kerbel RS 1999 Marked induction of the IAP family antiapoptotic proteins survivin and XIAP by VEGF in vascular endothelial cells. *Biochem Biophys Res Commun* 264:781–788
  82. Tran J, Master Z, Yu JL, Rak J, Dumont DJ, Kerbel RS 2002 A role for survivin in chemoresistance of endothelial cells mediated by VEGF. *Proc Natl Acad Sci USA* 99:4349–4354
  83. Gerber HP, Hillan KJ, Ryan AM, Kowalski J, Keller G-A, Rangel L, Wright BD, Radtke F, Aguet M, Ferrara N 1999 VEGF is required for growth and survival in neonatal mice. *Development* 126:1149–1159
  84. Guerrin M, Moukadir H, Chollet P, Moro F, Dutt K, Malecize F, Plouet J 1995 Vasculotropin/vascular endothelial growth factor is an autocrine growth factor for human retinal pigment epithelial cells cultured in vitro. *J Cell Physiol* 164:385–394
  85. Oberg-Welsh C, Sandler S, Andersson A, Welsh M 1997 Effects of vascular endothelial growth factor on pancreatic duct cell replication and the insulin production of fetal islet-like cell clusters in vitro. *Mol Cell Endocrinol* 126:125–132
  86. Sondell M, Lundborg G, Kanje M 1999 Vascular endothelial growth factor has neurotrophic activity and stimulates axonal outgrowth, enhancing cell survival and Schwann cell proliferation in the peripheral nervous system. *J Neurosci* 19:5731–5740
  87. Compennolle V, Brusselmans K, Acker T, Hoet P, Tjwa M, Beck H, Plaisance S, Dor Y, E. K., Lupu F, Nemery B, Dewerchin M, Van Veldhoven P, Plate K, Moons L, Collen D, Carmeliet P 2002 Loss of HIF-2 $\alpha$  and inhibition of VEGF impair fetal lung maturation, whereas treatment with VEGF prevents fatal respiratory distress in premature mice. *Nat Med* 8:702–710
  88. Lambrechts D, Storkebaum E, Morimoto M, Del-Favero J, Desmet F, Marklund SL, Wyns S, Thijs V, Andersson J, van Marion I, Al-Chalabi A, Bornes S, Musson R, Hansen V, Beckman L, Adolfsson R, Pall HS, Prats H, Vermeire S, Rutgeerts P, Katayama S, Awata T, Leigh N, Lang-Lazdunski L, Dewerchin M, Shaw C, Moons L, Vlietinck R, Morrison KE, Robberecht W, Van Broeckhoven C, Collen D, Andersen PM, Carmeliet P 2003 VEGF is a modifier of amyotrophic lateral sclerosis in mice and humans and protects motoneurons against ischemic death. *Nat Genet* 34:383–394
  89. Clauss M, Gerlach M, Gerlach H, Brett J, Wang F, Familletti PC, Pan YC, Olander JV, Connolly DT, Stern D 1990 Vascular permeability factor: a tumor-derived polypeptide that induces endothelial cell and monocyte procoagulant activity, and promotes monocyte migration. *J Exp Med* 172:1535–1545
  90. Broxmeyer HE, Cooper S, Li ZH, Lu L, Song HY, Kwon BS, Warren RE, Donner DB 1995 Myeloid progenitor cell regulatory effects of vascular endothelial cell growth factor. *Int J Hematol* 62:203–215
  91. Gabrilovich DI, Chen HL, Girgis KR, Cunningham HT, Meny GM, Nadaf S, Kavanaugh D, Carbone DP 1996 Production of vascular endothelial growth factor by human tumors inhibits the functional maturation of dendritic cells. *Nat Med* 2:1096–1103
  92. Gabrilovich D, Ishida T, Oyama T, Ran S, Kravtsov V, Nadaf S, Carbone DP 1998 Vascular endothelial growth factor inhibits the development of dendritic cells and dramatically affects the differentiation of multiple hematopoietic lineages in vivo. *Blood* 92:4150–4166
  93. Hattori K, Dias S, Heissig B, Hackett NR, Lyden D, Tateno M, Hicklin DJ, Zhu Z, Witte L, Crystal RG, Moore MA, Rafii S 2001 Vascular endothelial growth factor and angiopoietin-1 stimulate postnatal hematopoiesis by recruitment of vasculogenic and hematopoietic stem cells. *J Exp Med* 193:1005–1014
  94. Gerber H-P, Malik A, Solar GP, Sherman D, Liang X-H, Meng G, Hong K, Marsters J, Ferrara N 2002 Vascular endothelial growth factor regulates hematopoietic stem cell survival by an internal autocrine loop mechanism. *Nature* 417:954–958
  95. Cho NK, Keyes L, Johnson E, Heller J, Ryner L, Karim F, Krasnow MA 2002 Developmental control of blood cell migration by the *Drosophila* VEGF pathway. *Cell* 108:865–876
  96. Munier AI, Doucet D, Perrodou E, Zachary D, Meister M, Hoffmann JA, Janeway Jr CA, Lagueux M 2002 PVF2, a PDGF/VEGF-like growth factor, induces hemocyte proliferation in *Drosophila* larvae. *EMBO Rep* 3:1195–1200
  97. Evans CJ, Hartenstein V, Banerjee U 2003 Thicker than blood: conserved mechanisms in *Drosophila* and vertebrate hematopoiesis. *Dev Cell* 5:673–690
  98. Dvorak HF, Brown LF, Detmar M, Dvorak AM 1995 Vascular permeability factor/vascular endothelial growth factor, microvascular hyperpermeability, and angiogenesis. *Am J Pathol* 146:1029–1039
  99. Bates DO, Curry FE 1996 Vascular endothelial growth factor increases hydraulic conductivity of isolated perfused microvessels. *Am J Physiol* 271:H2520–H2528
  100. Bates DO, Curry FE 1997 Vascular endothelial growth factor increases microvascular permeability via a Ca(2+)-dependent pathway. *Am J Physiol* 273:H687–H694
  101. Roberts WG, Palade GE 1995 Increased microvascular permeability and endothelial fenestration induced by vascular endothelial growth factor. *J Cell Sci* 108:2369–2379
  102. Esser S, Wolburg K, Wolburg H, Breier G, Kurzchalia T, Risau W 1998 Vascular endothelial growth factor induces endothelial fenestrations in vitro. *J Cell Biol* 140:947–959
  103. Parenti A, Morbidelli L, Cui XL, Douglas JG, Hood JD, Granger HJ, Ledda F, Ziche M 1998 Nitric oxide is an upstream signal of vascular endothelial growth factor-induced extracellular signal-regulated kinase1/2 activation in postcapillary endothelium. *J Biol Chem* 273:4220–4226
  104. Ziche M, Morbidelli L, Choudhuri R, Zhang HT, Donnini S, Granger HJ, Bicknell R 1999 Nitric oxide synthase lies downstream from vascular endothelial growth factor-induced but not basic fibroblast growth factor-induced angiogenesis. *J Clin Invest* 99:2625–2634
  105. Morbidelli L, Chang CH, Douglas JG, Granger HJ, Ledda F, Ziche M 1996 Nitric oxide mediates mitogenic effect of VEGF on coronary venular endothelium. *Am J Physiol* 270:H411–H415
  106. Fukumura D, Gohongi T, Kadambi A, Izumi Y, Ang J, Yun CO, Buerk DG, Huang PL, Jain RK 2001 Predominant role of endothelial nitric oxide synthase in vascular endothelial growth factor-induced angiogenesis and vascular permeability. *Proc Natl Acad Sci USA* 98:2604–2609
  107. Dvorak HF, Harvey VS, Estrella P, Brown LF, McDonagh J, Dvorak AM 1987 Fibrin containing gels induce angiogenesis. Implications for tumor stroma generation and wound healing. *Lab Invest* 57:673–686
  108. Murata T, Ishibashi T, Inomata H 1992 Immunohistochemical detection of extravasated fibrinogen (fibrin) in human diabetic retina. *Graefes Arch Clin Exp Ophthalmol* 230:428–431
  109. Olk RJ, Lee CM 1993 Diabetic retinopathy: practical management. Philadelphia: Lippincott
  110. Ferrara N 1995 Vascular endothelial growth factor. The trigger for neovascularization in the eye. *Lab Invest* 72:615–618
  111. Eliceiri BP, Paul R, Schwartzberg PL, Hood JD, Leng J, Cheresh DA 1999 Selective requirement for Src kinases during VEGF-induced angiogenesis and vascular permeability. *Mol Cell* 4:915–924
  112. Gratton JP, Lin MI, Yu J, Weiss ED, Jiang ZL, Fairchild TA, Iwakiri Y, Groszmann R, Claffey KP, Cheng YC, Sessa WC 2003 Selective inhibition of tumor microvascular permeability by cavitrin blocks tumor progression in mice. *Cancer Cell* 4:31–39
  113. Aicher A, Heeschen C, Mildner-Rihm C, Urbich C, Ihling C, Technau-Ihling K, Zeiher AM, Dimmeler S 2003 Essential role of endothelial nitric oxide synthase for mobilization of stem and progenitor cells. *Nat Med* 9:1370–1376



114. Lee EW, Michalkiewicz M, Kitlinska J, Kalezić I, Switalska H, Yoo P, Sangkharat A, Ji H, Li L, Michalkiewicz T, Ljubisavljevic M, Johansson H, Grant DS, Zukowska Z 2003 Neuropeptide Y induces ischemic angiogenesis and restores function of ischemic skeletal muscles. *J Clin Invest* 111:1853–1862
115. Ku DD, Zaleski JK, Liu S, Brock TA 1993 Vascular endothelial growth factor induces EDRF-dependent relaxation in coronary arteries. *Am J Physiol* 265:H586–H592
116. Yang R, Thomas GR, Bunting S, Ko A, Ferrara N, Keyt B, Ross J, Jin H 1996 Effects of vascular endothelial growth factor on hemodynamics and cardiac performance. *J Cardiovasc Pharmacol* 27:838–844
117. Henry TD, Annex BH, McKendall GR, Azrin MA, Lopez JJ, Giordano FJ, Shah PK, Willerson JT, Benza RL, Berman DS, Gibson CM, Bajamonde A, Rundel AC, Fine J, McCluskey ER 2003 The VIVA trial: vascular endothelial growth factor in ischemia for vascular angiogenesis. *Circulation* 107:1359–1365
118. Houck KA, Ferrara N, Winer J, Cachianes G, Li B, Leung DW 1991 The vascular endothelial growth factor family: identification of a fourth molecular species and characterization of alternative splicing of RNA. *Mol Endocrinol* 5:1806–1814
119. Tischer E, Mitchell R, Hartman T, Silva M, Gospodarowicz D, Fiddes JC, Abraham JA 1991 The human gene for vascular endothelial growth factor. Multiple protein forms are encoded through alternative exon splicing. *J Biol Chem* 266:11947–11954
120. Vincenti V, Cassano C, Rocchi M, Persico G 1996 Assignment of the vascular endothelial growth factor gene to human chromosome 6p21.3. *Circulation* 93:1493–1495
121. Poltorak Z, Cohen T, Sivan R, Kandelis Y, Spira G, Vlodavsky I, Keshet E, Neufeld G 1997 VEGF145, a secreted vascular endothelial growth factor isoform that binds to extracellular matrix. *J Biol Chem* 272:7151–7158
122. Jingjing L, Xue Y, Agarwal N, Roque RS 1999 Human Muller cells express VEGF183, a novel spliced variant of vascular endothelial growth factor. *Invest Ophthalmol Vis Sci* 40:752–759
123. Lange T, Guttman-Raviv N, Baruch L, Machluf M, Neufeld G 2003 VEGF162, a new heparin-binding vascular endothelial growth factor splice form that is expressed in transformed human cells. *J Biol Chem* 278:17164–17169
124. Bates DO, Cui TG, Doughty JM, Winkler M, Sugiono M, Shields JD, Peat D, Gillatt D, Harper SJ 2002 VEGF(165)b, an inhibitory splice variant of vascular endothelial growth factor, is down-regulated in renal cell carcinoma. *Cancer Res* 62:4123–4131
125. Houck KA, Leung DW, Rowland AM, Winer J, Ferrara N 1992 Dual regulation of vascular endothelial growth factor bioavailability by genetic and proteolytic mechanisms. *J Biol Chem* 267:26031–26037
126. Muller YA, Li B, Christinger HW, Wells JA, Cunningham BC, de Vos AM 1997 Vascular endothelial growth factor: crystal structure and functional mapping of the kinase domain receptor binding site. *Proc Natl Acad Sci USA* 94:7192–7197
127. Park JE, Keller G-A, Ferrara N 1993 The vascular endothelial growth factor isoforms (VEGF): differential deposition into the subepithelial extracellular matrix and bioactivity of extracellular matrix-bound VEGF. *Mol Biol Cell* 4:1317–1326
128. Pepper MS 2001 Extracellular proteolysis and angiogenesis. *Thromb Haemostasis* 86:346–355
129. Plouet J, Moro F, Bertagnoli S, Coldeboeuf N, Mazarguil H, Clamens S, Bayard F 1997 Extracellular cleavage of the vascular endothelial growth factor 189-amino acid form by urokinase is required for its mitogenic effect. *J Biol Chem* 272:13390–13396
130. Keyt BA, Berleau LT, Nguyen HV, Chen H, Heinsohn H, Vandlen R, Ferrara N 1996 The carboxyl-terminal domain (111–165) of vascular endothelial growth factor is critical for its mitogenic potency. *J Biol Chem* 271:7788–7795
131. Grunstein J, Masbad JJ, Hickley R, Giordano F, Johnson RS 2000 Isoforms of vascular endothelial growth factor act in a coordinated fashion to recruit and expand tumor vasculature. *Mol Cell Biol* 20:7282–7291
132. Carmeliet P, Ng Y-S, Nuyens D, Theilmeier G, Brusselmans K, Cornelissen I, Ehler E, Kakkar VV, Stalmans I, Mattot V, Perriard J-C, Dewerchin M, Flameng W, Nagy A, Lupu F, Moons L, Collen D, D'Amore PA, Shima DT 1999 Impaired myocardial angiogenesis and ischemic cardiomyopathy in mice lacking the vascular endothelial growth factor isoforms VEGF164 and VEGF188. *Nat Med* 5:495–502
133. Ruhrberg C, Gerhardt H, Golding M, Watson R, Ioannidou S, Fujisawa H, Betsholtz C, Shima DT 2002 Spatially restricted patterning cues provided by heparin-binding VEGF-A control blood vessel branching morphogenesis. *Genes Dev* 16:2684–2698
134. Safran M, Kaelin Jr WJ 2003 HIF hydroxylation and the mammalian oxygen-sensing pathway. *J Clin Invest* 111:779–783
135. Dor Y, Porat R, Keshet E 2001 Vascular endothelial growth factor and vascular adjustments to perturbations in oxygen homeostasis. *Am J Physiol* 280:C1367–C1374
136. Semenza G 2003 Angiogenesis in ischemic and neoplastic disorders. *Annu Rev Med* 54:17–28
137. Goldberg MA, Schneider TJ 1994 Similarities between the oxygen-sensing mechanisms regulating the expression of vascular endothelial growth factor and erythropoietin. *J Biol Chem* 269:4355–4361
138. Levy AP, Levy NS, Wegner S, Goldberg MA 1995 Transcriptional regulation of the rat vascular endothelial growth factor gene by hypoxia. *J Biol Chem* 270:13333–13340
139. Liu Y, Cox SR, Morita T, Kourembanas S 1995 Hypoxia regulates vascular endothelial growth factor gene expression in endothelial cells. Identification of a 5' enhancer. *Circ Res* 77:638–643
140. Madan A, Curtin PT 1993 A 24-base-pair sequence 3' to the human erythropoietin gene contains a hypoxia-responsive transcriptional enhancer. *Proc Natl Acad Sci USA* 90:3928–3932
141. Wang GL, Semenza GL 1995 Purification and characterization of hypoxia-inducible factor 1. *J Biol Chem* 270:1230–1237
142. Semenza G 2002 Signal transduction to hypoxia-inducible factor 1. *Biochem Pharmacol* 64:993–998
143. Ema M, Taya S, Yokotani N, Sogawa K, Matsuda Y, Fujii-Kuriyama Y 1997 A novel bHLH-PAS factor with close sequence similarity to hypoxia-inducible factor 1 $\alpha$  regulates the VEGF expression and is potentially involved in lung and vascular development. *Proc Natl Acad Sci USA* 94:4273–4278
144. Mole DR, Maxwell PH, Pugh CW, Ratcliffe PJ 2001 Regulation of HIF by the von Hippel-Lindau tumour suppressor: implications for cellular oxygen sensing. *IUBMB Life* 52:43–47
145. Lonser RR, Glenn GM, Walther M, Chew EY, Libutti SK, Linehan WM, Oldfield EH 2003 von Hippel-Lindau disease. *Lancet* 361:2059–2067
146. Siemeister G, Weindel K, Mohrs K, Barleon B, Martiny-Baron G, Marme D 1996 Reversion of deregulated expression of vascular endothelial growth factor in human renal carcinoma cells by von Hippel-Lindau tumor suppressor protein. *Cancer Res* 56:2299–2301
147. Iliopoulos O, Levy AP, Jiang C, Kaelin Jr WG, Goldberg MA 1996 Negative regulation of hypoxia-inducible genes by the von Hippel-Lindau protein. *Proc Natl Acad Sci USA* 93:10595–10599
148. Ohh M, Yauc H, Lonergan KM, Whaley JM, Stemmer-Rachamimov AO, Louis DN, Gavin BJ, Kley N, Kaelin Jr WG, Iliopoulos O 1998 The von Hippel-Lindau tumor suppressor protein is required for proper assembly of an extracellular fibronectin matrix. *Mol Cell* 1:959–968
149. Lonergan KM, Iliopoulos O, Ohh M, Kamura T, Conaway RC, Conaway JW, Kaelin Jr WG 1998 Regulation of hypoxia-inducible mRNAs by the von Hippel-Lindau tumor suppressor protein requires binding to complexes containing elongins B/C and Cul2. *Mol Cell Biol* 18:732–741
150. Maxwell PH, Wiesener MS, Chang GW, Clifford SC, Vaux EC, Cockman ME, Wykoff CC, Pugh CW, Maher ER, Ratcliffe PJ 1999 The tumour suppressor protein VHL targets hypoxia-inducible factors for oxygen-dependent proteolysis. *Nature* 399:271–275
151. Jaakkola P, Mole DR, Tian YM, Wilson MI, Gielbert J, Gaskell SJ, Kriegsheim A, Hebestreit HF, Mukherji M, Schofield CJ, Maxwell PH, Pugh CW, Ratcliffe PJ 2001 Targeting of HIF- $\alpha$  to the von Hippel-Lindau ubiquitylation complex by O<sub>2</sub>-regulated prolyl hydroxylation. *Science* 292:468–472
152. Ivan M, Kondo K, Yang H, Kim W, Valiano J, Ohh M, Salic A, Asara JM, Lane WS, Kaelin Jr WG 2001 HIF- $\alpha$  targeted for VHL-mediated destruction by proline hydroxylation: implications for O<sub>2</sub> sensing. *Science* 292:464–468



153. Maxwell PH, Ratcliffe PJ 2002 Oxygen sensors and angiogenesis. *Semin Cell Dev Biol* 13:29–37
154. Pugh CW, Ratcliffe PJ 2003 Regulation of angiogenesis by hypoxia: role of the HIF system. *Nat Med* 9:677–684
155. Zundel W, Schindler C, Haas-Kogan D, Koong A, Kaper F, Chen E, Gottschalk AR, Ryan HE, Johnson RS, Jefferson AB, Stokoe D, Giaccia AJ 2000 Loss of PTEN facilitates HIF-1-mediated gene expression. *Genes Dev* 14:391–396
156. Li J, Yen C, Liaw D, Podsypanina K, Bose S, Wang SI, Puc J, Miliareis C, Rodgers L, McCombie R, Bigner SH, Giovannella BC, Iltmann M, Tycko B, Hibshoosh H, Wigler MH, Parsons R 1997 PTEN, a putative protein tyrosine phosphatase gene mutated in human brain, breast, and prostate cancer. *Science* 275:1943–1947
157. Marsh DJ, Dahia PL, Zheng Z, Liaw D, Parsons R, Gorlin RJ, Eng C 1997 Germline mutations in PTEN are present in Bannayan-Zonana syndrome. *Nat Genet* 16:333–334
158. Tang TT, Lasky LA 2003 The forkhead transcription factor FOXO4 induces the down-regulation of hypoxia-inducible factor 1  $\alpha$  by a von Hippel-Lindau protein-independent mechanism. *J Biol Chem* 278:30125–30135
159. Frank S, Hubner G, Breier G, Longaker MT, Greenhalgh DG, Werner S 1995 Regulation of VEGF expression in cultured keratinocytes. Implications for normal and impaired wound healing. *J Biol Chem* 270:12607–12613
160. Pertovaara L, Kaipainen A, Mustonen T, Orpana A, Ferrara N, Saksela O, Alitalo K 1994 Vascular endothelial growth factor is induced in response to transforming growth factor- $\beta$  in fibroblastic and epithelial cells. *J Biol Chem* 269:6271–6274
161. Warren RS, Yuan H, Matli MR, Ferrara N, Donner DB 1996 Induction of vascular endothelial growth factor by insulin-like growth factor 1 in colorectal carcinoma. *J Biol Chem* 271:29483–29488
162. Ben-Av P, Crofford LJ, Wilder RL, Hla T 1995 Induction of vascular endothelial growth factor expression in synovial fibroblasts. *FEBS Lett* 372:83–87
163. Cohen T, Nahari D, Cerem LW, Neufeld G, Levi BZ 1996 Interleukin 6 induces the expression of vascular endothelial growth factor. *J Biol Chem* 271:736–741
164. Soh EY, Sobhi SA, Wong MG, Meng YG, Siperstein AE, Clark OH, Duh QY 1996 Thyroid-stimulating hormone promotes the secretion of vascular endothelial growth factor in thyroid cancer cell lines. *Surgery* 120:944–947
165. Shifren JL, Mesiano S, Taylor RN, Ferrara N, Jaffe RB 1998 Corticotropin regulates vascular endothelial growth factor expression in human fetal adrenal cortical cells. *J Clin Endocrinol Metab* 83:1342–1347
166. Shweiki D, Itin A, Neufeld G, Gitay-Goren H, Keshet E 1993 Patterns of expression of vascular endothelial growth factor (VEGF) and VEGF receptors in mice suggest a role in hormonally-mediated angiogenesis. *J Clin Invest* 91:2235–2243
167. Ferrara N, Chen H, Davis-Smyth T, Gerber H-P, Nguyen T-N, Peers D, Chisholm V, Hillan KJ, Schwall RH 1998 Vascular endothelial growth factor is essential for corpus luteum angiogenesis. *Nat Med* 4:336–340
168. Christenson LK, Stouffer RL 1997 Follicle-stimulating hormone and luteinizing hormone/chorionic gonadotropin stimulation of vascular endothelial growth factor production by macaque granulosa cells from pre- and periovulatory follicles. *J Clin Endocrinol Metab* 82:2135–2142
169. Schwarzenbach H, Chakrabarti G, Paust HJ, Mukhopadhyay AK 2004 Gonadotropin-mediated regulation of the murine VEGF expression in MA-10 Leydig cells. *J Androl* 25:128–139
170. Stewart RJ, Panigrahy D, Flynn E, Folkman J 2001 Vascular endothelial growth factor expression and tumor angiogenesis are regulated by androgens in hormone responsive human prostate carcinoma: evidence for androgen dependent destabilization of vascular endothelial growth factor transcripts. *J Urol* 165:688–693
171. Mueller MD, Vigne JL, Minchenko A, Lebovic DI, Leitman DC, Taylor RN 2000 Regulation of vascular endothelial growth factor (VEGF) gene transcription by estrogen receptors  $\alpha$  and  $\beta$ . *Proc Natl Acad Sci USA* 97:10972–10977
172. Mueller MD, Vigne JL, Pritts EA, Chao V, Dreher E, Taylor RN 2003 Progestins activate vascular endothelial growth factor gene transcription in endometrial adenocarcinoma cells. *Fertil Steril* 79:386–392
173. Grugel S, Finkenzeller G, Weindel K, Barleon B, Marme D 1995 Both v-Ha-Ras and v-Raf stimulate expression of the vascular endothelial growth factor in NIH 3T3 cells. *J Biol Chem* 270:25915–25919
174. Okada F, Rak JW, Croix BS, Lieubeau B, Kaya M, Roncari L, Shirasawa S, Sasazuki T, Kerbel RS 1998 Impact of oncogenes in tumor angiogenesis: mutant K-ras up-regulation of vascular endothelial growth factor/vascular permeability factor is necessary, but not sufficient for tumorigenicity of human colorectal carcinoma cells. *Proc Natl Acad Sci USA* 95:3609–3614
175. Shi Y-P, Ferrara N 1999 Oncogenic ras fails to restore an in vivo oncogenic phenotype in embryonic stem cells lacking VEGF. *Biochem Biophys Res Commun* 254:480–483
176. Zhang X, Gaspard JP, Chung DC 2001 Regulation of vascular endothelial growth factor by the Wnt and K-ras pathways in colonic neoplasia. *Cancer Res* 61:6050–6054
177. Seno H, Oshima M, Ishikawa TO, Oshima H, Takaku K, Chiba T, Narumiya S, Taketo MM 2002 Cyclooxygenase 2- and prostaglandin E(2) receptor EP(2)-dependent angiogenesis in Apc( $\delta$ 716) mouse intestinal polyps. *Cancer Res* 62:506–511
178. Williams CS, Tsujii M, Reese J, Dey SK, DuBois RN 2000 Host cyclooxygenase-2 modulates carcinoma growth. *J Clin Invest* 105:1589–1594
179. Sonoshita M, Takaku K, Sasaki N, Sugimoto Y, Ushikubi F, Narumiya S, Oshima M, Taketo MM 2001 Acceleration of intestinal polyposis through prostaglandin receptor EP2 in Apc( $\delta$  716) knockout mice. *Nat Med* 7:1048–1051
180. Amano H, Hayashi I, Endo H, Kitasato H, Yamashina S, Maruyama T, Kobayashi M, Satoh K, Narita M, Sugimoto Y, Murata T, Yoshimura H, Narumiya S, Majima M 2003 Host prostaglandin E(2)-EP3 signaling regulates tumor-associated angiogenesis and tumor growth. *J Exp Med* 197:221–232
181. Plouet J, Moukadir HJ 1990 Characterization of the receptors for vasculotropin on bovine adrenal cortex-derived capillary endothelial cells. *J Biol Chem* 265:22071–22075
182. Vaisman N, Gospodarowicz D, Neufeld G 1990 Characterization of the receptors for vascular endothelial growth factor. *J Biol Chem* 265:19461–19466
183. Jakeman LB, Winer J, Bennett GL, Altar CA, Ferrara N 1992 Binding sites for vascular endothelial growth factor are localized on endothelial cells in adult rat tissues. *J Clin Invest* 89:244–253
184. Jakeman LB, Armanini M, Phillips HS, Ferrara N 1993 Developmental expression of binding sites and mRNA for vascular endothelial growth factor suggests a role for this protein in vasculogenesis and angiogenesis. *Endocrinology* 133:848–859
185. Shen H, Clauss M, Ryan J, Schmidt AM, Tijburg P, Borden L, Connolly D, Stern D, Kao J 1993 Characterization of vascular permeability factor/vascular endothelial growth factor receptors on mononuclear phagocytes. *Blood* 81:2767–2773
186. Shibuya M, Yamaguchi S, Yamane A, Ikeda T, Tojo A, Matsushima H, Sato M 1990 Nucleotide sequence and expression of a novel human receptor-type tyrosine kinase (flt) closely related to the fms family. *Oncogene* 8:519–527
187. Matthews W, Jordan CT, Gavin M, Jenkins NA, Copeland NG, Lemischka IR 1991 A receptor tyrosine kinase cDNA isolated from a population of enriched primitive hematopoietic cells and exhibiting close genetic linkage to c-kit. *Proc Natl Acad Sci USA* 88:9026–9030
188. Terman BI, Carrion ME, Kovacs E, Rasmussen BA, Eddy RL, Shows TB 1991 Identification of a new endothelial cell growth factor receptor tyrosine kinase. *Oncogene* 6:1677–1683
189. Pajusola K, Aprelikova O, Korhonen J, Kaipainen A, Pertovaara L, Alitalo R, Alitalo K 1992 FLT4 receptor tyrosine kinase contains seven immunoglobulin-like loops and is expressed in multiple human tissues and cell lines. *Cancer Res* 52:5738–5743
190. de Vries C, Escobedo JA, Ueno H, Houck K, Ferrara N, Williams LT 1992 The fms-like tyrosine kinase, a receptor for vascular endothelial growth factor. *Science* 255:989–991
191. Gerber HP, Condorelli F, Park J, Ferrara N 1997 Differential transcriptional regulation of the two VEGF receptor genes. Flt-1, but not

- Flk-1/KDR, is up-regulated by hypoxia. *J Biol Chem* 272:23659–23667
192. **Park JE, Chen HH, Winer J, Houck KA, Ferrara N** 1994 Placenta growth factor. Potentiation of vascular endothelial growth factor bioactivity, in vitro and in vivo, and high affinity binding to Flt-1 but not to Flk-1/KDR. *J Biol Chem* 269:25646–25654
193. **Olofsson B, Korpelainen E, Pepper MS, Mandriota SJ, Aase K, Kumar V, Gunji Y, Jeltsch MM, Shibuya M, Alitalo K, Eriksson U** 1998 Vascular endothelial growth factor B (VEGF-B) binds to VEGF receptor-1 and regulates plasminogen activator activity in endothelial cells. *Proc Natl Acad Sci USA* 95:11709–11714
194. **Kendall RL, Thomas KA** 1993 Inhibition of vascular endothelial cell growth factor activity by an endogenously encoded soluble receptor. *Proc Natl Acad Sci USA* 90:10705–10709
195. **Davis-Smyth T, Chen H, Park J, Presta LG, Ferrara N** 1996 The second immunoglobulin-like domain of the VEGF tyrosine kinase receptor Flt-1 determines ligand binding and may initiate a signal transduction cascade. *EMBO J* 15:4919–4927
196. **Barleon B, Totzke F, Herzog C, Blanke S, Kremmer E, Siemeister G, Marme D, Martiny-Baron G** 1997 Mapping of the sites for ligand binding and receptor dimerization at the extracellular domain of the vascular endothelial growth factor receptor FLT-1. *J Biol Chem* 272:10382–10388
197. **Davis-Smyth T, Presta LG, Ferrara N** 1998 Mapping the charged residues in the second immunoglobulin-like domain of the vascular endothelial growth factor/placenta growth factor receptor Flt-1 required for binding and structural stability. *J Biol Chem* 273:3216–3222
198. **Wiesmann C, Fuh G, Christinger HW, Eigenbrot C, Wells JA, de Vos AM** 1997 Crystal structure at 1.7 Å resolution of VEGF in complex with domain 2 of the Flt-1 receptor. *Cell* 91:695–704
199. **Waltenberger J, Claesson-Welsh L, Siegbahn A, Shibuya M, Heldin CH** 1994 Different signal transduction properties of KDR and Flt1, two receptors for vascular endothelial growth factor. *J Biol Chem* 269:26988–26995
200. **Carmeliet P, Moons L, Luttun A, Vincenti V, Compernelle V, De Mol M, Wu Y, Bono F, Devy L, Beck H, Scholz D, Acker T, DiPalma T, Dewerchin M, Noel A, Stalmans I, Barra A, Blacher S, Vandendriessche T, Ponten A, Eriksson U, Plate KH, Foidart JM, Schaper W, Charnock-Jones DS, Hicklin DJ, Herbert JM, Collen D, Persico MG** 2001 Synergism between vascular endothelial growth factor and placental growth factor contributes to angiogenesis and plasma extravasation in pathological conditions. *Nat Med* 7:575–583
201. **Gille H, Kowalski J, Yu L, Chen H, Pisabarro MT, Davis-Smyth T, Ferrara N** 2000 A repressor sequence in the juxtamembrane domain of Flt-1 (VEGFR-1) constitutively inhibits VEGF-dependent PI 3 kinase activation and endothelial cell migration. *EMBO J* 19:4064–4073
202. **Zeng H, Dvorak HF, Mukhopadhyay D** 2001 Vascular permeability factor (VPF)/vascular endothelial growth factor (VEGF) peceptor-1 down-modulates VPF/VEGF receptor-2-mediated endothelial cell proliferation, but not migration, through phosphatidylinositol 3-kinase-dependent pathways. *J Biol Chem* 276:26969–26979
203. **Landgren E, Schiller P, Cao Y, Claesson-Welsh L** 1998 Placenta growth factor stimulates MAP kinase and mitogenicity but not phospholipase C- $\gamma$  and migration of endothelial cells expressing Flt 1. *Oncogene* 16:359–367
204. **Maru Y, Yamaguchi S, Shibuya M** 1998 Flt-1, a receptor for vascular endothelial growth factor, has transforming and morphogenic potentials. *Oncogene* 16:2585–2595
205. **Autiero M, Waltenberger J, Communi D, Kranz A, Moons L, Lambrechts D, Kroll J, Plaisance S, De Mol M, Bono F, Kliche S, Fellbrich G, Ballmer-Hofer K, Maglione D, Mayr-Beyrle U, Dewerchin M, Dombrowski S, Stanimirovic D, Van Hummelen P, Dehio C, Hicklin DJ, Persico G, Herbert JM, Shibuya M, Collen D, Conway EM, Carmeliet P** 2003 Role of PlGF in the intra- and intermolecular cross talk between the VEGF receptors Flt1 and Flk1. *Nat Med* 9:936–943
206. **Christinger HW, Fuh G, de Vos AM, Wiesmann C** 2004 The crystal structure of PlGF in complex with domain 2 of VEGFR-1. *J Biol Chem* 279:10382–10388
207. **Fong GH, Rossant J, Gertsenstein M, Breitman ML** 1995 Role of the Flt-1 receptor tyrosine kinase in regulating the assembly of vascular endothelium. *Nature* 376:66–70
208. **Fong GH, Zhang L, Bryce DM, Peng J** 1999 Increased hemangioblast commitment, not vascular disorganization, is the primary defect in flt-1 knock-out mice. *Development* 126:3015–3025
209. **Hiratsuka S, Minowa O, Kuno J, Noda T, Shibuya M** 1998 Flt-1 lacking the tyrosine kinase domain is sufficient for normal development and angiogenesis in mice. *Proc Natl Acad Sci USA* 95:9349–9354
210. **Barleon B, Sozzani S, Zhou D, Weich HA, Mantovani A, Marme D** 1996 Migration of human monocytes in response to vascular endothelial growth factor (VEGF) is mediated via the VEGF receptor flt-1. *Blood* 87:3336–3343
211. **Selvaraj SK, Giri RK, Perelman N, Johnson C, Malik P, Kalra VK** 2003 Mechanism of monocyte activation and expression of proinflammatory cytochemokines by placenta growth factor. *Blood* 102:1515–1524
212. **Hiratsuka S, Maru Y, Okada A, Seiki M, Noda T, Shibuya M** 2001 Involvement of Flt-1 tyrosine kinase (vascular endothelial growth factor receptor-1) in pathological angiogenesis. *Cancer Res* 61:1207–1213
213. **Hiratsuka S, Nakamura K, Iwai S, Murakami M, Itoh T, Kijima H, Shipley JM, Senior RM, Shibuya M** 2002 MMP9 induction by vascular endothelial growth factor receptor-1 is involved in lung-specific metastasis. *Cancer Cell* 2:289–300
214. **Hattori K, Heissig B, Wu Y, Dias S, Tejada R, Ferris B, Hicklin DJ, Zhu Z, Bohlen P, Witte L, Hendriks J, Hackett NR, Crystal RG, Moore MA, Werb Z, Lyden D, Rafii S** 2002 Placental growth factor reconstitutes hematopoiesis by recruiting VEGFR1(+) stem cells from bone-marrow microenvironment. *Nat Med* 8:841–849
215. **Luttun A, Tjwa M, Moons L, Wu Y, Angelillo-Scherrer A, Liao F, Nagy JA, Hooper A, Priller J, De Klerck B, Compernelle V, Daci E, Bohlen P, Dewerchin M, Herbert JM, Fava R, Matthys P, Carmeliet G, Collen D, Dvorak HF, Hicklin DJ, Carmeliet P** 2002 Revascularization of ischemic tissues by PlGF treatment, and inhibition of tumor angiogenesis, arthritis and atherosclerosis by anti-Flt1. *Nat Med* 8:831–840
216. **Pipp F, Heil M, Issbrucker K, Ziegelhoeffer T, Martin S, van den Heuvel J, Weich H, Fernandez B, Golomb G, Carmeliet P, Schaper W, Clauss M** 2003 VEGFR-1-selective VEGF homologue PlGF is arteriogenic: evidence for a monocyte-mediated mechanism. *Circ Res* 92:378–385
217. **LeCouter J, Moritz DR, Li B, Phillips GL, Liang XH, Gerber HP, Hillan KJ, Ferrara N** 2003 Angiogenesis-independent endothelial protection of liver: role of VEGFR-1. *Science* 299:890–893
218. **Matsumoto K, Yoshitomi H, Rossant J, Zaret KS** 2001 Liver organogenesis promoted by endothelial cells prior to vascular function. *Science* 294:559–563
219. **Lammert E, Cleaver O, Melton D** 2001 Induction of pancreatic differentiation by signals from blood vessels. *Science* 294:564–567
220. **Terman BI, Dougher Vermazen M, Carrion ME, Dimitrov D, Armellino DC, Gospodarowicz D, Bohlen P** 1992 Identification of the KDR tyrosine kinase as a receptor for vascular endothelial cell growth factor. *Biochem Biophys Res Commun* 187:1579–1586
221. **Quinn TP, Peters KG, De Vries C, Ferrara N, Williams LT** 1993 Fetal liver kinase 1 is a receptor for vascular endothelial growth factor and is selectively expressed in vascular endothelium. *Proc Natl Acad Sci USA* 90:7533–7537
222. **Millauer B, Witzigmann Voos S, Schnurch H, Martinez R, Moller NP, Risau W, Ullrich A** 1993 High affinity VEGF binding and developmental expression suggest Flk-1 as a major regulator of vasculogenesis and angiogenesis. *Cell* 72:835–846
223. **Shalaby F, Rossant J, Yamaguchi TP, Gertsenstein M, Wu XF, Breitman ML, Schuh AC** 1995 Failure of blood-island formation and vasculogenesis in Flk-1-deficient mice. *Nature* 376:62–66
224. **Kabrun N, Buhning HJ, Choi K, Ullrich A, Risau W, Keller G** 1997 Flk-1 expression defines a population of early embryonic hematopoietic precursors. *Development* 124:2039–2048
225. **Fuh G, Li B, Crowley C, Cunningham B, Wells JA** 1998 Requirements for binding and signaling of the kinase domain receptor for vascular endothelial growth factor. *J Biol Chem* 273:11197–11204



226. Matsumoto T, Claesson-Welsh L 2001 VEGF receptor signal transduction. *Sci STKE* 112 RE 21:1–17
227. Takahashi T, Yamaguchi S, Chida K, Shibuya M 2001 A single autophosphorylation site on KDR/Flk-1 is essential for VEGF-A-dependent activation of PLC- $\gamma$  and DNA synthesis in vascular endothelial cells. *EMBO J* 20:2768–2778
228. Guo D, Jia Q, Song HY, Warren RS, Donner DB 1995 Vascular endothelial cell growth factor promotes tyrosine phosphorylation of mediators of signal transduction that contain SH2 domains. Association with endothelial cell proliferation. *J Biol Chem* 270: 6729–6733
229. Byzova TV, Goldman CK, Pampori N, Thomas KA, Bett A, Shattil SJ, Plow EF 2000 A mechanism for modulation of cellular responses to VEGF: activation of the integrins. *Mol Cell* 6:851–860
230. Takahashi T, Ueno H, Shibuya M 1999 VEGF activates protein kinase C-dependent, but Ras-independent Raf-MEK-MAP kinase pathway for DNA synthesis in primary endothelial cells. *Oncogene* 18:2221–2230
231. Wu LW, Mayo LD, Dunbar JD, Kessler KM, Baerwald MR, Jaffe EA, Wang D, Warren RS, Donner DB 2000 Utilization of distinct signaling pathways by receptors for vascular endothelial cell growth factor and other mitogens in the induction of endothelial cell proliferation. *J Biol Chem* 275:5096–5103
232. Gille H, Kowalski J, Li B, LeCouter J, Moffat B, Zioncheck T, Pelletier N, Ferrara N 2001 Analysis of biological effects and signaling properties of Flt-1 (VEGFR-1) and KDR (VEGFR-2). A reassessment using novel receptor-specific VEGF mutants. *J Biol Chem* 276:3222–3230
233. Yamazaki Y, Takani K, Atoda H, Morita T 2003 Snake venom VEGFs exhibit potent activity through their specific recognition of KDR (VEGF receptor 2). *J Biol Chem* 278:51985–51988
234. Morales-Ruiz M, Fulton D, Sowa G, Languino LR, Fujio Y, Walsh K, Sessa WC 2000 Vascular endothelial growth factor-stimulated actin reorganization and migration of endothelial cells is regulated via the serine/threonine kinase Akt. *Circ Res* 86:892–896
235. Adini A, Kornaga T, Firoozbakht F, Benjamin LE 2002 Placental growth factor is a survival factor for tumor endothelial cells and macrophages. *Cancer Res* 62:2749–2752
236. Soker S, Fidler IJ, Neufeld G, Klagsbrun M 1996 Characterization of novel vascular endothelial growth factor (VEGF) receptors on tumor cells that bind VEGF<sub>165</sub> via its exon 7-encoded domain. *J Biol Chem* 271:5761–5767
237. Soker S, Takashima S, Miao HQ, Neufeld G, Klagsbrun M 1998 Neuropilin-1 is expressed by endothelial and tumor cells as an isoform-specific receptor for vascular endothelial growth factor. *Cell* 92:735–745
238. Neufeld G, Cohen T, Shraga N, Lange T, Kessler O, Herzog Y 2002 The neuropilins: multifunctional semaphorin and VEGF receptors that modulate axon guidance and angiogenesis. *Trends Cardiovasc Med* 12:13–19
239. Fuh G, Garcia KC, de Vos AM 2000 The interaction of neuropilin-1 with vascular endothelial growth factor and its receptor flt-1. *J Biol Chem* 275:26690–26695
240. Miao HQ, Soker S, Feiner L, Alonso JL, Raper JA, Klagsbrun M 1999 Neuropilin-1 mediates collapsin-1/semaphorin III inhibition of endothelial cell motility: functional competition of collapsin-1 and vascular endothelial growth factor-165. *J Cell Biol* 146:233–242
241. Tamagnone L, Artigiani S, Chen H, He Z, Ming GI, Song H, Chedotal A, Winberg ML, Goodman CS, Poo M, Tessier-Lavigne M, Comoglio PM 1999 Plexins are a large family of receptors for transmembrane, secreted, and GPI-anchored semaphorins in vertebrates. *Cell* 99:71–80
242. Bagri A, Tessier-Lavigne M 2002 Neuropilins as Semaphorin receptors: in vivo functions in neuronal cell migration and axon guidance. *Adv Exp Med Biol* 515:13–31
243. Kawasaki T, Kitsukawa T, Bekku Y, Matsuda Y, Sanbo M, Yagi T, Fujisawa H 1999 A requirement for neuropilin-1 in embryonic vessel formation. *Development* 126:4895–4902
244. Lee P, Goishi K, Davidson AJ, Mannix R, Zon L, Klagsbrun M 2002 Neuropilin-1 is required for vascular development and is a mediator of VEGF-dependent angiogenesis in zebrafish. *Proc Natl Acad Sci USA* 99:10470–10475
245. Yuan L, Moyon D, Pardanaud L, Breant C, Karkkainen MJ, Alitalo K, Eichmann A 2002 Abnormal lymphatic vessel development in neuropilin 2 mutant mice. *Development* 129:4797–4806
246. Carmeliet P, Ferreira V, Breier G, Pollefeyt S, Kieckens L, Gertsenstein M, Fahrig M, Vandenhoek A, Harpal K, Eberhardt C, Declercq C, Pawling J, Moons L, Collen D, Risau W, Nagy A 1996 Abnormal blood vessel development and lethality in embryos lacking a single VEGF allele. *Nature* 380:435–439
247. Ferrara N, Carver Moore K, Chen H, Dowd M, Lu L, O'Shea KS, Powell Braxton L, Hillan KJ, Moore MW 1996 Heterozygous embryonic lethality induced by targeted inactivation of the VEGF gene. *Nature* 380:439–442
248. Haigh JJ, Morelli PI, Gerhardt H, Haigh K, Tsien J, Damert A, Miquerol L, Muhlner U, Klein R, Ferrara N, Wagner EF, Betsholtz C, Nagy A 2003 Cortical and retinal defects caused by dosage-dependent reductions in VEGF-A paracrine signaling. *Dev Biol* 262:225–241
249. Raab S, Beck H, Gaumann A, Yuce A, Gerber HP, Plate K, Hammes HP, Ferrara N, Breier G 2004 Impaired brain angiogenesis and neuronal apoptosis induced by conditional homozygous inactivation of vascular endothelial growth factor. *Thromb Haemostasis* 91:595–605
250. Miquerol L, Langille BL, Nagy A 2000 Embryonic development is disrupted by modest increases in vascular endothelial growth factor gene expression. *Development* 127:3941–3946
251. Bellomo D, Headrick JP, Silins GU, Paterson CA, Thomas PS, Gartside M, Mould A, Cahill MM, Tonks ID, Grimmond SM, Townsend S, Wells C, Little M, Cummings MC, Hayward NK, Kay GF 2000 Mice lacking the vascular endothelial growth factor-B gene (Vegfb) have smaller hearts, dysfunctional coronary vasculature, and impaired recovery from cardiac ischemia. *Circ Res* 86:E29–E35
252. Karkkainen MJ, Haiko P, Sainio K, Partanen J, Taipale J, Petrova TV, Jeltsch M, Jackson DG, Talikka M, Rauvala H, Betsholtz C, Alitalo K 2004 Vascular endothelial growth factor C is required for sprouting of the first lymphatic vessels from embryonic veins. *Nat Immunol* 5:74–80
253. Kitamoto Y, Tokunaga H, Tomita K 1997 Vascular endothelial growth factor is an essential molecule for mouse kidney development: glomerulogenesis and nephrogenesis. *J Clin Invest* 99:2351–2357
254. Eremina V, Sood M, Haigh J, Nagy A, Lajoie G, Ferrara N, Gerber HP, Kikkawa Y, Miner JH, Quaggin SE 2003 Glomerular-specific alterations of VEGF-A expression lead to distinct congenital and acquired renal diseases. *J Clin Invest* 111:707–716
255. Ostendorf T, Kunter U, Eitner F, Loos A, Regele H, Kerjaschki D, Henninger DD, Janjic N, Floege J 1999 VEGF(165) mediates glomerular endothelial repair. *J Clin Invest* 104:913–923
256. Sugimoto H, Hamano Y, Charytan D, Cosgrove D, Kieran M, Sudhakar A, Kalluri R 2003 Neutralization of circulating vascular endothelial growth factor (VEGF) by anti-VEGF antibodies and soluble VEGF receptor 1 (sFlt-1) induces proteinuria. *J Biol Chem* 278:12605–12608
257. Ryan AM, Eppler DB, Hagler KE, Bruner RH, Thomford PJ, Hall RL, Shopp GM, O'Neill CA 1999 Preclinical safety evaluation of rhuMabVEGF, an antiangiogenic humanized monoclonal antibody. *Toxicol Pathol* 27:78–86
258. Kabbinnar F, Hurwitz HI, Fehrenbacher L, Meropol NJ, Novotny WF, Lieberman G, Griffing S, Bergsland E 2003 Phase II, randomized trial comparing bevacizumab plus fluorouracil (FU)/leucovorin (LV) with FU/LV alone in patients with metastatic colorectal cancer. *J Clin Oncol* 21:60–65
259. Poole AR 1991 The growth plate: cellular physiology, cartilage assembly and mineralization. In: Hall BK, Newman SA, eds. *Cartilage: molecular aspects*. Boca Raton, FL: CRC Press; 179–211
260. Gerber HP, Vu TH, Ryan AM, Kowalski J, Werb Z, Ferrara N 1999 VEGF couples hypertrophic cartilage remodeling, ossification and angiogenesis during endochondral bone formation. *Nat Med* 5:623–628
261. Carlevaro MF, Cermelli S, Cancedda R, Descalzi Cancedda F 2000 Vascular endothelial growth factor (VEGF) in cartilage neovascularization and chondrocyte differentiation: auto-paracrine role during endochondral bone formation. *J Cell Sci* 113:59–69
262. Deckers MM, van Bezooijen RL, van Der Horst G, Hoogendam J, van Der Bent C, Papapoulos SE, Lowik CW 2002 Bone mor-



- phogenetic proteins stimulate angiogenesis through osteoblast-derived vascular endothelial growth factor A. *Endocrinology* 143:1545–1553
263. Bouletreau PJ, Warren SM, Spector JA, Peled ZM, Gerrets RP, Greenwald JA, Longaker MT 2002 Hypoxia and VEGF up-regulate BMP-2 mRNA and protein expression in microvascular endothelial cells: implications for fracture healing. *Plast Reconstr Surg* 109:2384–2397
  264. Vu TH, Shipley JM, Bergers G, Berger JE, Helms JA, Hanahan D, Shapiro SD, Senior RM, Werb Z 1998 MMP-9/gelatinase B is a key regulator of growth plate angiogenesis and apoptosis of hypertrophic chondrocytes. *Cell* 93:411–422
  265. Bergers G, Brekken R, McMahon G, Vu TH, Itoh T, Tamaki K, Tanzawa K, Thorpe P, Itohara S, Werb Z, Hanahan D 2000 Matrix metalloproteinase-9 triggers the angiogenic switch during carcinogenesis. *Nat Cell Biol* 2:737–744
  266. Street J, Bao M, DeGuzman L, Bunting S, Peale Jr FV, Ferrara N, Steinmetz H, Hoeffel J, Cleland JL, Daugherty A, Van Bruggen N, Redmond HP, Carano RA, Filvaroff EH 2002 Vascular endothelial growth factor stimulates bone repair by promoting angiogenesis and bone turnover. *Proc Natl Acad Sci USA* 99:9656–9661
  267. Colnot C, Thompson Z, Miclau T, Werb Z, Helms JA 2003 Altered fracture repair in the absence of MMP9. *Development* 130:4123–4133
  268. Mayr-Wohlfart U, Waltenberger J, Hausser H, Kessler S, Gunther KP, Dehio C, Puhl W, Brenner RE 2002 Vascular endothelial growth factor stimulates chemotactic migration of primary human osteoblasts. *Bone* 30:472–477
  269. Engsig MT, Chen QJ, Vu TH, Pedersen AC, Therkidsen B, Lund LR, Henriksen K, Lenhard T, Foged NT, Werb Z, Delaisse JM 2000 Matrix metalloproteinase 9 and vascular endothelial growth factor are essential for osteoclast recruitment into developing long bones. *J Cell Biol* 151:879–889
  270. Carano RA, Filvaroff EH 2003 Angiogenesis and bone repair. *Drug Discov Today* 8:980–989
  271. Haigh JJ, Gerber HP, Ferrara N, Wagner EF 2000 Conditional inactivation of VEGF-A in areas of collagen2a1 expression results in embryonic lethality in the heterozygous state. *Development* 127:1445–1453
  272. Zelzer E, McLean W, Ng YS, Fukai N, Reginato AM, Lovejoy S, D'Amore PA, Olsen BR 2002 Skeletal defects in VEGF(120/120) mice reveal multiple roles for VEGF in skeletogenesis. *Development* 129:1893–1904
  273. Bassett DL 1943 The changes in the vascular pattern of the ovary of the albino rat during the estrous cycle. *Am J Anat* 73:251–278
  274. Zeleznik AJ, Schuler HM, Reichert Jr LE 1981 Gonadotropin-binding sites in the rhesus monkey ovary: role of the vasculature in the selective distribution of human chorionic gonadotropin to the preovulatory follicle. *Endocrinology* 109:356–362
  275. Carr BR, MacDonald PC, Simpson ER 1981 The role of lipoproteins in the regulation of progesterone secretion by the corpus luteum. *Fertil Steril* 38:303–311
  276. Goede V, Schmidt T, Kimmina S, Kozian D, Augustin HG 1998 Analysis of blood vessel maturation processes during cyclic ovarian angiogenesis. *Lab Invest* 78:1385–1394
  277. Maisonnier PC, Suri C, Jones PF, Bartunkova S, Wiegand SJ, Radziejewski C, Compton D, McClain J, Aldrich TH, Papadopoulos N, Daly TJ, Davis S, Sato TN, Yancopoulos GD 1997 Angiopoietin-2, a natural antagonist for Tie-2 that disrupts in vivo angiogenesis. *Science* 277:55–60
  278. Phillips HS, Hains J, Leung DW, Ferrara N 1990 Vascular endothelial growth factor is expressed in rat corpus luteum. *Endocrinology* 127:965–967
  279. Ravindranath N, Little-Ihrig L, Phillips HS, Ferrara N, Zeleznik AJ 1992 Vascular endothelial growth factor messenger ribonucleic acid expression in the primate ovary. *Endocrinology* 131:254–260
  280. Zimmermann RC, Xiao E, Husami N, Sauer MV, Lobo R, Kitajewski J, Ferin M 2001 Short-term administration of antivascular endothelial growth factor antibody in the late follicular phase delays follicular development in the rhesus monkey. *J Clin Endocrinol Metab* 86:768–772
  281. Zimmermann RC, Hartman T, Bohlen P, Sauer MV, Kitajewski J 2001 Preovulatory treatment of mice with anti-VEGF receptor 2 antibody inhibits angiogenesis in corpora lutea. *Microvasc Res* 62:15–25
  282. Fraser HM, Dickson SE, Lunn SF, Wulff C, Morris KD, Carroll VA, Bicknell R 2000 Suppression of luteal angiogenesis in the primate after neutralization of vascular endothelial growth factor. *Endocrinology* 141:995–1000
  283. Hazzard TM, Xu F, Stouffer RL 2002 Injection of soluble vascular endothelial growth factor receptor 1 into the preovulatory follicle disrupts ovulation and subsequent luteal function in rhesus monkeys. *Biol Reprod* 67:1305–1312
  284. Rowe AJ, Morris KD, Bicknell R, Fraser HM 2002 Angiogenesis in the corpus luteum of early pregnancy in the marmoset and the effects of vascular endothelial growth factor immunoneutralization on establishment of pregnancy. *Biol Reprod* 67:1180–1188
  285. LeCouter J, Kowalski J, Foster J, Hass P, Zhang Z, Dillard-Telm L, Frantz G, Rangell L, DeGuzman L, Keller G-A, Peale F, Gurney A, Hillan KJ, Ferrara N 2001 Identification of an angiogenic mitogen selective for endocrine gland endothelium. *Nature* 412:877–884
  286. LeCouter J, Lin R, Ferrara N 2002 Endocrine gland-derived VEGF and the emerging hypothesis of organ-specific regulation of angiogenesis. *Nat Med* 8:913–917
  287. Kaser A, Winklmayr M, Lepperding G, Kreil G 2003 The AVIT protein family. *EMBO Rep* 4:469–473
  288. Ferrara N, Frantz G, LeCouter J, Dillard-Telm L, Pham T, Draksharapu A, Giordano T, Peale F 2003 Differential expression of the angiogenic factor genes VEGF and EG-VEGF in normal and polycystic human ovaries. *Am J Pathol* 162:1881–1893
  289. LeCouter J, Lin R, Frantz G, Zhang Z, Hillan K, Ferrara N 2003 Mouse endocrine-gland derived vascular endothelial growth factor. A distinct expression pattern from its human ortholog suggests different roles as a regulator of organ-specific angiogenesis. *Endocrinology* 144:2606–2616
  290. Luo X, Ikeda Y, Parker KL 1994 A cell-specific nuclear receptor is essential for adrenal and gonadal development and sexual differentiation. *Cell* 77:481–490
  291. Sadovsky Y, Crawford PA, Woodson KG, Polish JA, Clements MA, Tourtellotte LM, Simburger K, Milbrandt J 1995 Mice deficient in the orphan receptor steroidogenic factor 1 lack adrenal glands and gonads but express P450 side-chain-cleavage enzyme in the placenta and have normal embryonic serum levels of corticosteroids. *Proc Natl Acad Sci USA* 92:10939–10943
  292. Parker KL, Rice DA, Lala DS, Ikeda Y, Luo X, Wong M, Bakke M, Zhao L, Frigeri C, Hanley NA, Stallings N, Schimmer BP 2002 Steroidogenic factor 1: an essential mediator of endocrine development. *Recent Prog Horm Res* 57:19–36
  293. Lasley B, Benirschke K 1994 Strategies of ovarian function of importance to gynecologic investigations. *J Soc Gynecol Investig* 1:247–255
  294. Fraser HM, Lunn SF 2000 Angiogenesis and its control in the female reproductive system. *Br Med Bull* 56:787–797
  295. Lammert E, Gu G, McLaughlin M, Brown D, Brekken R, Murtaugh LC, Gerber HP, Ferrara N, Melton DA 2003 Role of VEGF-A in vascularization of pancreatic islets. *Curr Biol* 13:1070–1074
  296. Volm M, Koomagi R, Mattern J, Stammers G 1997 Angiogenic growth factors and their receptors in non-small cell lung carcinomas and their relationships to drug response in vitro. *Anticancer Res* 17:99–103
  297. Volm M, Koomagi R, Mattern J 1997 Prognostic value of vascular endothelial growth factor and its receptor Flt-1 in squamous cell lung cancer. *Int J Cancer* 74:64–68
  298. Brown LF, Berse B, Jackman RW, Tognazzi K, Guidi AJ, Dvorak HF, Senger DR, Connolly JL, Schnitt SJ 1995 Expression of vascular permeability factor (vascular endothelial growth factor) and its receptors in breast cancer. *Hum Pathol* 26:86–91
  299. Yoshiji H, Gomez DE, Shibuya M, Thorgeirsson UP 1996 Expression of vascular endothelial growth factor, its receptor, and other angiogenic factors in human breast cancer. *Cancer Res* 56:2013–2016
  300. Brown LF, Berse B, Jackman RW, Tognazzi K, Manseau EJ, Senger DR, Dvorak HF 1993 Expression of vascular permeability factor (vascular endothelial growth factor) and its receptors in adenocarcinomas of the gastrointestinal tract. *Cancer Res* 53:4727–4735

301. Suzuki K, Hayashi N, Miyamoto Y, Yamamoto M, Ohkawa K, Ito Y, Sasaki Y, Yamaguchi Y, Nakase H, Noda K, Enomoto N, Arai K, Yamada Y, Yoshihara H, Tujimura T, Kawano K, Yoshikawa K, Kamada T 1996 Expression of vascular permeability factor/vascular endothelial growth factor in human hepatocellular carcinoma. *Cancer Res* 56:3004–3009
302. Ellis LM, Takahashi Y, Fenoglio CJ, Cleary KR, Bucana CD, Evans DB 1998 Vessel counts and vascular endothelial growth factor expression in pancreatic adenocarcinoma. *Eur J Cancer* 34:337–340
303. Uchida S, Shimada Y, Watanabe G, Tanaka H, Shibagaki I, Miyahara T, Ishigami S, Imamura M 1998 In oesophageal squamous cell carcinoma vascular endothelial growth factor is associated with p53 mutation, advanced stage and poor prognosis. *Br J Cancer* 77:1704–1709
304. Brown LF, Berse B, Jackman RW, Tognazzi K, Manseau EJ, Dvorak HF, Senger DR 1993 Increased expression of vascular permeability factor (vascular endothelial growth factor) and its receptors in kidney and bladder carcinomas. *Am J Pathol* 143:1255–1262
305. Nicol D, Hii SI, Walsh M, Teh B, Thompson L, Kennett C, Gotley D 1997 Vascular endothelial growth factor expression is increased in renal cell carcinoma. *J Urol* 157:1482–1486
306. Tomisawa M, Tokunaga T, Oshika Y, Tsuchida T, Fukushima Y, Sato H, Kijima H, Yamazaki H, Ueyama Y, Tamaoki N, Nakamura M 1999 Expression pattern of vascular endothelial growth factor isoform is closely correlated with tumour stage and vascularisation in renal cell carcinoma. *Eur J Cancer* 35:133–137
307. Olson TA, Mohanraj D, Carson LF, Ramakrishnan S 1994 Vascular permeability factor gene expression in normal and neoplastic human ovaries. *Cancer Res* 54:276–280
308. Sowter HM, Corps AN, Evans AL, Clark DE, Charnock-Jones DS, Smith SK 1997 Expression and localization of the vascular endothelial growth factor family in ovarian epithelial tumors. *Lab Invest* 77:607–614
309. Yamamoto S, Konishi I, Mandai M, Kuroda H, Komatsu T, Nanbu K, Sakahara H, Mori T 1997 Expression of vascular endothelial growth factor (VEGF) in epithelial ovarian neoplasms: correlation with clinicopathology and patient survival, and analysis of serum VEGF levels. *Br J Cancer* 76:1221–1227
310. Guidi AJ, Abu Jawdeh G, Tognazzi K, Dvorak HF, Brown LF 1996 Expression of vascular permeability factor (vascular endothelial growth factor) and its receptors in endometrial carcinoma. *Cancer* 78:454–460
311. Shweiki D, Itin A, Soffer D, Keshet E 1992 Vascular endothelial growth factor induced by hypoxia may mediate hypoxia-initiated angiogenesis. *Nature* 359:843–845
312. Plate KH, Breier G, Weich HA, Risau W 1992 Vascular endothelial growth factor is a potential tumour angiogenesis factor in human gliomas in vivo. *Nature* 359:845–848
313. Phillips HS, Armanini M, Stavrou D, Ferrara N, Westphal M 1993 Intense focal expression of vascular endothelial growth factor mRNA in human intracranial neoplasms: association with regions of necrosis. *Int J Oncol* 2:913–919
314. Berkman RA, Merrill MJ, Reinhold WC, Monacci WT, Saxena A, Clark WC, Robertson JT, Ali IU, Oldfield EH 1993 Expression of the vascular permeability factor/vascular endothelial growth factor gene in central nervous system neoplasms. *J Clin Invest* 91:153–159
315. Witzigmann Voos S, Breier G, Risau W, Plate KH 1995 Up-regulation of vascular endothelial growth factor and its receptors in von Hippel-Lindau disease-associated and sporadic hemangioblastomas. *Cancer Res* 55:1358–1364
316. Lloyd RV, Scheithauer BW, Kuroki T, Vidal S, Kovacs K, Stefanescu L 1999 Vascular endothelial growth factor (VEGF) expression in human pituitary adenomas and carcinomas. *Endocr Pathol* 10:229–235
317. Soh EY, Duh QY, Sobhi SA, Young DM, Epstein HD, Wong MG, Garcia YK, Min YD, Grossman RF, Siperstein AE, Clark OH 1997 Vascular endothelial growth factor expression is higher in differentiated thyroid cancer than in normal or benign thyroid. *J Clin Endocrinol Metab* 82:3741–3747
318. Klein M, Vignaud JM, Hennequin V, Toussaint B, Bresler L, Plenat F, Leclerc J, Duprez A, Weryha G 2001 Increased expression of the vascular endothelial growth factor is a pejorative prognosis marker in papillary thyroid carcinoma. *J Clin Endocrinol Metab* 86:656–658
319. Turner HE, Harris AL, Melmed S, Wass JA 2003 Angiogenesis in endocrine tumors. *Endocr Rev* 24:600–632
320. Kim KJ, Li B, Winer J, Armanini M, Gillett N, Phillips HS, Ferrara N 1993 Inhibition of vascular endothelial growth factor-induced angiogenesis suppresses tumor growth in vivo. *Nature* 362:841–844
321. Warren RS, Yuan H, Matli MR, Gillett NA, Ferrara N 1995 Regulation by vascular endothelial growth factor of human colon cancer tumorigenesis in a mouse model of experimental liver metastasis. *J Clin Invest* 95:1789–1797
322. Melnyk O, Shuman MA, Kim KJ 1996 Vascular endothelial growth factor promotes tumor dissemination by a mechanism distinct from its effect on primary tumor growth. *Cancer Res* 56:921–924
323. Asano M, Yukita A, Matsumoto T, Kondo S, Suzuki H 1995 Inhibition of tumor growth and metastasis by an immunoneutralizing monoclonal antibody to human vascular endothelial growth factor/vascular permeability factor 121. *Cancer Res* 55:5296–5301
324. Borgstrom P, Hillan KJ, Sriramarao P, Ferrara N 1996 Complete inhibition of angiogenesis and growth of microtumors by anti-vascular endothelial growth factor neutralizing antibody: novel concepts of angiostatic therapy from intravital videomicroscopy. *Cancer Res* 56:4032–4039
325. Borgstrom P, Bourdon MA, Hillan KJ, Sriramarao P, Ferrara N 1998 Neutralizing anti-vascular endothelial growth factor antibody completely inhibits angiogenesis and growth of human prostate carcinoma micro tumors in vivo. *Prostate* 35:1–10
326. Mesiano S, Ferrara N, Jaffe RB 1998 Role of vascular endothelial growth factor in ovarian cancer: inhibition of ascites formation by immunoneutralization. *Am J Pathol* 153:1249–1256
327. Borgstrom P, Gold DP, Hillan KJ, Ferrara N 1999 Importance of VEGF for breast cancer angiogenesis in vivo: implications from intravital microscopy of combination treatments with an anti-VEGF neutralizing monoclonal antibody and doxorubicin. *Anticancer Res* 19:4203–4214
328. Millauer B, Shawver LK, Plate KH, Risau W, Ullrich A 1994 Glioblastoma growth inhibited in vivo by a dominant-negative Flk-1 mutant. *Nature* 367:576–579
329. Strawn LM, McMahon G, App H, Schreck R, Kuchler WR, Longhi MP, Hui TH, Tang C, Levitzki A, Gazit A, Chen I, Keri G, Orfi L, Risau W, Flamme I, Ullrich A, Hirth KP, Shawver LK 1996 Flk-1 as a target for tumor growth inhibition. *Cancer Res* 56:3540–3545
330. Wood JM, Bold G, Buchdunger E, Cozens R, Ferrari S, Frei J, Hofmann F, Mestian J, Mett H, O'Reilly T, Persohn E, Rosel J, Schnell C, Stover D, Theuer A, Towbin H, Wenger F, Woods-Cook K, Menrad A, Siemeister G, Schirmer M, Thierach KH, Schneider MR, Dreys J, Martiny-Baron G, Totzke F 2000 PTK787/ZK 222584, a novel and potent inhibitor of vascular endothelial growth factor receptor tyrosine kinases, impairs vascular endothelial growth factor-induced responses and tumor growth after oral administration. *Cancer Res* 60:2178–2189
331. Wedge SR, Ogilvie DJ, Dukes M, Kendrew J, Curwen JO, Hennequin LF, Thomas AP, Stokes ES, Curry B, Richmond GH, Wadsworth PF 2000 ZD4190: an orally active inhibitor of vascular endothelial growth factor signaling with broad-spectrum antitumor efficacy. *Cancer Res* 60:970–975
332. Saleh M, Stacker SA, Wilks AF 1996 Inhibition of growth of C6 glioma cells in vivo by expression of antisense vascular endothelial growth factor sequence. *Cancer Res* 56:393–401
333. Oku T, Tjuvajev JG, Miyagawa T, Sasajima T, Joshi A, Joshi R, Finn R, Claffey KP, Blasberg RG 1998 Tumor growth modulation by sense and antisense vascular endothelial growth factor gene expression: effects on angiogenesis, vascular permeability, blood volume, blood flow, fluorodeoxyglucose uptake, and proliferation of human melanoma intracerebral xenografts. *Cancer Res* 58:4185–4192
334. Prewett M, Huber J, Li Y, Santiago A, O'Connor W, King K, Overholser J, Hooper A, Pytowski B, Witte L, Bohlen P, Hicklin DJ 1999 Antivascular endothelial growth factor receptor (fetal liver



- kinase 1) monoclonal antibody inhibits tumor angiogenesis. *Cancer Res* 59:5209–5218
335. Kong HL, Hecht D, Song W, Kovesdi I, Hackett NR, Yayon A, Crystal RG 1998 Regional suppression of tumor growth by in vivo transfer of a cDNA encoding a secreted form of the extracellular domain of the flt-1 vascular endothelial growth factor receptor. *Hum Gene Ther* 9:823–833
  336. Goldman CK, Kendall RL, Cabrera G, Soroceanu L, Heike Y, Gillespie GY, Siegal GP, Mao X, Bett AJ, Huckle WR, Thomas KA, Curiel DT 1998 Paracrine expression of a native soluble vascular endothelial growth factor receptor inhibits tumor growth, metastasis, and mortality rate. *Proc Natl Acad Sci USA* 95:8795–8800
  337. Gerber HP, Kowalski J, Sherman D, Eberhard DA, Ferrara N 2000 Complete inhibition of rhabdomyosarcoma xenograft growth and neovascularization requires blockade of both tumor and host vascular endothelial growth factor. *Cancer Res* 60:6253–6258
  338. Kuo CJ, Farnebo F, Yu EY, Christofferson R, Swearingen RA, Carter R, von Recum HA, Yuan J, Kumihara J, Flynn E, D'Amato R, Folkman J, Mulligan RC 2001 Comparative evaluation of the antitumor activity of antiangiogenic proteins delivered by gene transfer. *Proc Natl Acad Sci USA* 98:4605–4610
  339. Holash J, Davis S, Papadopoulos N, Croll SD, Ho L, Russell M, Boland P, Leidich R, Hylton D, Burova E, Ioffe E, Huang T, Radziejewski C, Bailey K, Fandl JP, Daly T, Wiegand SJ, Yancopoulos GD, Rudge JS 2002 VEGF-Trap: a VEGF blocker with potent antitumor effects. *Proc Natl Acad Sci USA* 99:11393–11398
  340. Soh EY, Eigelsberger MS, Kim KJ, Wong MG, Young DM, Clark OH, Duh QY 2000 Neutralizing vascular endothelial growth factor activity inhibits thyroid cancer growth in vivo. *Surgery* 128:1059–1065
  341. Schoenberger J, Grimm D, Kossmehl P, Infanger M, Kurth E, Eilles C 2003 Effects of PTK787/ZK222584 a tyrosine kinase inhibitor on the growth of a poorly differentiated thyroid carcinoma. An animal study. *Endocrinology* 145:1031–1038
  342. Fukumura D, Xavier R, Sugura T, Chen Y, Park EC, Lu N, Selig M, Nielsen G, Taksir T, Jain RK, Seed B 1998 Tumor induction of VEGF promoter activity in stromal cells. *Cell* 94:715–725
  343. Tsuzuki Y, Fukumura D, Oosthuysen B, Koike C, Carmeliet P, Jain RK 2000 Vascular endothelial growth factor (VEGF) modulation by targeting hypoxia-inducible factor-1 $\alpha$ →hypoxia response element→ VEGF cascade differentially regulates vascular response and growth rate in tumors. *Cancer Res* 60:6248–6252
  344. Kishimoto J, Ehama R, Ge Y, Kobayashi T, Nishiyama T, Detmar M, Burgeson RE 2000 In vivo detection of human vascular endothelial growth factor promoter activity in transgenic mouse skin. *Am J Pathol* 157:103–110
  345. Inoue M, Hager JH, Ferrara N, Gerber HP, Hanahan D 2002 VEGF-A has a critical, nonredundant role in angiogenic switching and pancreatic  $\beta$  cell carcinogenesis. *Cancer Cell* 1:193–202
  346. Bergers G, Benjamin LE 2003 Tumorigenesis and the angiogenic switch. *Nat Rev Cancer* 3:401–410
  347. Klement G, Baruchel S, Rak J, Man S, Clark K, Hicklin DJ, Bohlen P, Kerbel RS 2000 Continuous low-dose therapy with vinblastine and VEGF receptor-2 antibody induces sustained tumor regression without overt toxicity. *J Clin Invest* 105:R15–R24
  348. Lee CG, Heijn M, di Tomaso E, Griffon-Etienne G, Ancukiewicz M, Koike C, Park KR, Ferrara N, Jain RK, Suit HD, Boucher Y 2000 Anti-vascular endothelial growth factor treatment augments tumor radiation response under normoxic or hypoxic conditions. *Cancer Res* 60:5565–5570
  349. Kozin SV, Boucher Y, Hicklin DJ, Bohlen P, Jain RK, Suit HD 2001 Vascular endothelial growth factor receptor-2-blocking antibody potentiates radiation-induced long-term control of human tumor xenografts. *Cancer Res* 61:39–44
  350. Jain RK 2001 Normalizing tumor vasculature with anti-angiogenic therapy: a new paradigm for combination therapy. *Nat Med* 7:987–989
  351. Pham CD, Roberts TP, van Bruggen N, Melnyk O, Mann J, Ferrara N, Cohen RL, Brasch RC 1998 Magnetic resonance imaging detects suppression of tumor vascular permeability after administration of antibody to vascular endothelial growth factor. *Cancer Invest* 16:225–230
  352. Willett CG, Boucher Y, Di Tomaso E, Duda DG, Munn LL, Tong RT, Chung DC, Sahani DV, Kalva SP, Kozin SV, Mino M, Cohen KS, Scadden DT, Hartford AC, Fischman AJ, Clark JW, Ryan DP, Zhu AX, Blazzkowsky LS, Chen HX, Shellito PC, Lauwers GY, Jain RK 2004 Direct evidence that the VEGF-specific antibody bevacizumab has antivasculature effects in human rectal cancer. *Nat Med* 10:145–147
  353. Presta LG, Chen H, O'Connor SJ, Chisholm V, Meng YG, Krummen L, Winkler M, Ferrara N 1997 Humanization of an anti-VEGF monoclonal antibody for the therapy of solid tumors and other disorders. *Cancer Res* 57:4593–4599
  354. Gerber HP, Ferrara N 2003 The role of VEGF in normal and neoplastic hematopoiesis. *J Mol Med* 81:20–31
  355. Smolich BD, Yuen HA, West KA, Giles FJ, Albitar M, Cherrington JM 2001 The antiangiogenic protein kinase inhibitors SU5416 and SU6668 inhibit the SCF receptor (c-kit) in a human myeloid leukemia cell line and in acute myeloid leukemia blasts. *Blood* 97:1413–1421
  356. Dias S, Hattori K, Zhu Z, Heissig B, Choy M, Lane W, Wu Y, Chaddburn A, Hyjek E, Gill M, Hicklin DJ, Witte L, Moore MA, Rafii S 2000 Autocrine stimulation of VEGFR-2 activates human leukemic cell growth and migration. *J Clin Invest* 106:511–521
  357. Fiedler W, Mesters R, Tinnfeld H, Loges S, Staib P, Duhrsen U, Flassehove M, Ottmann OG, Jung W, Cavalli F, Kuse R, Thomalla J, Serve H, O'Farrell AM, Jacobs M, Brega NM, Scigalla P, Hossfeld DK, Berdel WE 2003 A phase II clinical study of SU5416 in patients with refractory acute myeloid leukemia. *Blood* 102:2763–2767
  358. Patz A 1980 Studies on retinal neovascularization. *Invest Ophthalmol Vis Sci* 19:1133–1138
  359. Stone J, Itin A, Alon T, Pe'er J, Gnessin H, Chan Ling T, Keshet E 1995 Development of retinal vasculature is mediated by hypoxia-induced vascular endothelial growth factor (VEGF) expression by neuroglia. *J Neurosci* 15:4738–4747
  360. Benjamin LE, Hemo I, Keshet E 1998 A plasticity window for blood vessel remodelling is defined by pericyte coverage of the preformed endothelial network and is regulated by PDGF-B and VEGF. *Development* 125:1591–1598
  361. Lindhal P, Johansson BE, Leveen P, Betsholtz C 1997 Pericyte loss and microaneurysm formation in PDGF-B-deficient mice. *Science* 277:242–245
  362. Miller JW, Adamis AP, Shima DT, D'Amore PA, Moulton RS, O'Reilly MS, Folkman J, Dvorak HF, Brown LF, Berse B, Yeo TK, Yeo KT 1994 Vascular endothelial growth factor/vascular permeability factor is temporally and spatially correlated with ocular angiogenesis in a primate model. *Am J Pathol* 145:574–584
  363. Pierce EA, Foley ED, Smith LE 1996 Regulation of vascular endothelial growth factor by oxygen in a model of retinopathy of prematurity. *Arch Ophthalmol* 114:1219–1228
  364. Aiello LP, Avery RL, Arrigg PG, Keyt BA, Jampel HD, Shah ST, Pasquale LR, Thieme H, Iwamoto MA, Park JE, Nguyen H, Aiello LM, Ferrara N, King GL 1994 Vascular endothelial growth factor in ocular fluid of patients with diabetic retinopathy and other retinal disorders. *N Engl J Med* 331:1480–1487
  365. Malecaze F, Clemens S, Simorer-Pinot V, Mathis A, Chollet P, Favard P, Bayard F, Plouet J 1994 Detection of vascular endothelial growth factor mRNA and vascular endothelial growth factor-like activity in proliferative diabetic retinopathy. *Arch Ophthalmol* 112:1476–1482
  366. Aiello LP, Pierce EA, Foley ED, Takagi H, Chen H, Riddle L, Ferrara N, King GL, Smith LE 1995 Suppression of retinal neovascularization in vivo by inhibition of vascular endothelial growth factor (VEGF) using soluble VEGF-receptor chimeric proteins. *Proc Natl Acad Sci USA* 92:10457–10461
  367. Adamis AP, Shima DT, Tolentino MJ, Gragoudas ES, Ferrara N, Folkman J, D'Amore PA, Miller JW 1996 Inhibition of vascular endothelial growth factor prevents retinal ischemia-associated iris neovascularization in a nonhuman primate. *Arch Ophthalmol* 114:66–71
  368. Robinson GS, Pierce EA, Rook SL, Foley E, Webb R, Smith LE 1996 Oligodeoxynucleotides inhibit retinal neovascularization in a murine model of proliferative retinopathy. *Proc Natl Acad Sci USA* 93:4851–4856



369. Ozaki H, Seo MS, Ozaki K, Yamada H, Yamada E, Okamoto N, Hofmann F, Wood JM, Campochiaro PA 2000 Blockade of vascular endothelial cell growth factor receptor signaling is sufficient to completely prevent retinal neovascularization. *Am J Pathol* 156: 697–707
370. Suzuma K, Takahara N, Suzuma I, Isshiki K, Ueki K, Leitges M, Aiello LP, King GL 2002 Characterization of protein kinase C  $\beta$  isoform's action on retinoblastoma protein phosphorylation, vascular endothelial growth factor-induced endothelial cell proliferation, and retinal neovascularization. *Proc Natl Acad Sci USA* 99:721–726
371. Lopez PF, Sippy BD, Lambert HM, Thach AB, Hinton DR 1996 Transdifferentiated retinal pigment epithelial cells are immunoreactive for vascular endothelial growth factor in surgically excised age-related macular degeneration-related choroidal neovascular membranes. *Invest Ophthalmol Vis Sci* 37:855–868
372. Campochiaro PA, Hackett SF 2003 Ocular neovascularization: a valuable model system. *Oncogene* 22:6537–6548
373. Chen Y, Wiesmann C, Fuh G, Li B, Christinger HW, McKay P, de Vos AM, Lowman HB 1999 Selection and analysis of an optimized anti-VEGF antibody: crystal structure of an affinity-matured Fab in complex with antigen. *J Mol Biol* 293:865–881
374. Ruckman J, Green LS, Beeson J, Waugh S, Gillette WL, Henninger DD, Claesson-Welsh L, Janjic N 1998 2'-Fluoropyrimidine RNA-based aptamers to the 165-amino acid form of vascular endothelial growth factor (VEGF<sub>165</sub>). Inhibition of receptor binding and VEGF-induced vascular permeability through interactions requiring the exon 7-encoded domain. *J Biol Chem* 273:20556–20567
375. Krzystolik MG, Afshari MA, Adamis AP, Gaudreault J, Gragoudas ES, Michaud NA, Li W, Connolly E, O'Neill CA, Miller JW 2002 Prevention of experimental choroidal neovascularization with intravitreal anti-vascular endothelial growth factor antibody fragment. *Arch Ophthalmol* 120:338–346
376. Zheng M, Deshpande S, Lee S, Ferrara N, Rouse BT 2001 Contribution of vascular endothelial growth factor in the neovascularization process during the pathogenesis of herpetic stromal keratitis. *J Virol* 75:9828–9835
377. Detmar M, Yeo KT, Nagy JA, Van de Water L, Brown LF, Berse B, Elicker BM, Ledbetter S, Dvorak HF 1995 Keratinocyte-derived vascular permeability factor (vascular endothelial growth factor) is a potent mitogen for dermal microvascular endothelial cells. *J Invest Dermatol* 105:44–50
378. Detmar M, Brown LF, Schon MP, Elicker BM, Velasco P, Richard L, Fukumura D, Monsky W, Claffey KP, Jain RK 1998 Increased microvascular density and enhanced leukocyte rolling and adhesion in the skin of VEGF transgenic mice. *J Invest Dermatol* 111:1–6
379. Cramer T, Yamanishi Y, Clausen BE, Forster I, Pawlinski R, Mackman N, Haase VH, Jaenisch R, Corr M, Nizet V, Firestein GS, Gerber HP, Ferrara N, Johnson RS 2003 HIF1 $\alpha$  is essential for myeloid cell-mediated inflammation. *Cell* 112:645–657
380. Koch AE, Harlow L, Haines GK, Amento EP, Unemori EN, Wong W-L, Pope RM, Ferrara N 1994 Vascular endothelial growth factor: a cytokine modulating endothelial function in rheumatoid arthritis. *J Immunol* 152:4149–4156
381. Fava RA, Olsen NJ, Spencer-Green G, Yeo KT, Yeo TK, Berse B, Jackman RW, Senger DR, Dvorak HF, Brown LF 1994 Vascular permeability factor/endothelial growth factor (VPF/VEGF): accumulation and expression in human synovial fluids and rheumatoid synovial tissue. *J Exp Med* 180:341–346
382. Miotla J, Maciewicz R, Kendrew J, Feldmann M, Paleolog E 2000 Treatment with soluble VEGF receptor reduces disease severity in murine collagen-induced arthritis. *Lab Invest* 80:1195–1205
383. Sone H, Kawakami Y, Sakauchi M, Nakamura Y, Takahashi A, Shimano H, Okuda Y, Segawa T, Suzuki H, Yamada N 2001 Neutralization of vascular endothelial growth factor prevents collagen-induced arthritis and ameliorates established disease in mice. *Biochem Biophys Res Commun* 281:562–568
384. Afuwape AO, Feldmann M, Paleolog EM 2003 Adenoviral delivery of soluble VEGF receptor 1 (sFlt-1) abrogates disease activity in murine collagen-induced arthritis. *Gene Ther* 10:1950–1960
385. Matsumoto Y, Tanaka K, Hirata G, Hanada M, Matsuda S, Shuto T, Iwamoto Y 2002 Possible involvement of the vascular endothelial growth factor-Flt-1-focal adhesion kinase pathway in chemotaxis and the cell proliferation of osteoclast precursor cells in arthritic joints. *J Immunol* 168:5824–5831
386. Autiero M, Lutun A, Tjwa M, Carmeliet P 2003 Placental growth factor and its receptor, vascular endothelial growth factor receptor-1: novel targets for stimulation of ischemic tissue revascularization and inhibition of angiogenic and inflammatory disorders. *J Thromb Haemost* 1:1356–1370
387. Oura H, Bertoncini J, Velasco P, Brown LF, Carmeliet P, Detmar M 2003 A critical role of placental growth factor in the induction of inflammation and edema formation. *Blood* 101:560–567
388. Reinders ME, Sho M, Izawa A, Wang P, Mukhopadhyay D, Koss KE, Geehan CS, Luster AD, Sayegh MH, Briscoe DM 2003 Proinflammatory functions of vascular endothelial growth factor in alloimmunity. *J Clin Invest* 112:1655–1665
389. Monacci WT, Merrill MJ, Oldfield EH 1993 Expression of vascular permeability factor/vascular endothelial growth factor in normal rat tissues. *Am J Physiol* 264:C995–C1002
390. Kovacs Z, Ikezaki K, Samoto K, Inamura T, Fukui M 1996 VEGF and flt. Expression time kinetics in rat brain infarct. *Stroke* 27: 1865–1872
391. Hayashi T, Abe K, Suzuki H, Itoyama Y 1997 Rapid induction of vascular endothelial growth factor gene expression after transient middle cerebral artery occlusion in rats. *Stroke* 28:2039–2044
392. Lennmyr F, Ata KA, Funa K, Olsson Y, Terent A 1998 Expression of vascular endothelial growth factor (VEGF) and its receptors (Flt-1 and Flk-1) following permanent and transient occlusion of the middle cerebral artery in the rat. *J Neuropathol Exp Neurol* 57: 874–882
393. van Bruggen N, Thibodeaux H, Palmer JT, Cairns B, Tumas D, Gerlai R, Williams S-P, van Lookeren Campagne M, Ferrara N 1999 VEGF antagonism reduces edema formation and tissue damage after ischemia/reperfusion injury in the mouse brain. *J Clin Invest* 104:1613–1620
394. Paul R, Zhang ZG, Eliceiri BP, Jiang Q, Boccia AD, Zhang RL, Chopp M, Cheresch DA 2001 Src deficiency or blockade of Src activity in mice provides cerebral protection following stroke. *Nat Med* 7:222–227
395. Sun Y, Jin K, Xie L, Childs J, Mao XO, Logvinova A, Greenberg DA 2003 VEGF-induced neuroprotection, neurogenesis, and angiogenesis after focal cerebral ischemia. *J Clin Invest* 111:1843–1851
396. Harrigan MR, Ennis SR, Sullivan SE, Keep RF 2003 Effects of intraventricular infusion of vascular endothelial growth factor on cerebral blood flow, edema, and infarct volume. *Acta Neurochir (Wien)* 145:49–53
397. Goldzieher JW, Green JA 1962 The polycystic ovary. I. Clinical and histologic features. *J Clin Endocrinol Metab* 22:325–332
398. Yen SSC 1996 A contemporary overview. In: Adashi EY, Rock JA, Rosenwaks Z, eds. Reproductive endocrinology, surgery, and technology. Philadelphia: Lippincott-Raven; 1117–1126
399. Dewailly D, Robert Y, Helin I, Ardaens Y, Thomas-Desrousseaux P, Lemaire L, Fossati P 1994 Ovarian stromal hypertrophy in hyperandrogenic women. *Clin Endocrinol (Oxf)* 41:557–562
400. Fulghesu AM, Ciampelli M, Belosi C, Apa R, Pavone N, Lanzone A 2001 A new ultrasound criterion for the diagnosis of polycystic ovary syndrome: the ovarian stroma/total area ratio. *Fertil Steril* 76:326–331
401. Dunaif A, Thomas A 2001 Current concepts in the polycystic ovary syndrome. *Annu Rev Med* 52:401–419
402. Tulandi T, Saleh A, Morris D, Jacobs HS, Payne NN, Tan SL 2000 Effects of laparoscopic ovarian drilling on serum vascular endothelial growth factor and on insulin responses to the oral glucose tolerance test in women with polycystic ovary syndrome. *Fertil Steril* 74:585–588
403. Agrawal R, Sladkevicius P, Engmann L, Conway GS, Payne NN, Bekis J, Tan SL, Campbell S, Jacobs HS 1998 Serum vascular endothelial growth factor concentrations and ovarian stromal blood flow are increased in women with polycystic ovaries. *Hum Reprod* 13:651–655
404. Kamat BR, Brown LF, Manseau EJ, Senger DR, Dvorak HF 1995 Expression of vascular permeability factor/vascular endothelial growth factor by human granulosa and theca lutein cells. Role in corpus luteum development. *Am J Pathol* 146:157–165
405. McClure N, Healy DL, Rogers PA, Sullivan J, Beaton L, Haning

- RV, Connolly DT, Robertson DM 1994 Vascular endothelial growth factor as a capillary permeability agent in ovarian hyperstimulation syndrome. *Lancet* 344:235–269
406. Levin ER, Rosen GF, Cassidenti DL, Yee B, Meldrum D, Wisot A, Pedram A 1998 Role of vascular endothelial cell growth factor in ovarian hyperstimulation syndrome. *J Clin Invest* 102:1978–1985
  407. Engel T, Jewelewicz R, Dyrenfurth I, Speroff L, Vande Wiele RL 1972 Ovarian hyperstimulation syndrome: report of one case with notes on pathogenesis and treatment. *Am J Obstet Gynecol* 112:1052–1057
  408. Haning RJ, Strawn E, Nolten W 1985 Pathophysiology of the ovarian hyperstimulation syndrome. *Obstet Gynecol* 166:220–224
  409. Kemmann E, Tavakoli F, Shelden RM, Jones JR 1981 Induction of ovulation with menotropins in women with polycystic ovary syndrome. *Am J Obstet Gynecol* 141:58–64
  410. Kobayashi H, Okada Y, Asahina T, Gotoh J, Terao T 1998 The kallikrein-kinin system, but not vascular endothelial growth factor, plays a role in the increased vascular permeability associated with ovarian hyperstimulation syndrome. *J Mol Endocrinol* 20:363–374
  411. McLaren J, Prentice A, Charnock-Jones DS, Millican SA, Muller KH, Sharkey AM, Smith SK 1996 Vascular endothelial growth factor is produced by peritoneal fluid macrophages in endometriosis and is regulated by ovarian steroids. *J Clin Invest* 98:482–489
  412. Shifren JL, Tseng JF, Zaloudek CJ, Ryan IP, Meng YG, Ferrara N, Jaffe RB, Taylor RN 1996 Ovarian steroid regulation of vascular endothelial growth factor in the human endometrium: implications for angiogenesis during the menstrual cycle and in the pathogenesis of endometriosis. *J Clin Endocrinol Metab* 81:3112–3118
  413. Hull ML, Charnock-Jones DS, Chan CL, Bruner-Tran KL, Osteen KG, Tom BD, Fan TP, Smith SK 2003 Antiangiogenic agents are effective inhibitors of endometriosis. *J Clin Endocrinol Metab* 88:2889–2899
  414. Maynard SE, Min JY, Merchan J, Lim KH, Li J, Mondal S, Libermann TA, Morgan JP, Sellke FW, Stillman IE, Epstein FH, Sukhatme VP, Karumanchi SA 2003 Excess placental soluble fms-like tyrosine kinase 1 (sFlt1) may contribute to endothelial dysfunction, hypertension, and proteinuria in preeclampsia. *J Clin Invest* 111:649–658
  415. Levine RJ, Maynard SE, Qian C, Lim KH, England LJ, Yu KF, Schisterman EF, Thadhani R, Sachs BP, Epstein FH, Sibai BM, Sukhatme VP, Karumanchi SA 2004 Circulating angiogenic factors and the risk of preeclampsia. *N Engl J Med* 350:672–683
  416. Graor RA, Gray BH 1991 Interventional treatment of peripheral vascular disease. St. Louis: Mosby
  417. Takeshita S, Zhong L, Brogi E, Kearney M, Pu L-Q, Bunting S, Ferrara N, Symes JF, Isner JM 1994 Therapeutic angiogenesis: a single intra-arterial bolus of vascular endothelial growth factor augments collateral vessel formation in a rabbit ischemic hind-limb model. *J Clin Invest* 93:662–670
  418. Takeshita S, Tsurumi Y, Couffinahl T, Asahara T, Bauters C, Symes J, Ferrara N, Isner JM 1996 Gene transfer of naked DNA encoding for three isoforms of vascular endothelial growth factor stimulates collateral development in vivo. *Lab Invest* 75:487–501
  419. Takeshita S, Weir L, Chen D, Zheng LP, Riessen R, Bauters C, Symes JF, Ferrara N, Isner JM 1996 Therapeutic angiogenesis following arterial gene transfer of vascular endothelial growth factor in a rabbit model of hindlimb ischemia. *Biochem Biophys Res Commun* 227:628–635
  420. Bauters C, Asahara T, Zheng LP, Takeshita S, Bunting S, Ferrara N, Symes JF, Isner JM 1995 Recovery of disturbed endothelium-dependent flow in the collateral-perfused rabbit ischemic hindlimb after administration of vascular endothelial growth factor. *Circulation* 91:2802–2809
  421. Mack CA, Magovern CJ, Budenbender KT, Patel SR, Schwarz EA, Zanzonico P, Ferris B, Sanborn T, Isom P, Ferris B, Sanborn T, Isom OW, Crystal RG, Rosengart TK 1998 Salvage angiogenesis induced by adenovirus-mediated gene transfer of vascular endothelial growth factor protects against ischemic vascular occlusion. *J Vasc Surg* 27:699–709
  422. Schratzberger P, Schratzberger G, Silver M, Curry C, Kearney M, Magner M, Alroy J, Adelman LS, Weinberg DH, Ropper AH, Isner JM 2000 Favorable effect of VEGF gene transfer on ischemic peripheral neuropathy. *Nat Med* 6:405–413
  423. Harada K, Friedman M, Lopez JJ, Wang SY, Li J, Prasad PV, Pearlman JD, Edelman ER, Sellke FW, Simons M 1996 Vascular endothelial growth factor administration in chronic myocardial ischemia. *Am J Physiol* 270:H1791–H1802
  424. Mack CA, Patel SR, Schwarz EA, Zanzonico P, Hahn RT, Iltercil A, Devereux RB, Goldsmith SJ, Christian TF, Sanborn TA, Kovesdi I, Hackett N, Isom OW, Crystal RG, Rosengart TK 1998 Biologic bypass with the use of adenovirus-mediated gene transfer of the complementary deoxyribonucleic acid for vascular endothelial growth factor 121 improves myocardial perfusion and function in the ischemic porcine heart. *J Thor Cardiovasc Surg* 115:168–176
  425. Isner JM, Pieczek A, Schainfeld R, Blair R, Haley L, Asahara T, Rosenfield K, Razvi S, Walsh K, Symes JF 1996 Clinical evidence of angiogenesis after arterial gene transfer of phVEGF165 in patient with ischaemic limb. *Lancet* 348:370–374
  426. Baumgartner I, Pieczek A, Manor O, Blair R, Kearney M, Walsh K, Isner JM 1998 Constitutive expression of phVEGF165 after intramuscular gene transfer promotes collateral vessel development in patients with critical limb ischemia. *Circulation* 97:1114–1123
  427. Losordo DW, Vale PR, Symes JF, Dunnington CH, Esakof DD, Maysky M, Ashare AB, Lathi K, Isner JM 1998 Gene therapy for myocardial angiogenesis: initial clinical results with direct myocardial injection of phVEGF165 as sole therapy for myocardial ischemia. *Circulation* 98:2800–2804
  428. Mäkinen K, Manninen H, Hedman M, Matsi P, Mussalo H, Alhava E, Ylä-Herttuala S 2002 Increased vascularity detected by digital subtraction angiography after VEGF gene transfer to human lower limb artery: a randomized, placebo-controlled, double-blinded phase II study. *Mol Ther* 6:127–133
  429. Dor Y, Djonov V, Abramovitch R, Itin A, Fishman GI, Carmeliet P, Goelman G, Keshet E 2002 Conditional switching of VEGF provides new insights into adult neovascularization and pro-angiogenic therapy. *EMBO J* 21:1939–1947
  430. Thurston G, Rudge JS, Ioffe E, Zhou H, Ross L, Croll SD, Glazer N, Holash J, McDonald DM, Yancopoulos GD 2000 Angiopoietin-1 protects the adult vasculature against plasma leakage. *Nat Med* 6:460–463
  431. Cao R, Brakenhielm E, Pawliuk R, Wariaro D, Post MJ, Wahlberg E, Le Boulch P, Cao Y 2003 Angiogenic synergism, vascular stability and improvement of hind-limb ischemia by a combination of PDGF-BB and FGF-2. *Nat Med* 9:604–613
  432. Tarkka T, Sipola A, Jamsa T, Soini Y, Ylä-Herttuala S, Tuukkanen J, Hautala T 2003 Adenoviral VEGF-A gene transfer induces angiogenesis and promotes bone formation in healing osseous tissues. *J Gene Med* 5:560–566
  433. Garber K 2002 Angiogenesis inhibitors suffer new setback. *Nat Biotechnol* 20:1067–1068
  434. Kerbel R, Folkman J 2002 Clinical translation of angiogenesis inhibitors. *Nat Rev Cancer* 2:727–739
  435. Bergers G, Song S, Meyer-Morse N, Bergsland E, Hanahan D 2003 Benefits of targeting both pericytes and endothelial cells in the tumor vasculature with kinase inhibitors. *J Clin Invest* 111:1287–1295
